# Supplementary material for: Effect of Mexican Propolis on Wound Healing in a Murine Model of Diabetes Mellitus
Source: MDPI journal article supplement (doi:10.3390/ijms25042201), 2024-02-12
Supplement: s1 [file s1]

**Figure S1.** GC–MS chromatograms of the hexanic and EA fractions and derivatization of ChEEP.

**Hexanic fraction of ChEEP.**

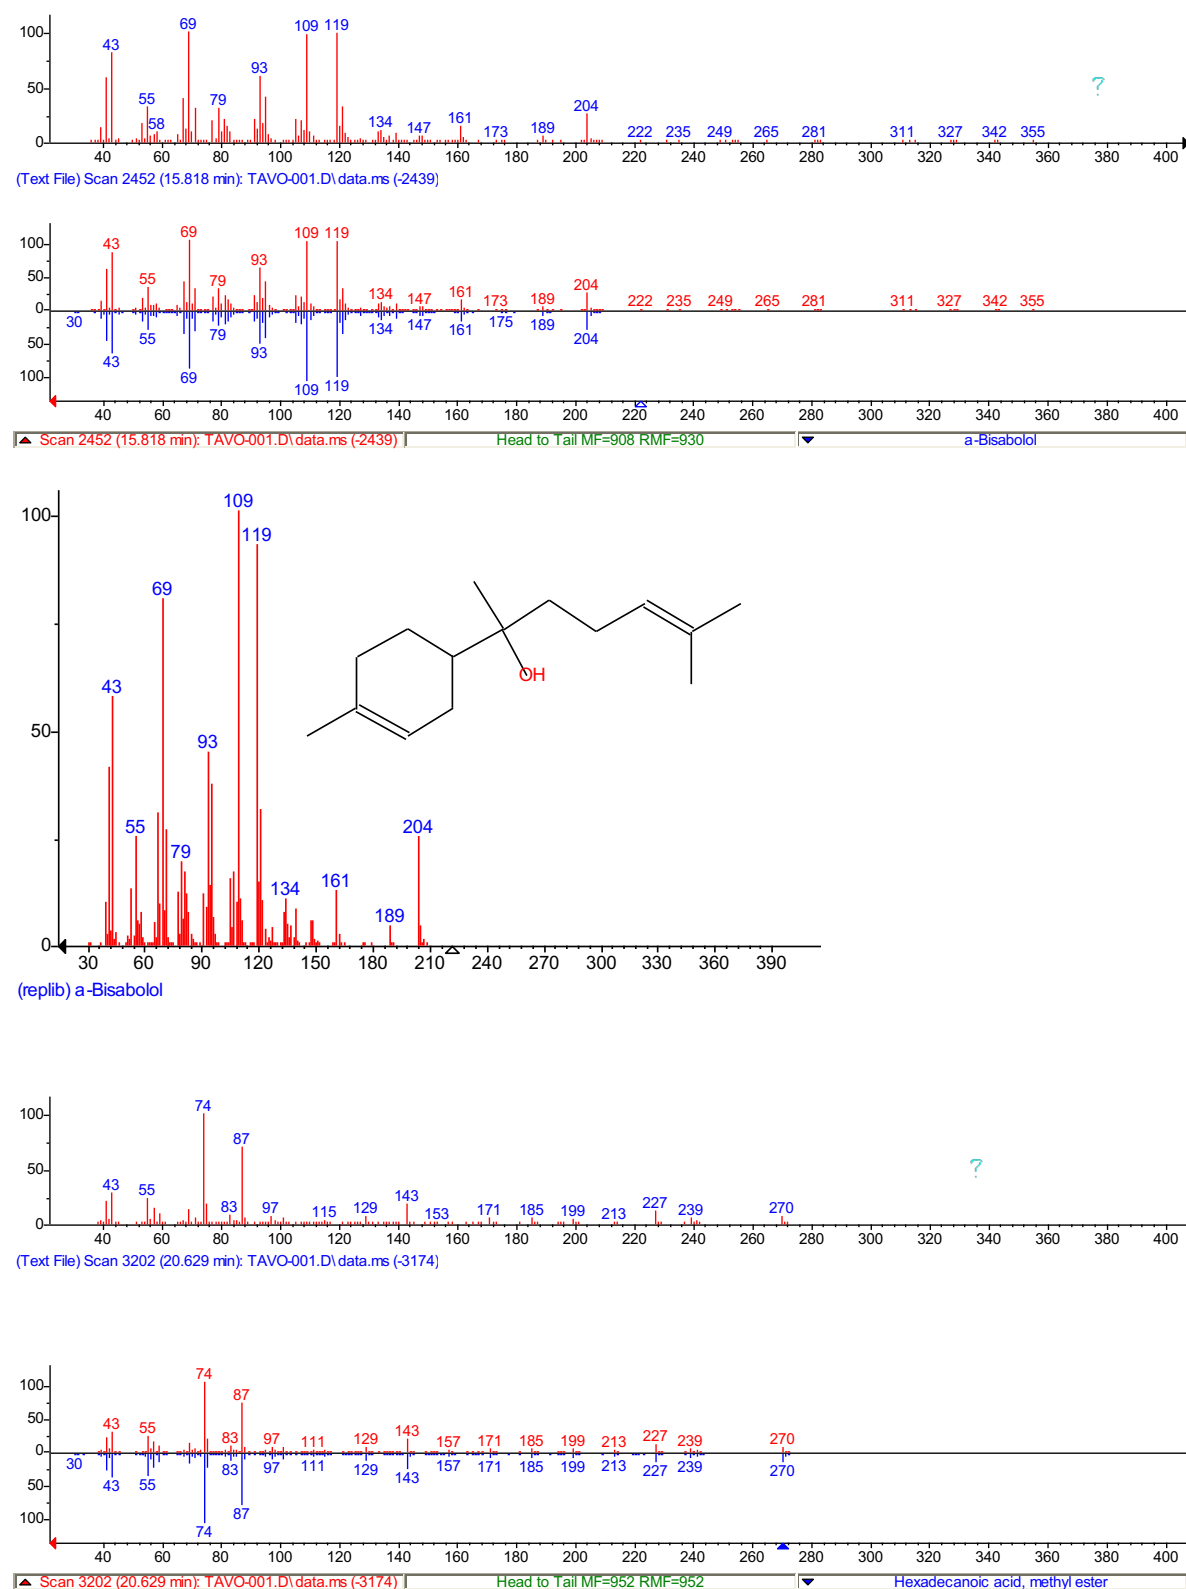

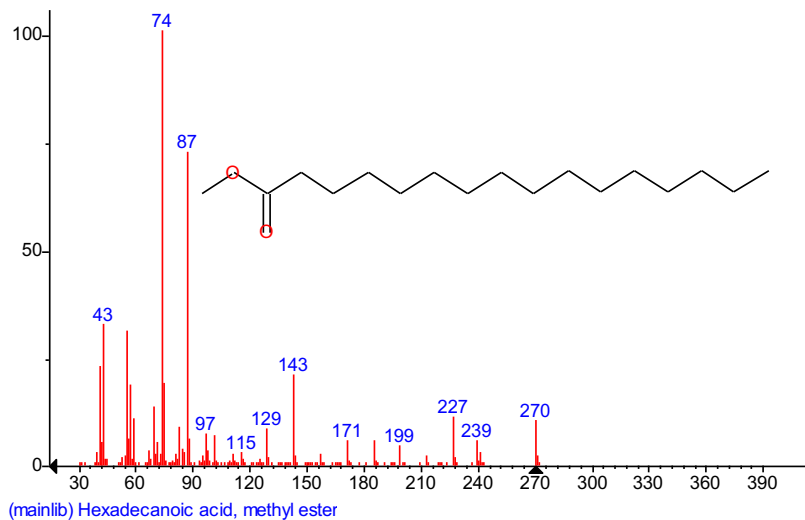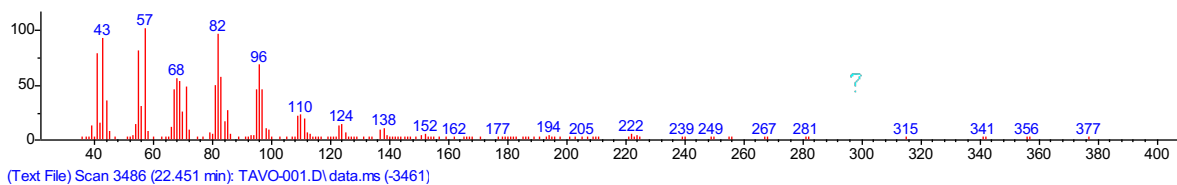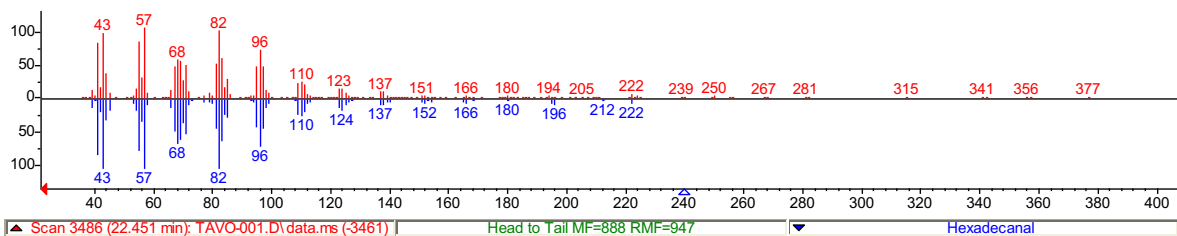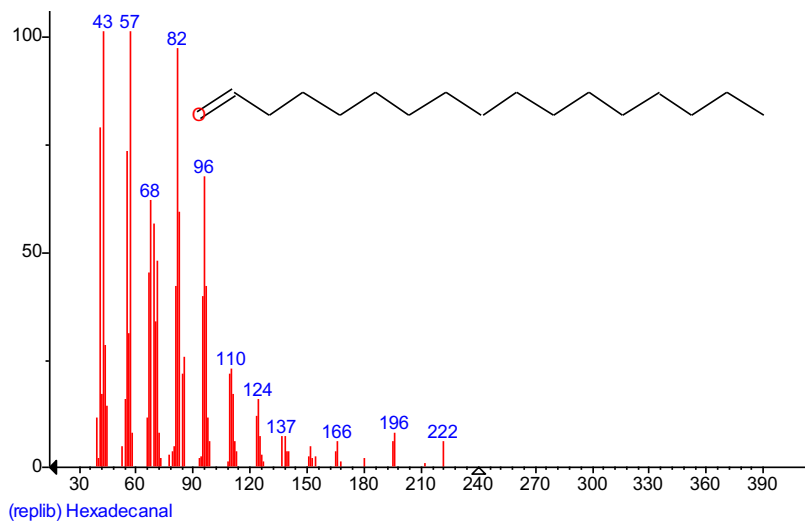

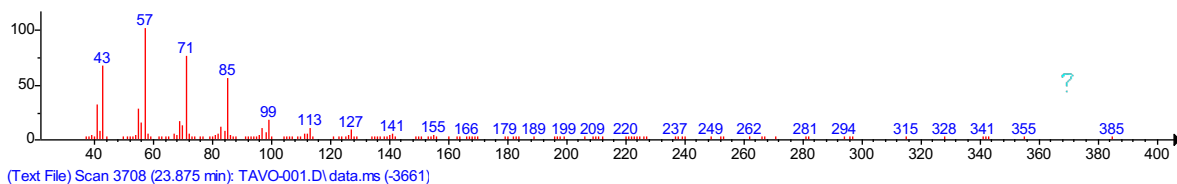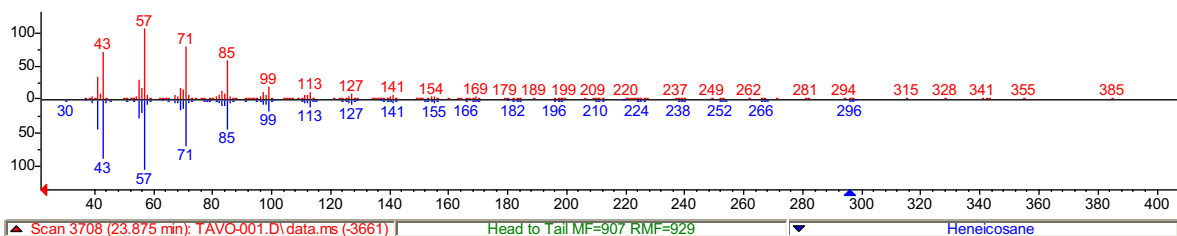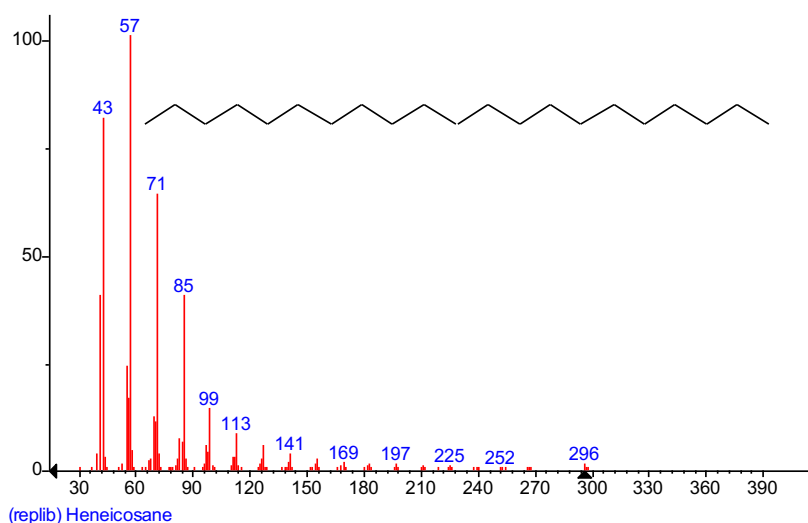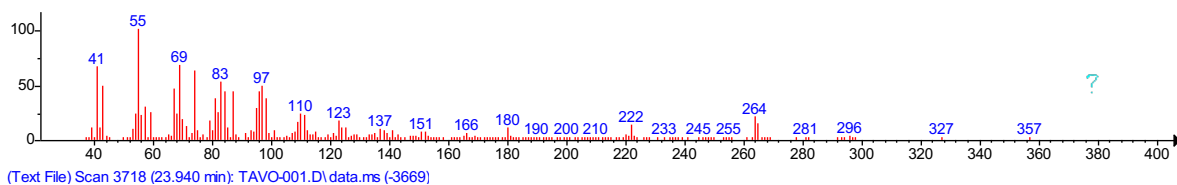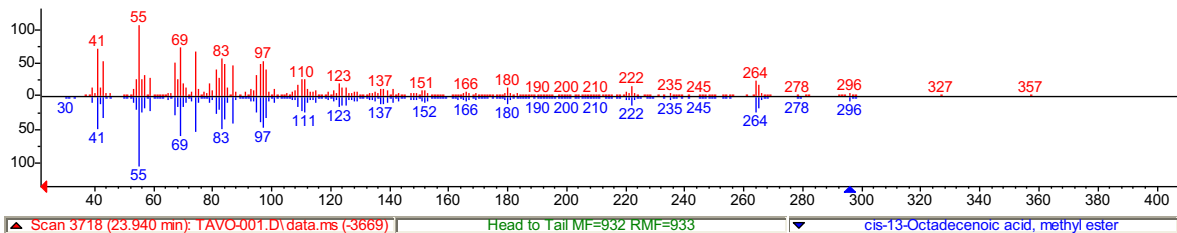

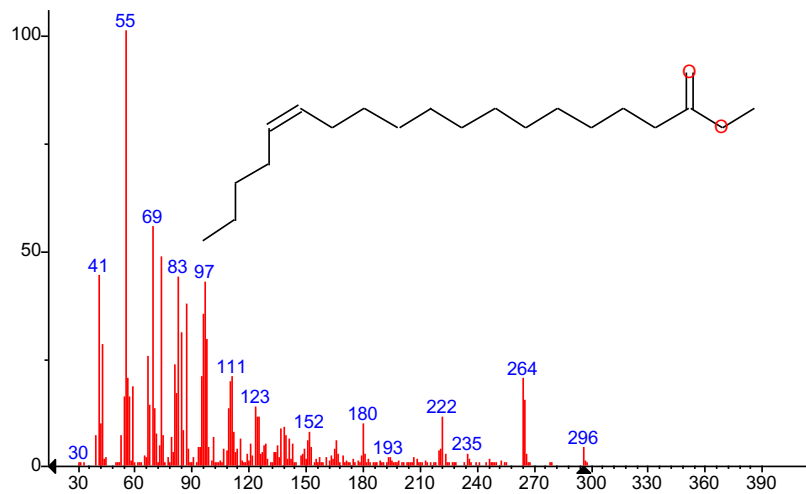

(mainlib) cis-13-Octadecenoic acid, methyl ester

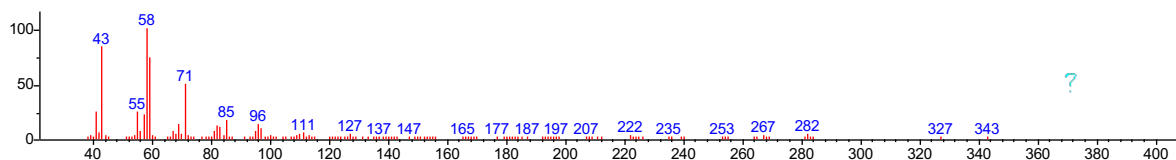

(Text File) Scan 3729 (24.010 min): TAVO-001.D\data.ms (-3669)

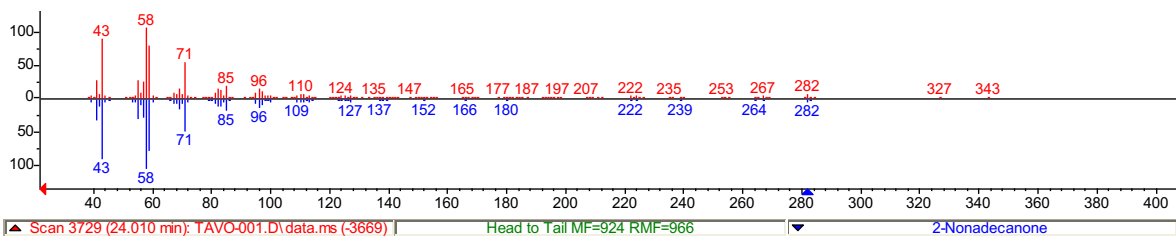

▲ Scan 3729 (24.010 min): TAVO-001.D\data.ms (-3669)

Head to Tail MF=924 RMF=966

2-Nonadecanone

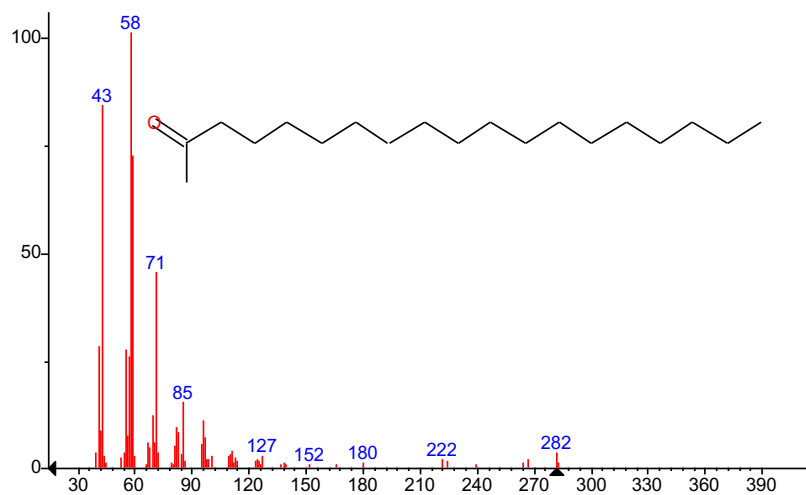

(mainlib) 2-Nonadecanone



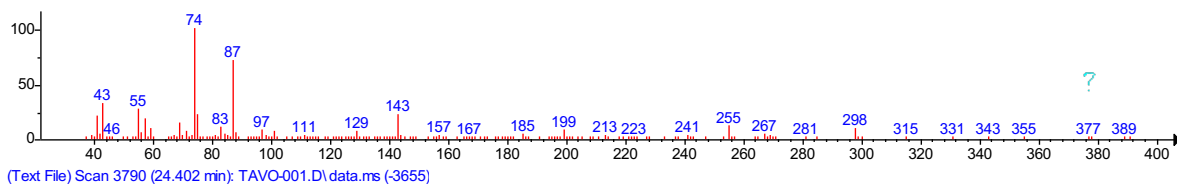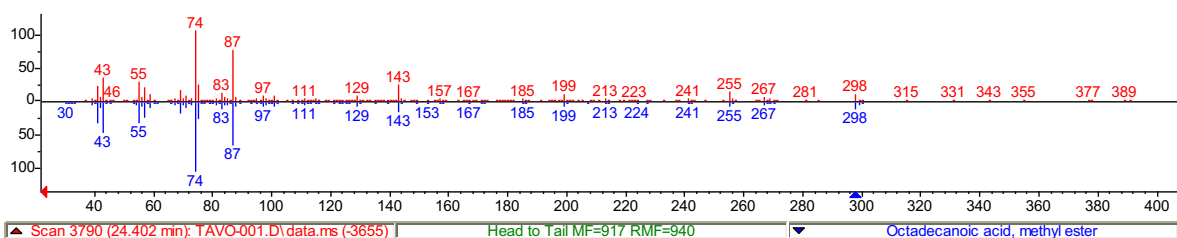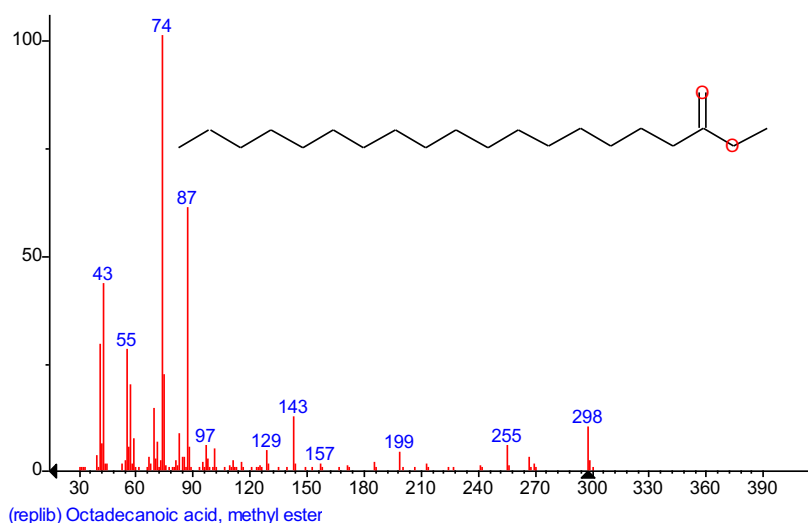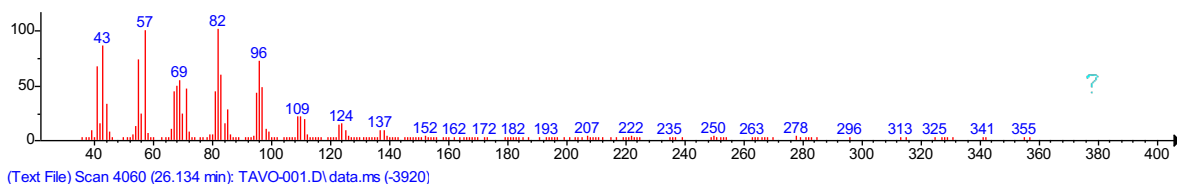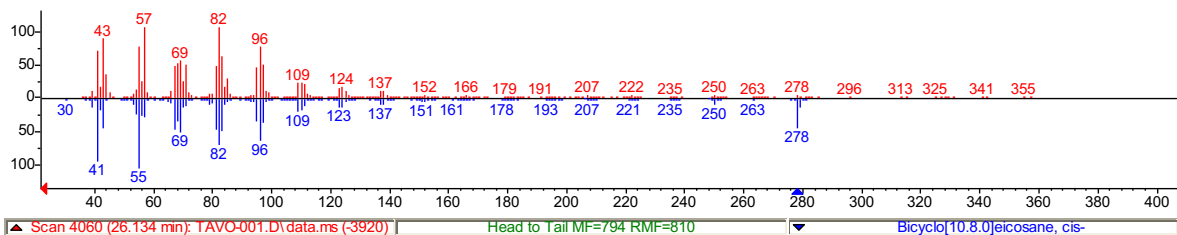

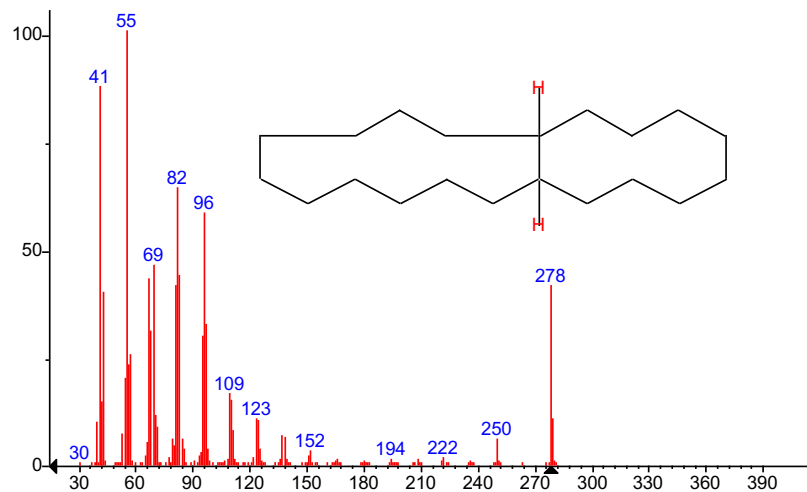

(mainlib) Bicyclo[10.8.0]eicosane, cis-

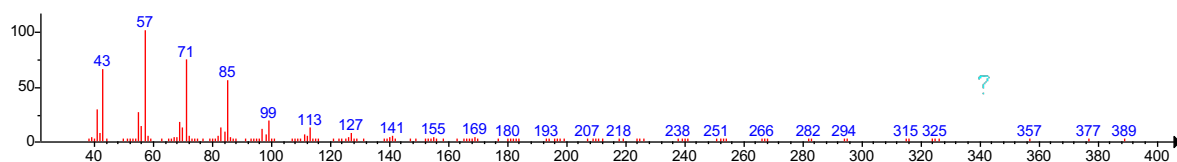

(Text File) Scan 4253 (27.372 min): TAVO-001.D\data.ms (-4160)

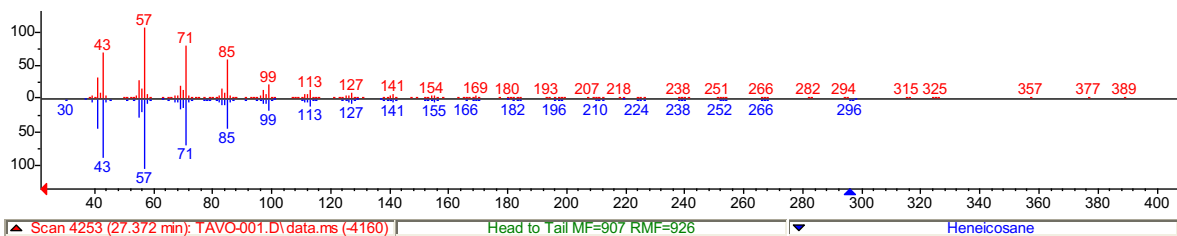

Scan 4253 (27.372 min): TAVO-001.D\data.ms (-4160)

Head to Tail MF=907 RMF=926

Heneicosane

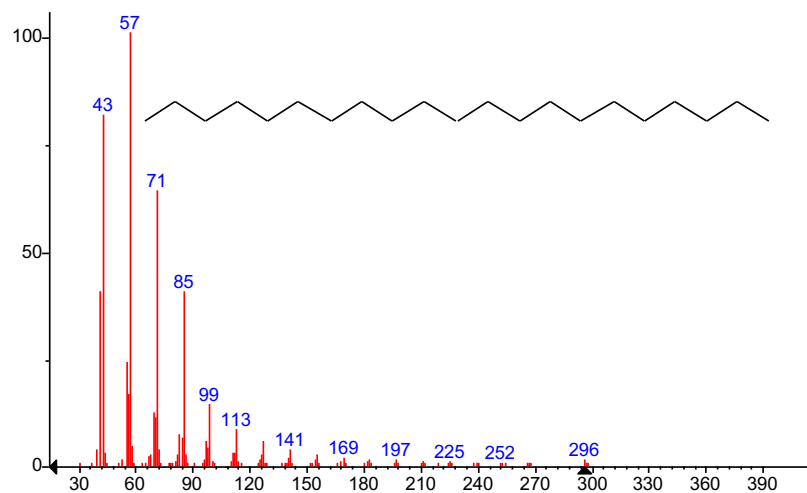

(replib) Heneicosane

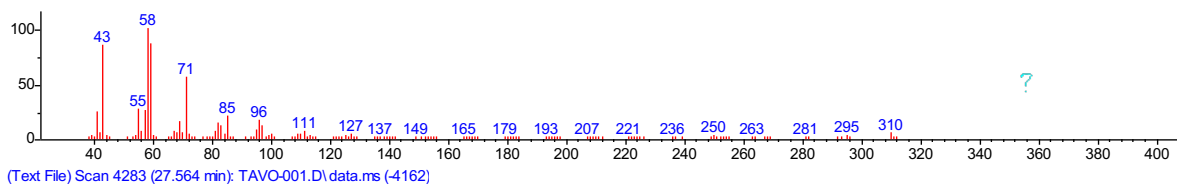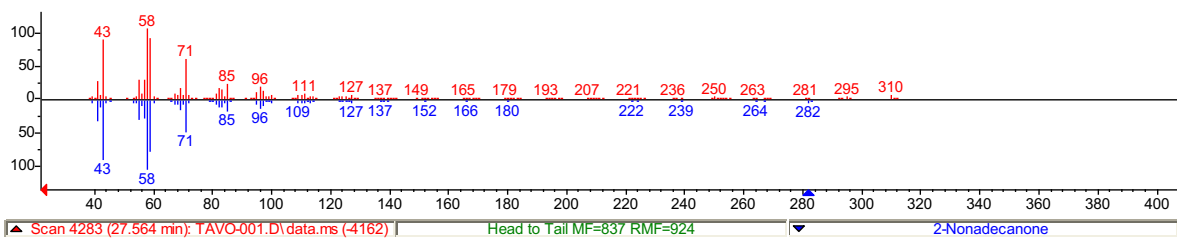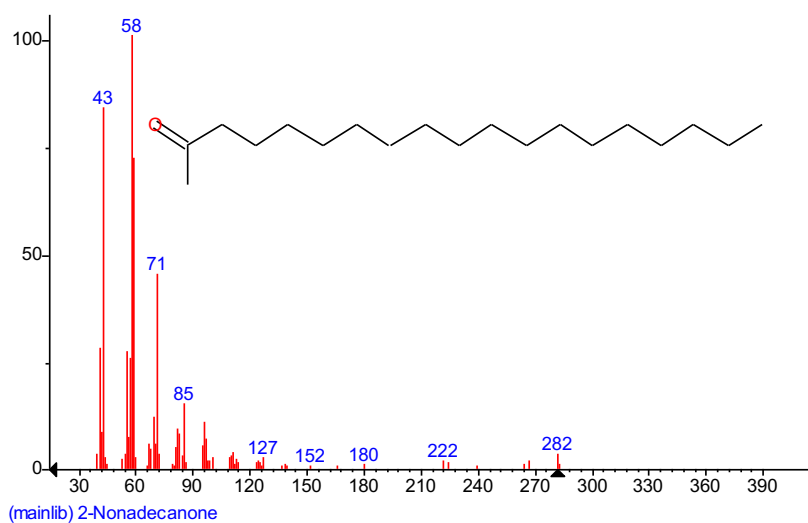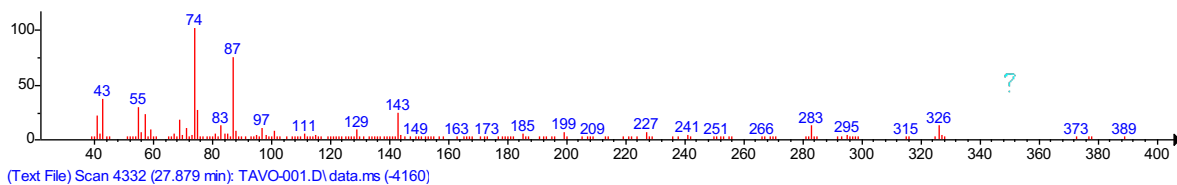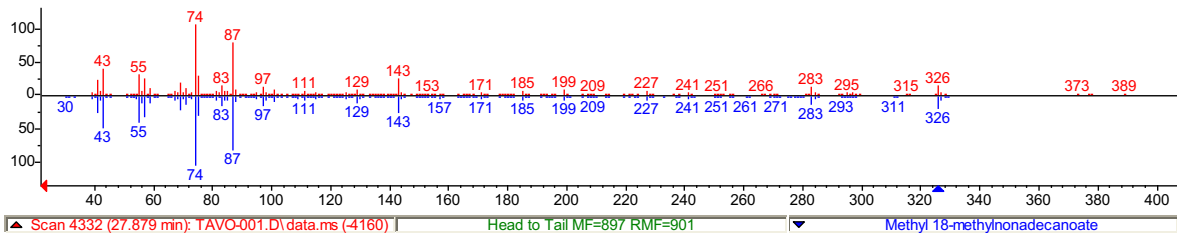

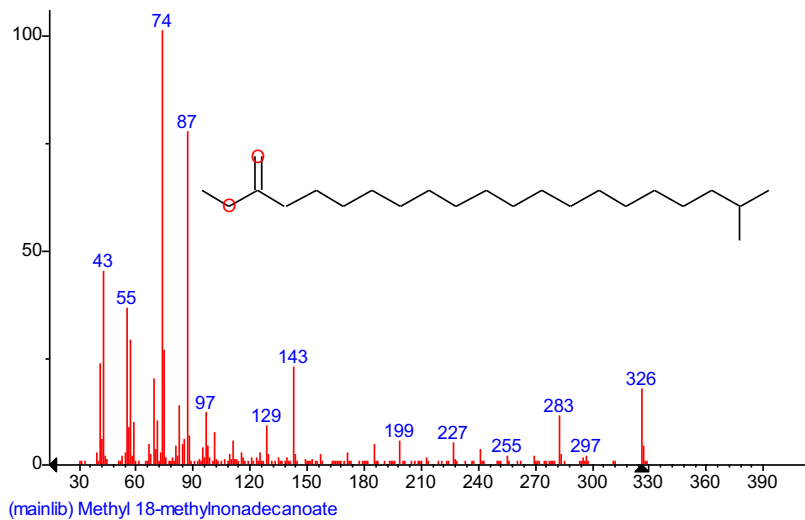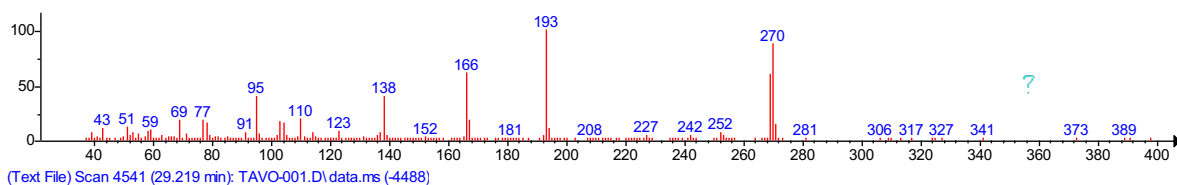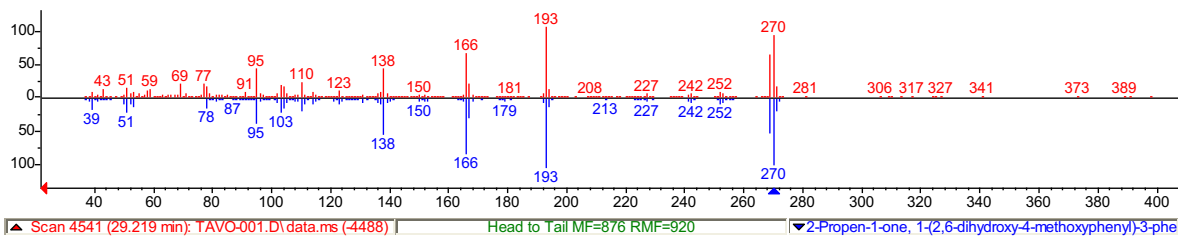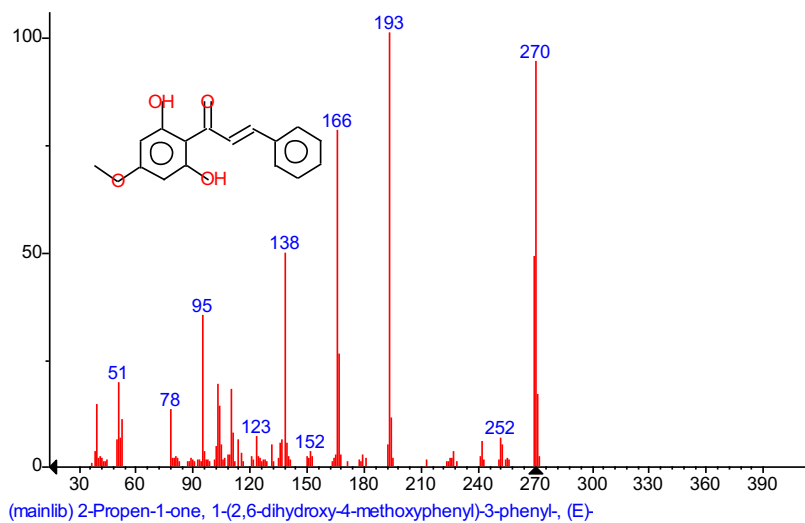

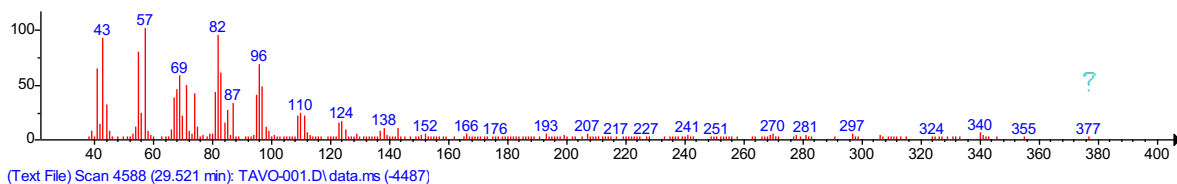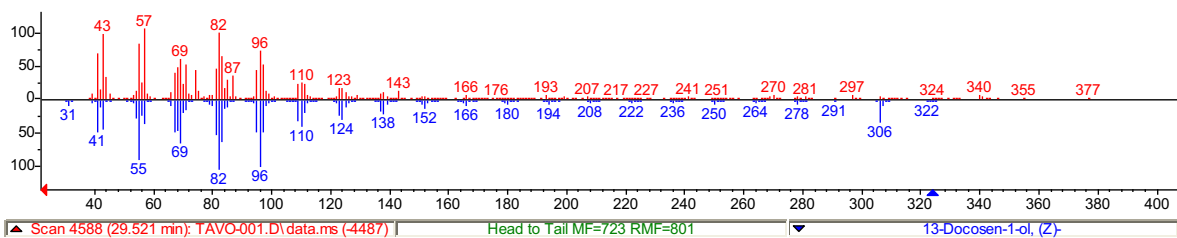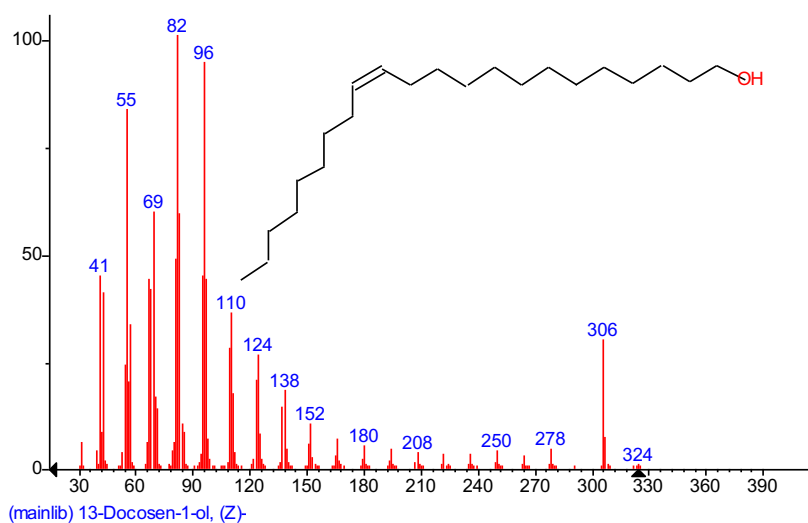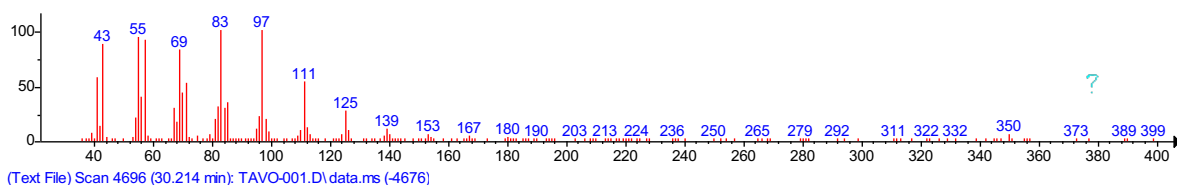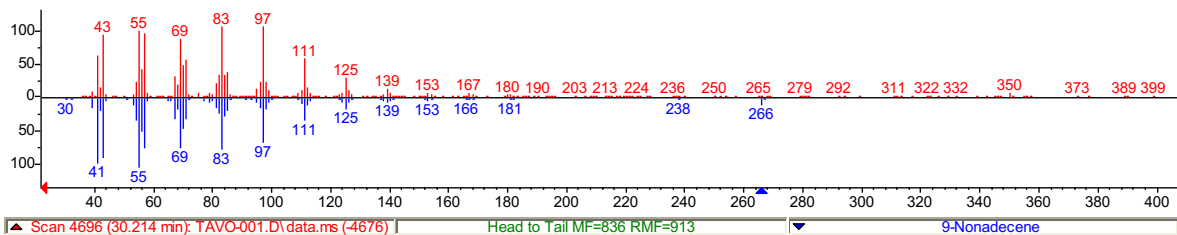

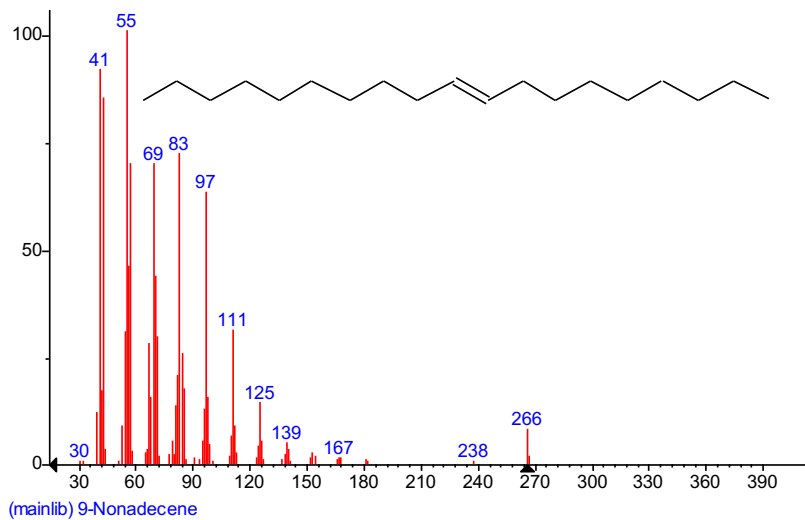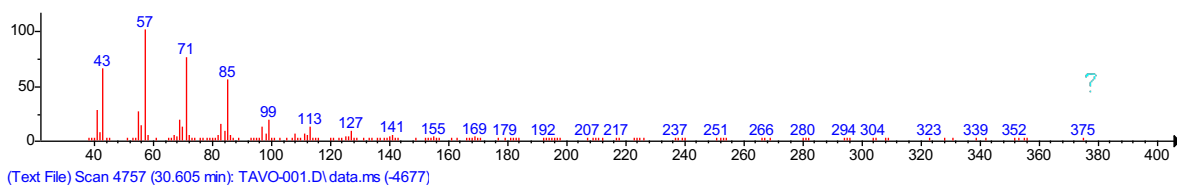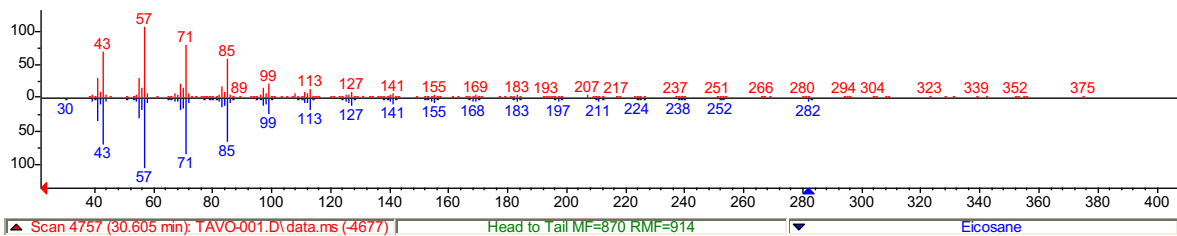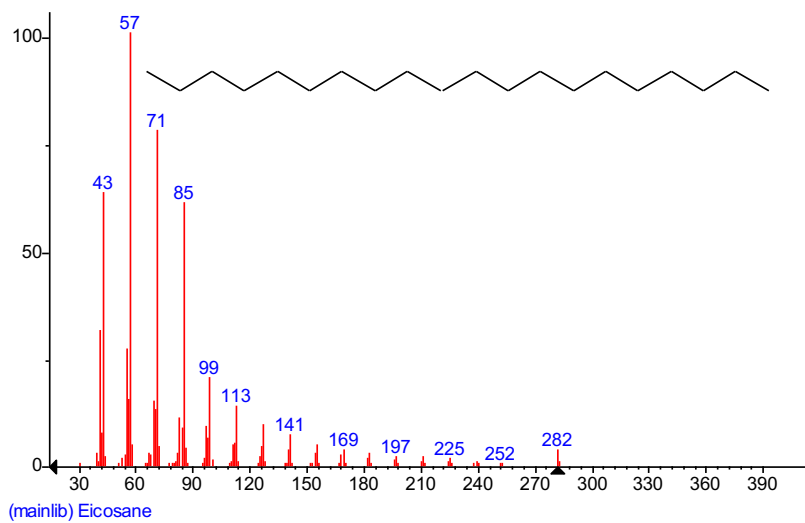

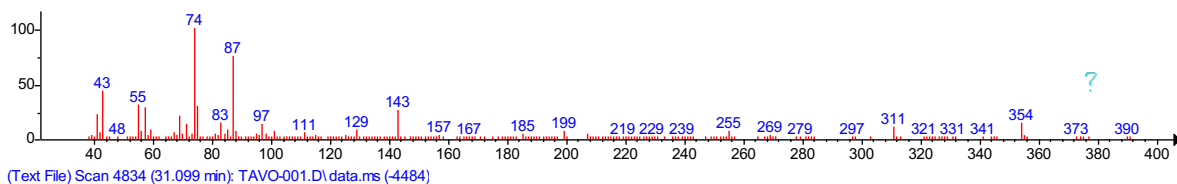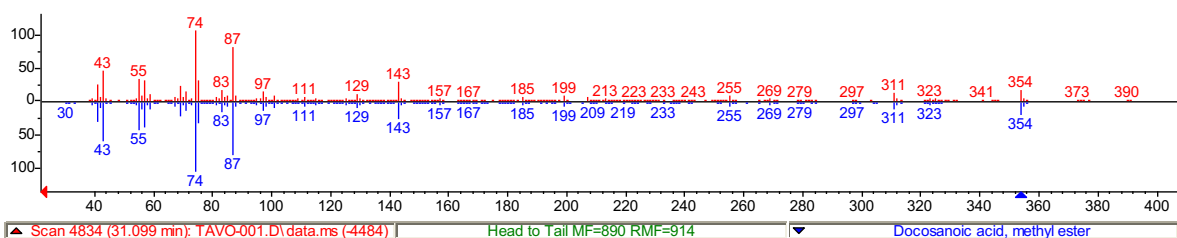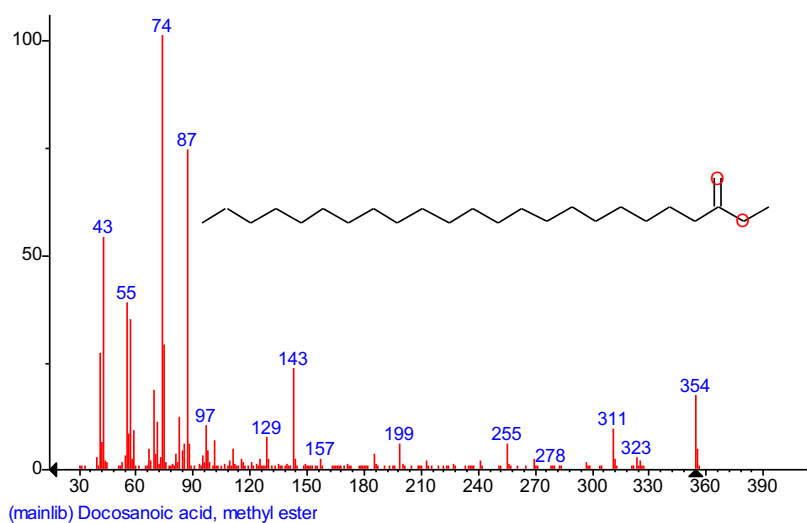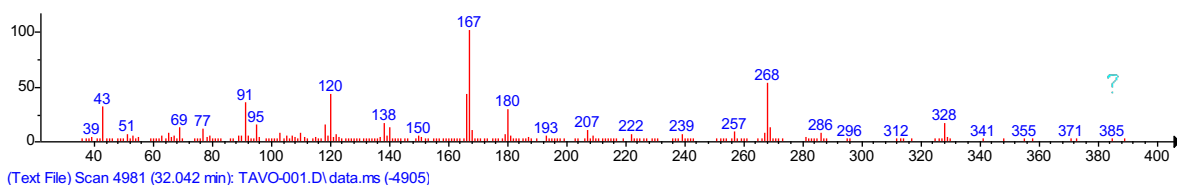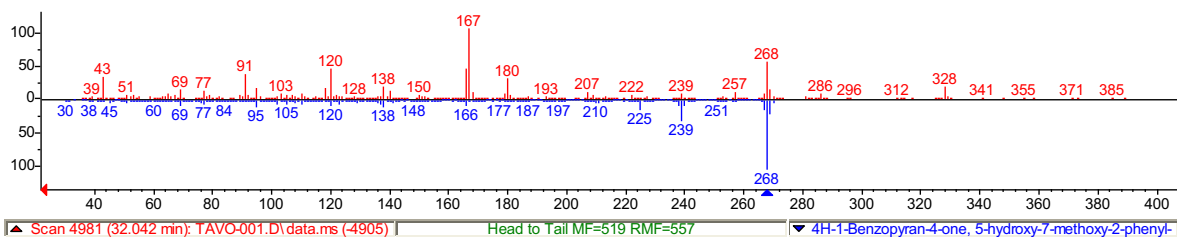

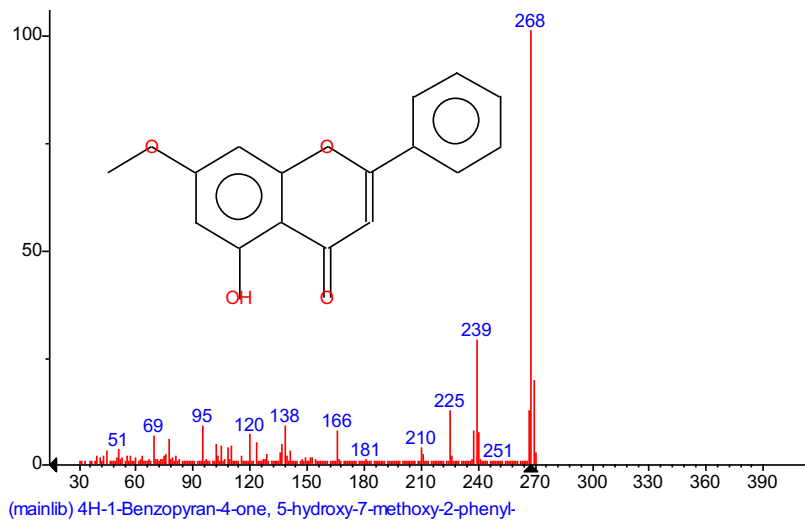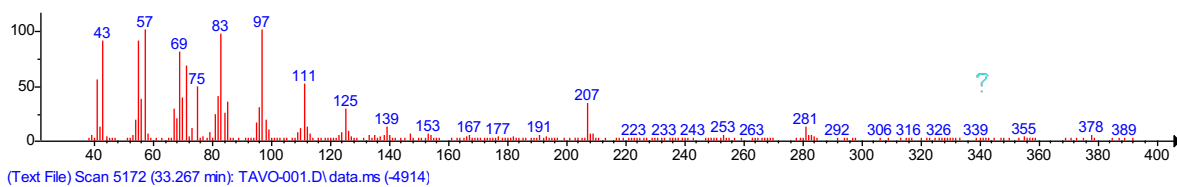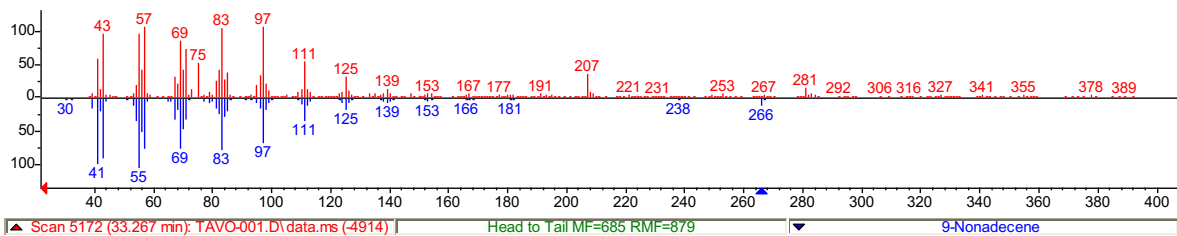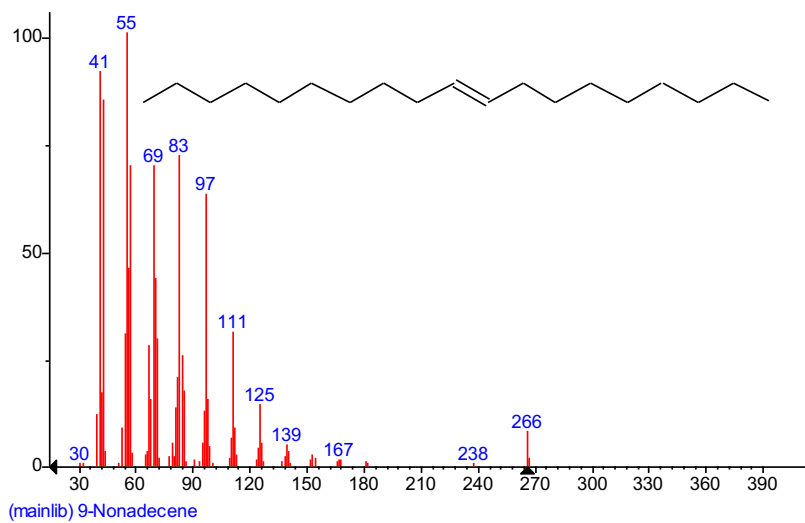



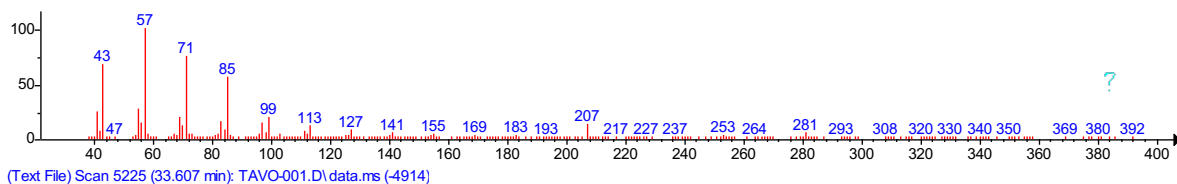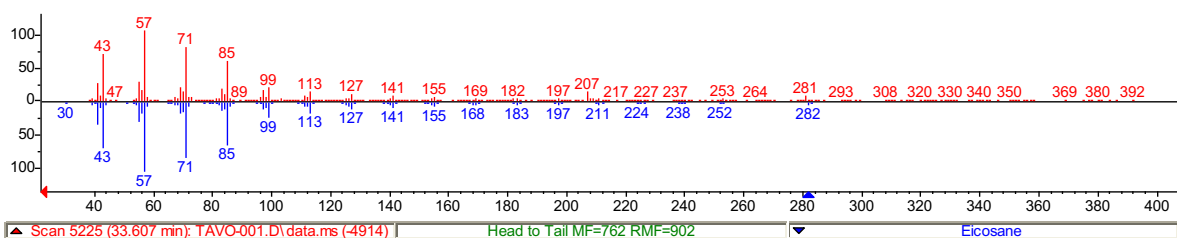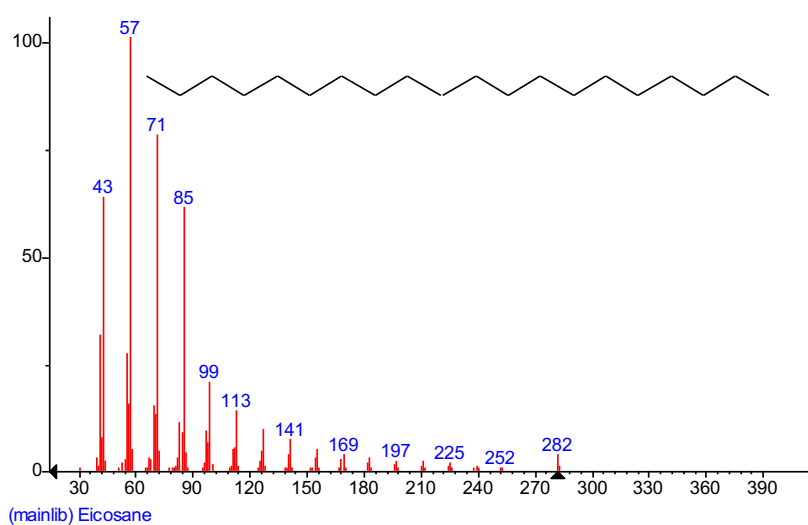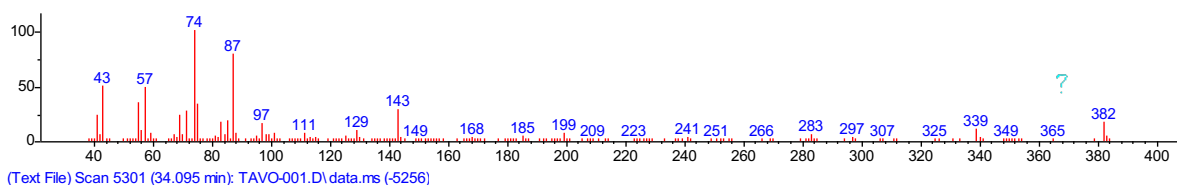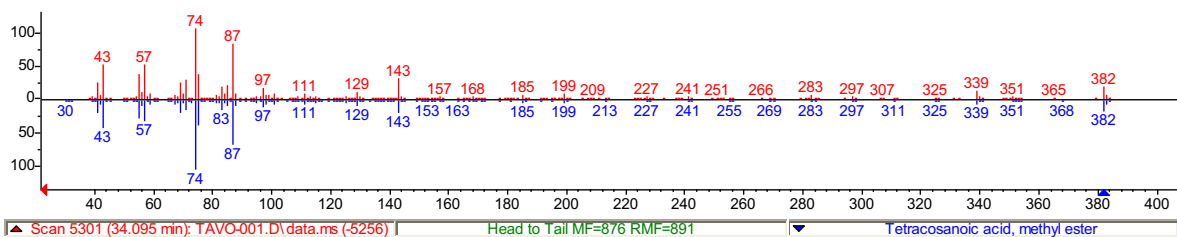

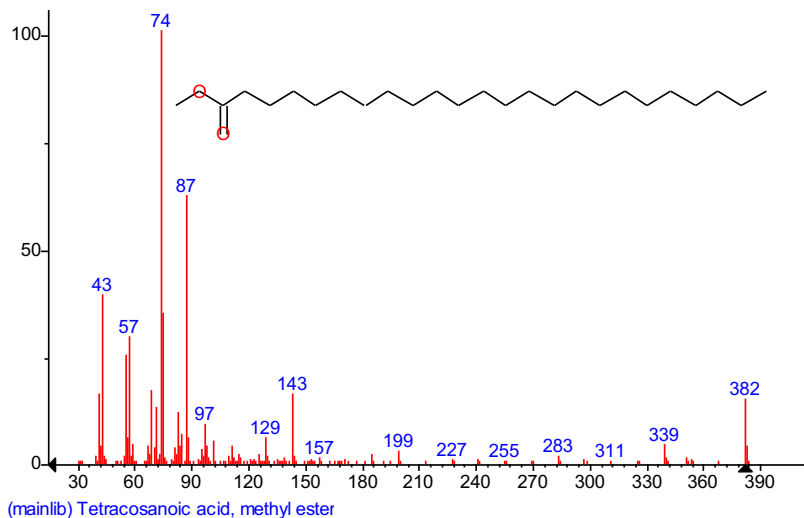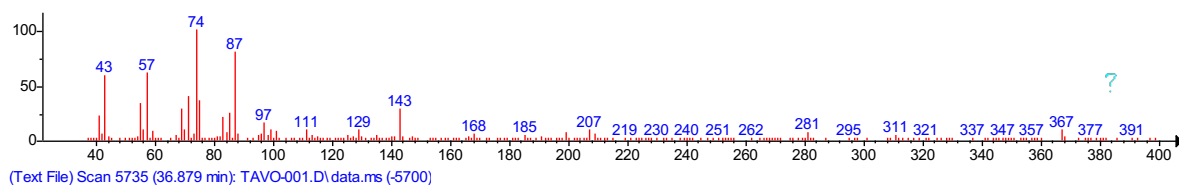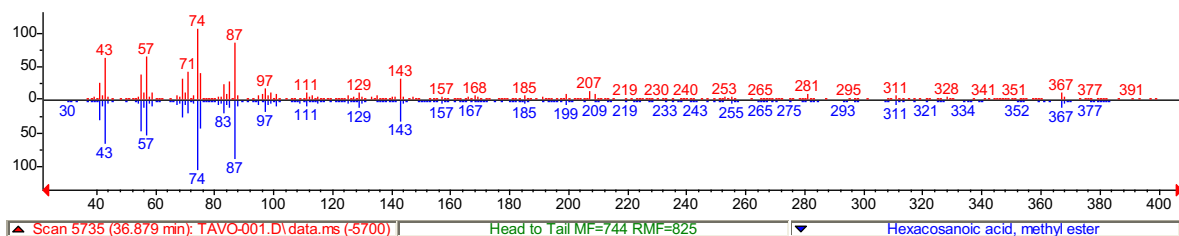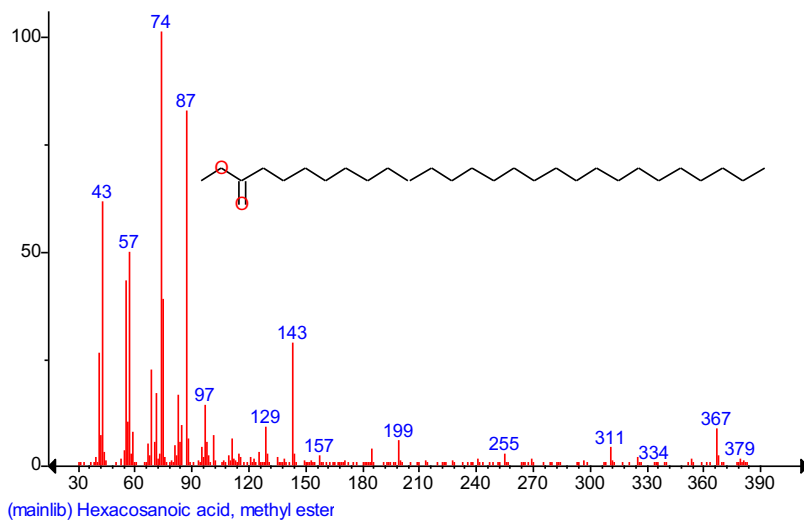

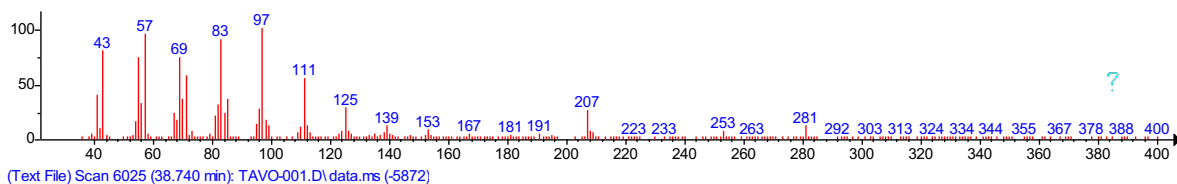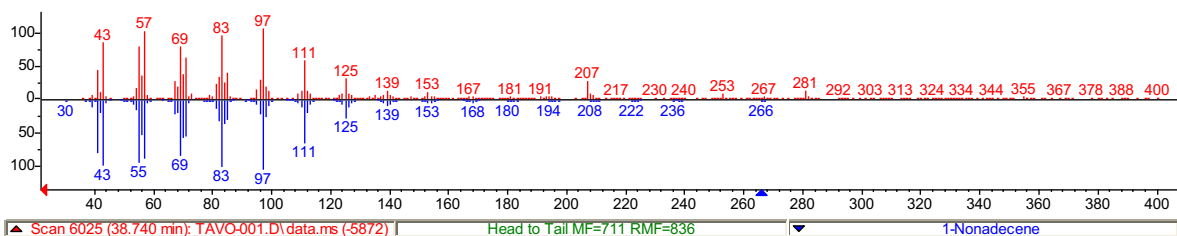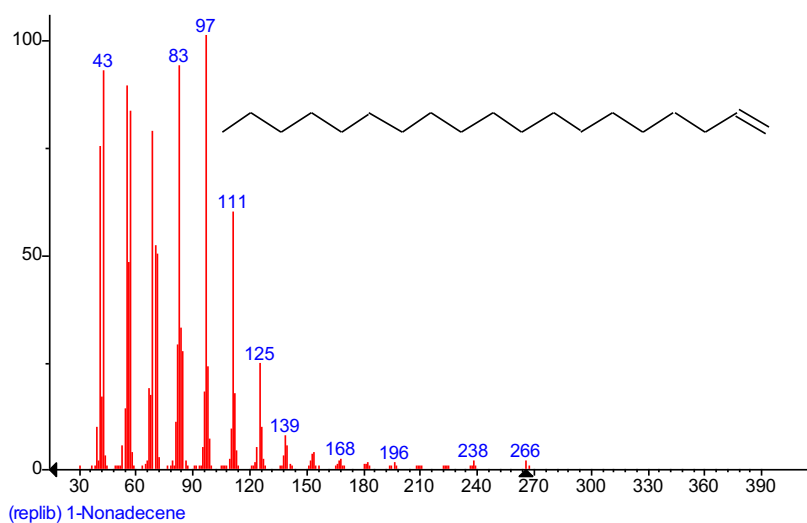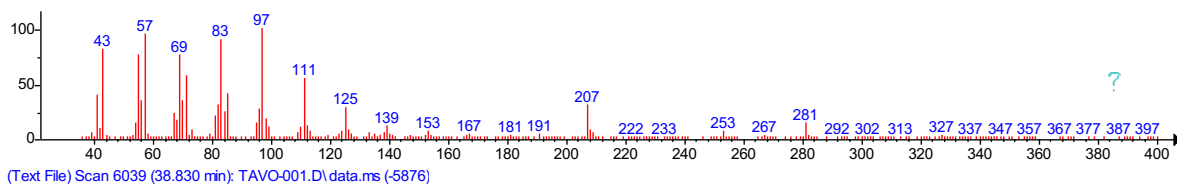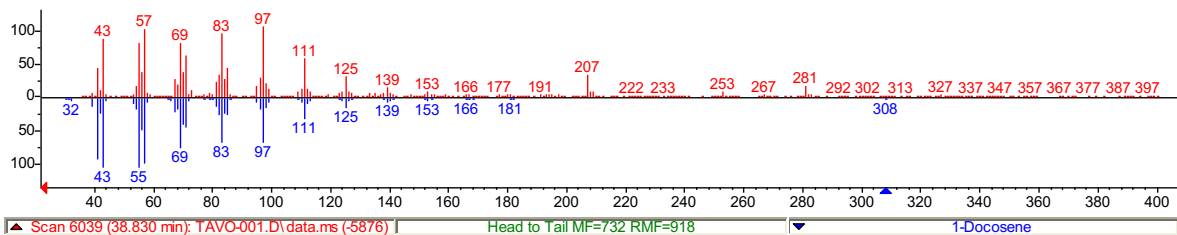

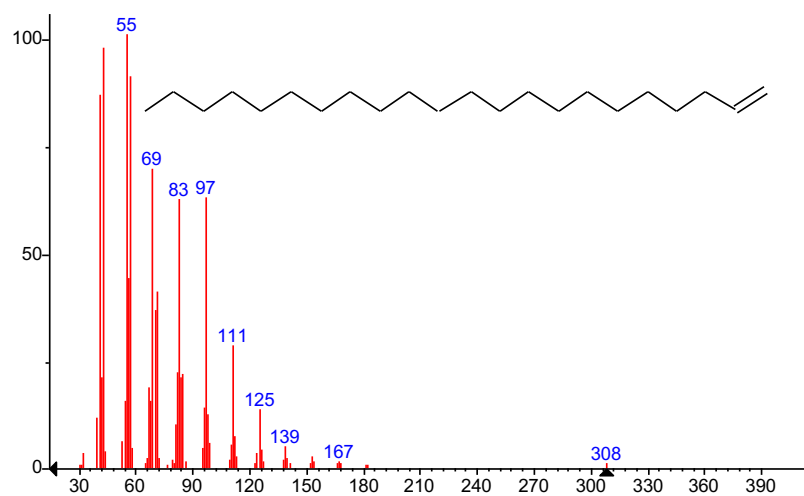

(replib) 1-Docosene

## Ethyl Acetate fraction of ChEEP.

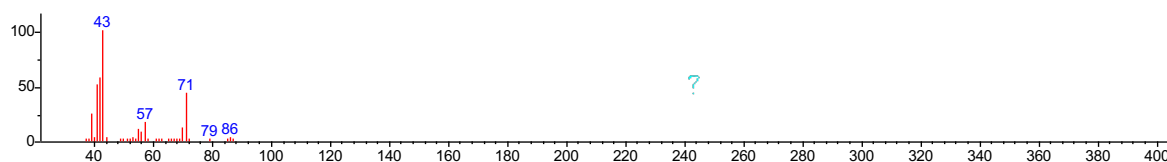

(Text File) Scan 224 (1.525 min): TAVO-002.D\data.ms (-212)

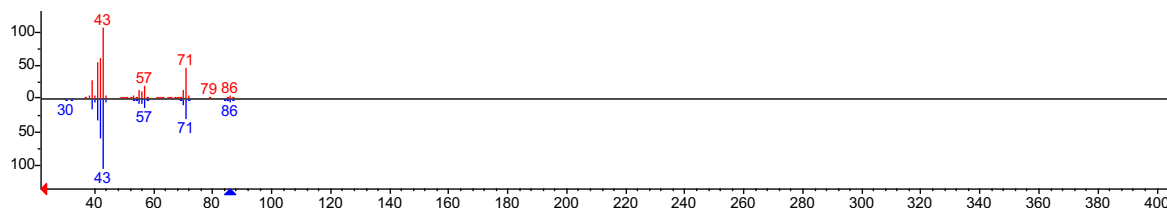

Scan 224 (1.525 min): TAVO-002.D\data.ms (-212)

Head to Tail MF=947 RMF=958

Pentane, 2-methyl-

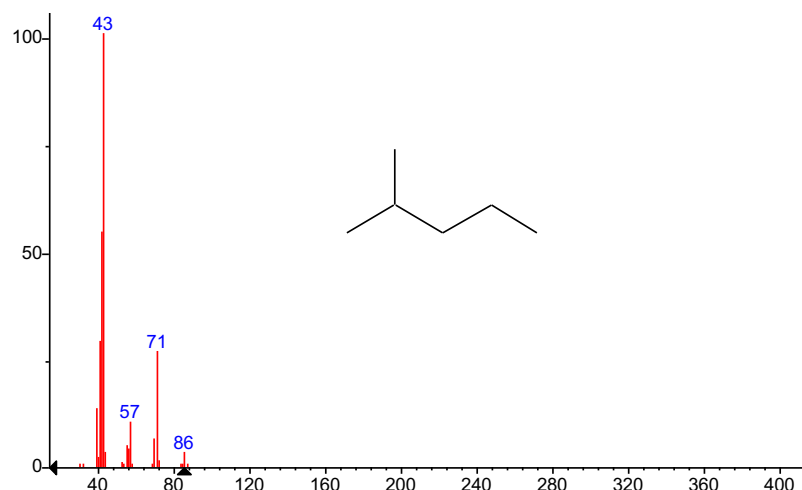

(mainlib) Pentane, 2-methyl-

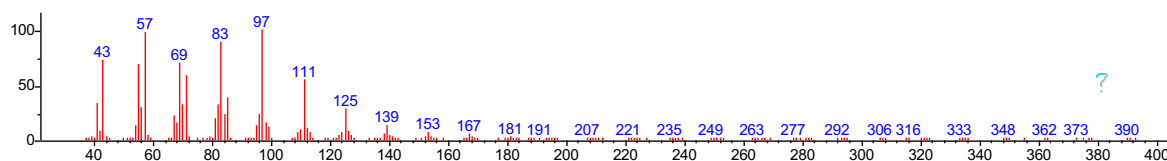

(Text File) Scan 5005 (32.196 min): TAVO-002.D\data.ms (-4971)

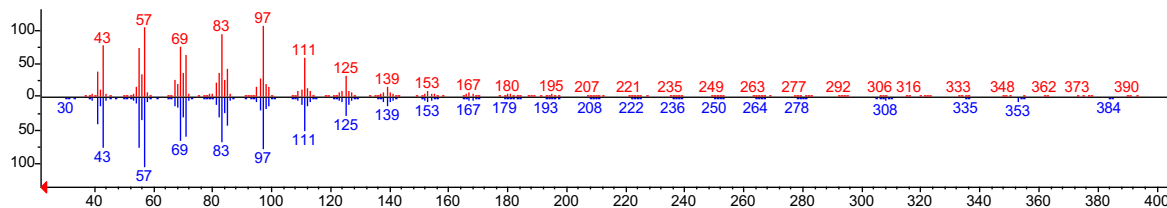

Scan 5005 (32.196 min): TAVO-002.D\data.ms (-4971)

Head to Tail MF=863 RMF=878

Docosyl trifluoroacetate

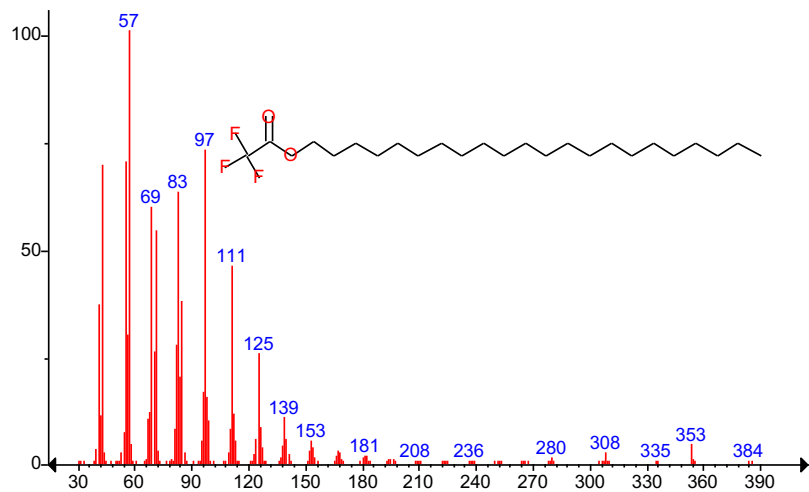

(mainlib) Docosyl trifluoroacetate

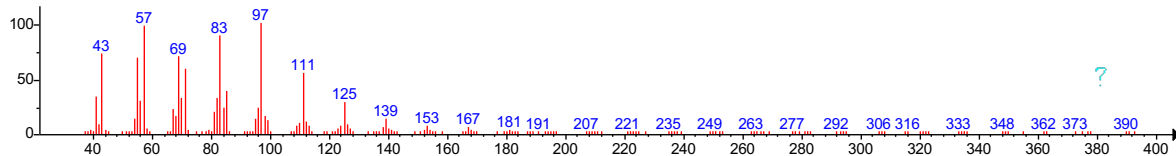

(Text File) Scan 5005 (32.196 min): TAVO-002.D\data.ms (-4971)

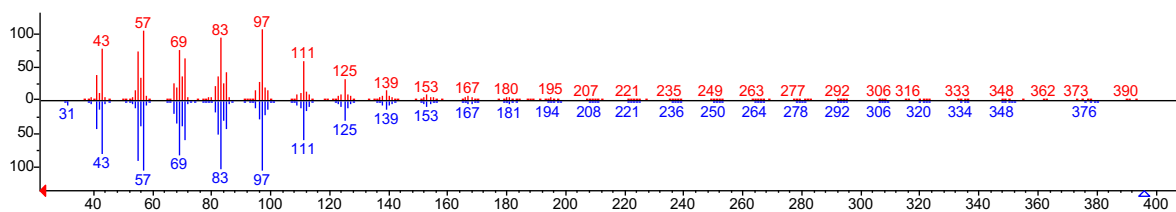

▲ Scan 5005 (32.196 min): TAVO-002.D\data.ms (-4971) | Head to Tail MF=895 RMF=907 | ▼ 1-Heptacosanol

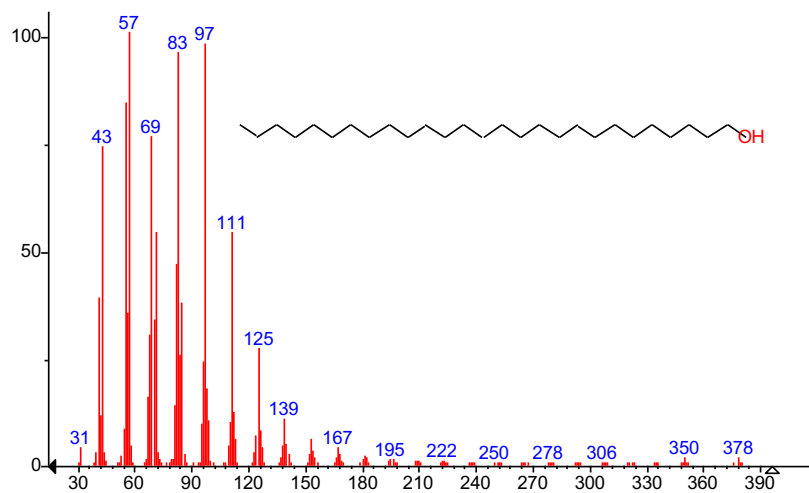

(mainlib) 1-Heptacosanol

## Derivatization of ChEEP.

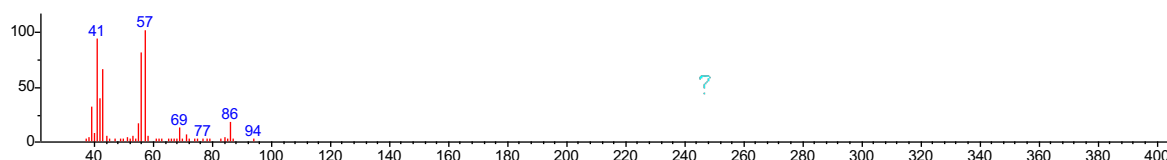

(Text File) Scan 248 (1.679 min): TAVO-003.D\data.ms (-190)

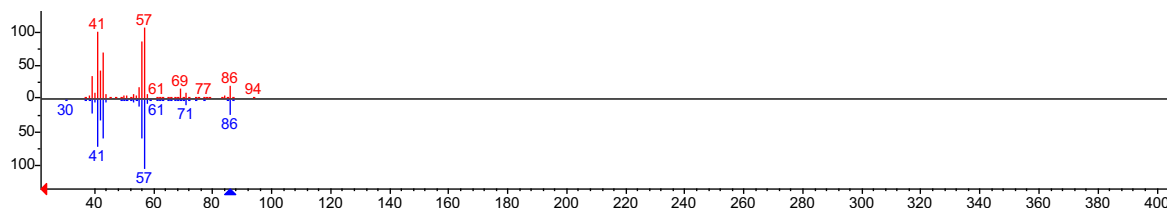

Scan 248 (1.679 min): TAVO-003.D\data.ms (-190)

Head to Tail MF=898 RMF=904

Hexane

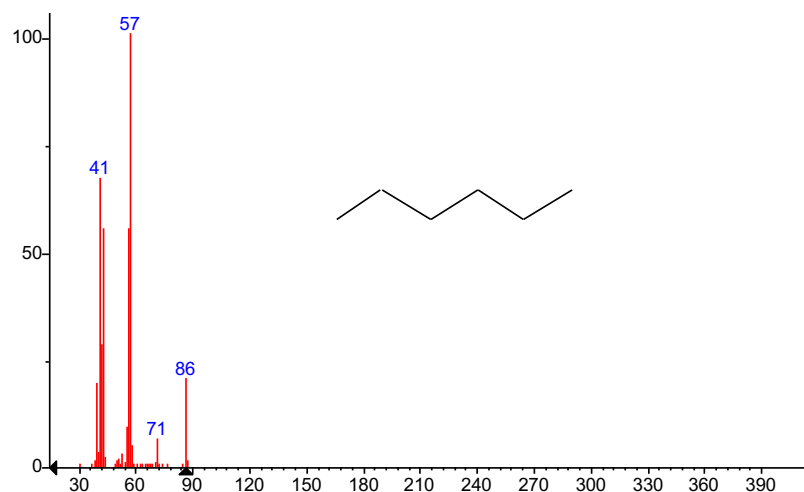

(replib) Hexane

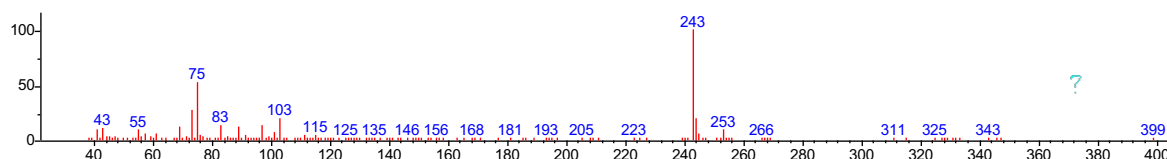

(Text File) Scan 2046 (13.213 min): TAVO-003.D\data.ms (-1832)

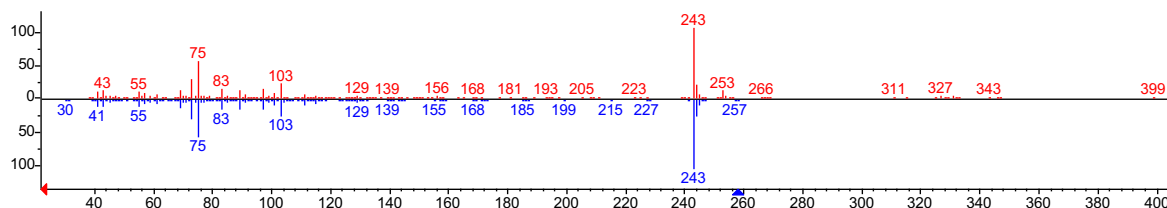

Scan 2046 (13.213 min): TAVO-003.D\data.ms (-1832)

Head to Tail MF=794 RMF=891

Silane, (dodecyloxy)trimethyl-

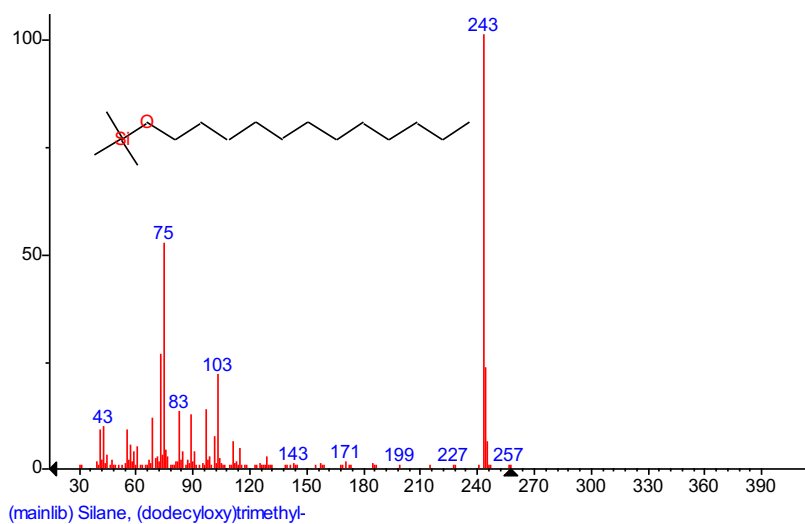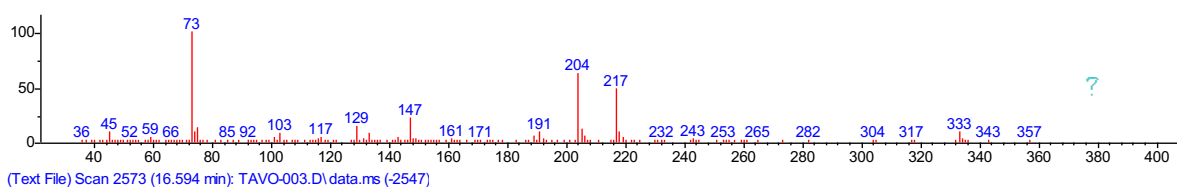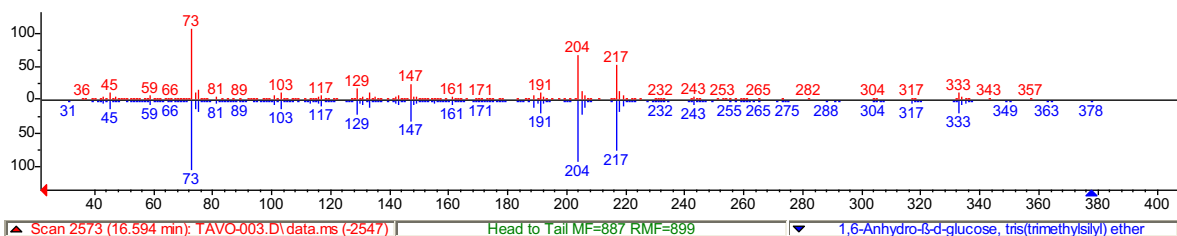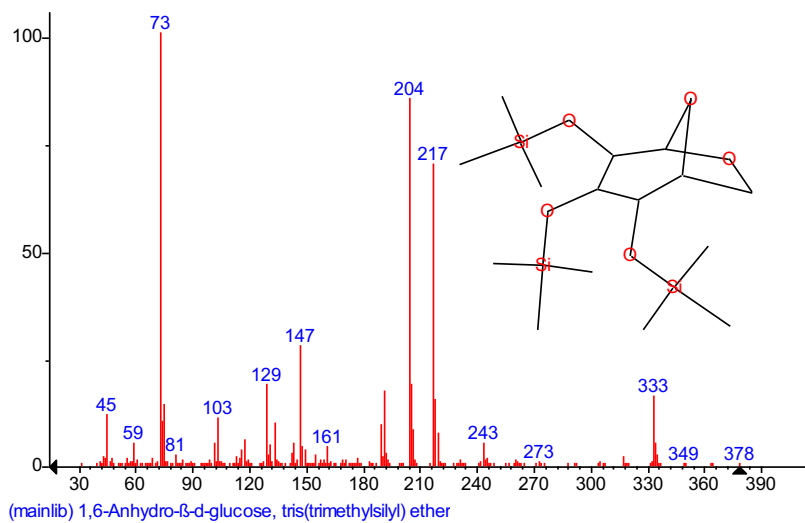



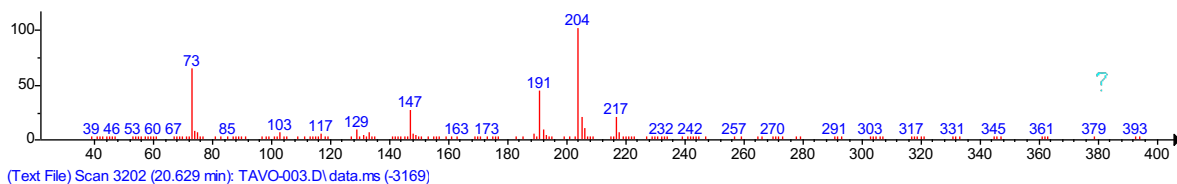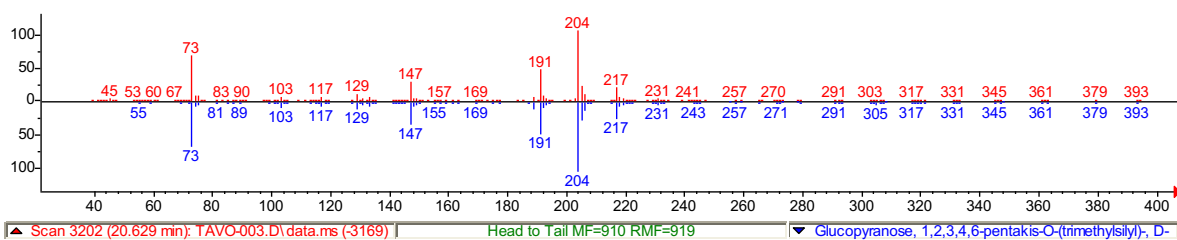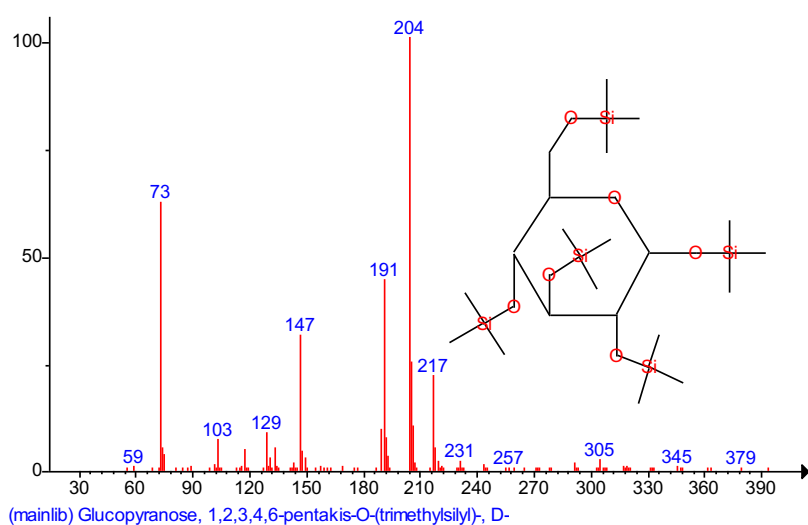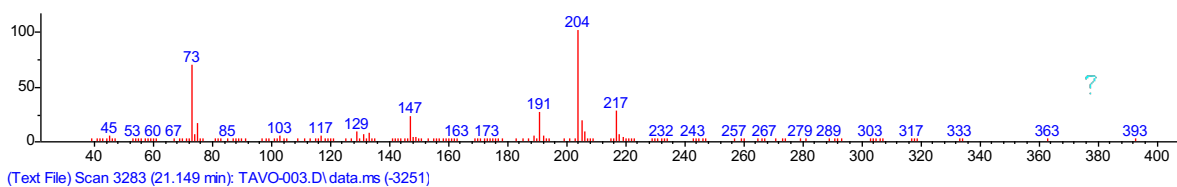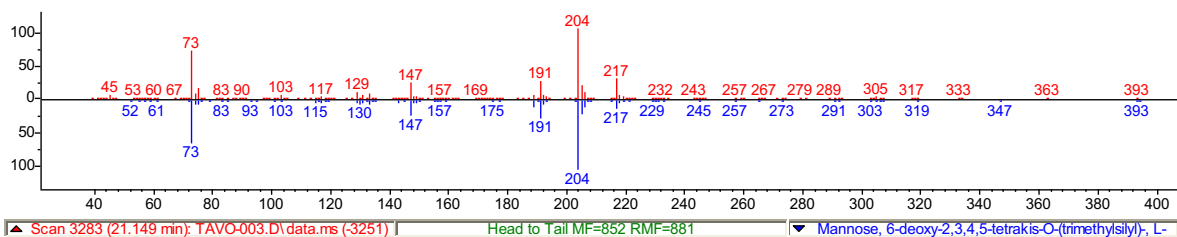

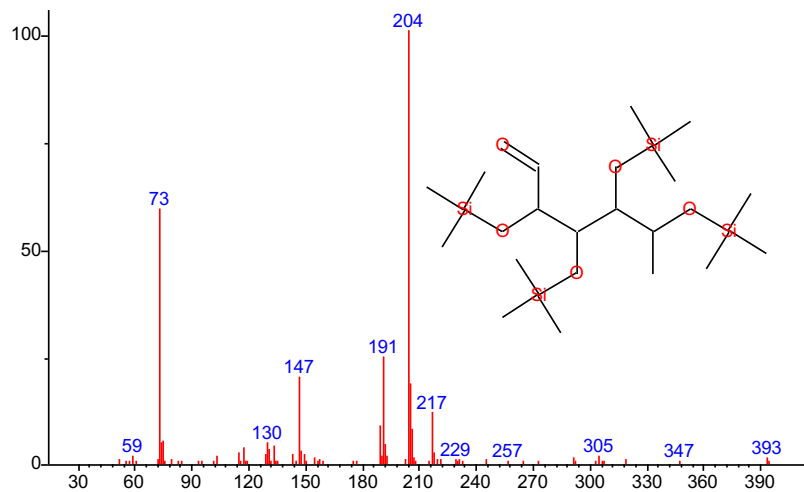

(replib) Mannose, 6-deoxy-2,3,4,5-tetrakis-O-(trimethylsilyl)-, L-

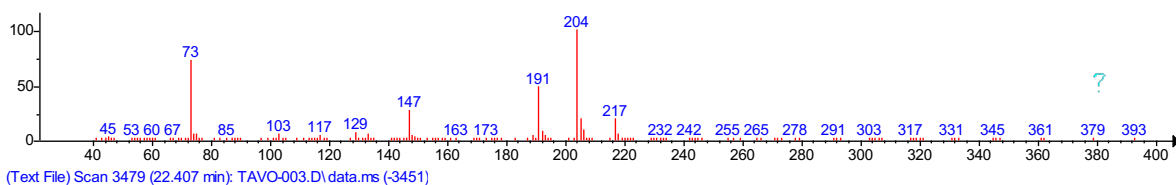

(Text File) Scan 3479 (22.407 min): TAVO-003.D\data.ms (-3451)

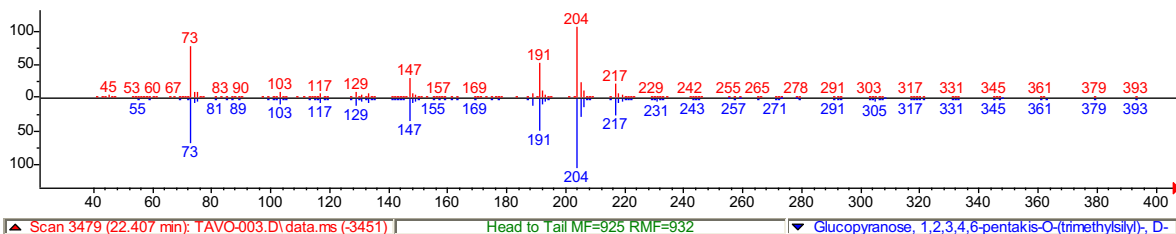

Scan 3479 (22.407 min): TAVO-003.D\data.ms (-3451) | Head to Tail MF=925 RMF=932 | Glucopyranose, 1,2,3,4,6-pentakis-O-(trimethylsilyl)-, D-

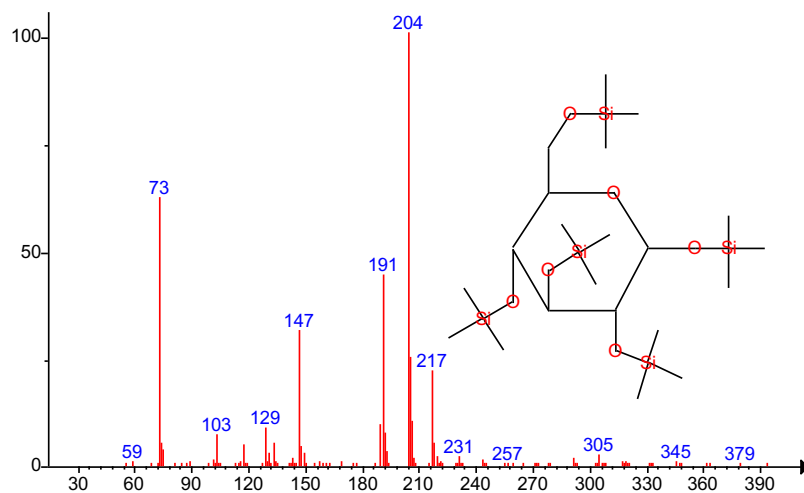

(mainlib) Glucopyranose, 1,2,3,4,6-pentakis-O-(trimethylsilyl)-, D-

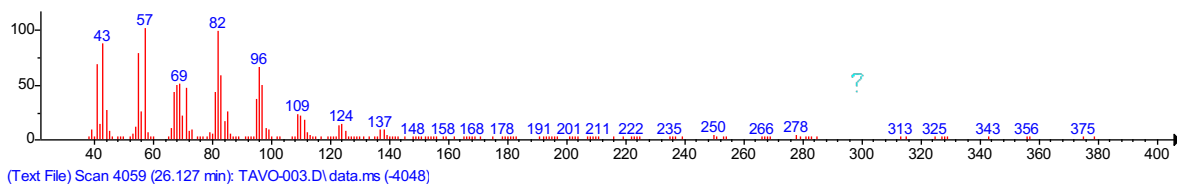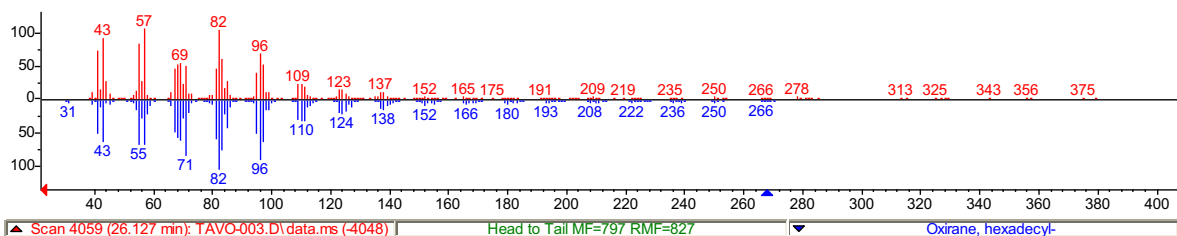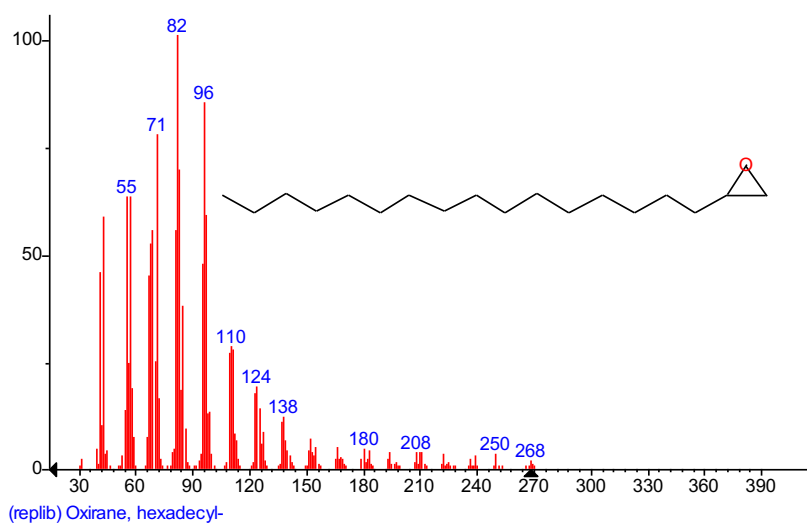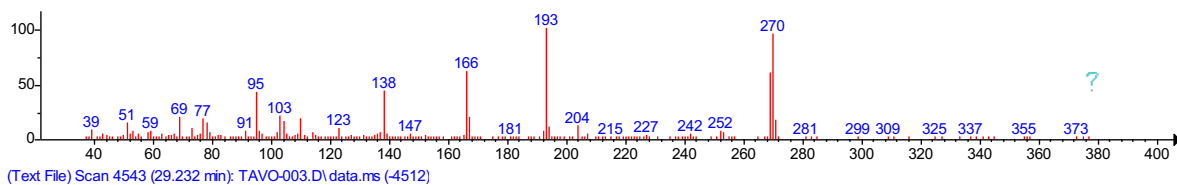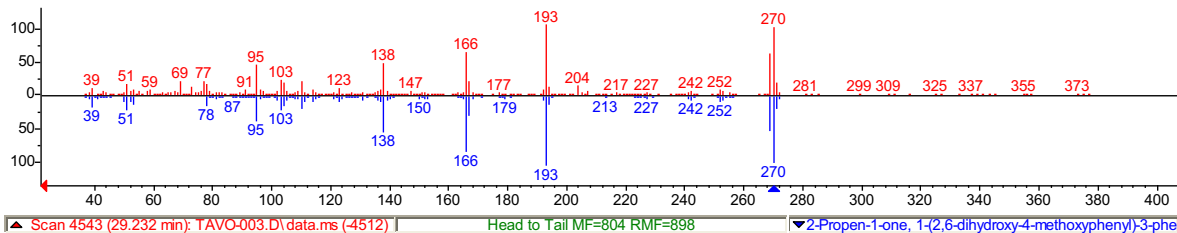

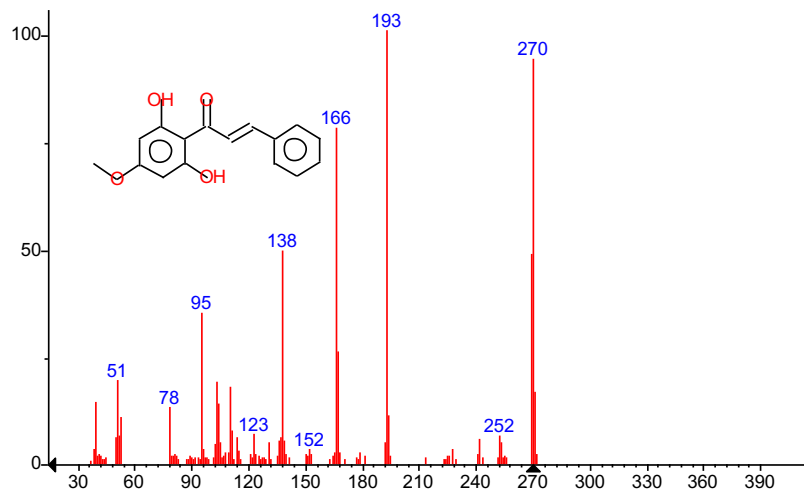

(mainlib) 2-Propen-1-one, 1-(2,6-dihydroxy-4-methoxyphenyl)-3-phenyl-, (E)-

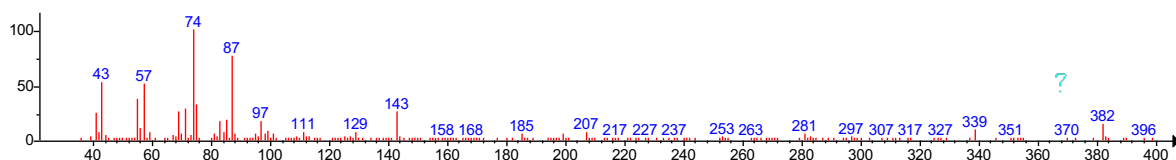

(Text File) Scan 5299 (34.082 min): TAVO-003.D\data.ms (-5287)

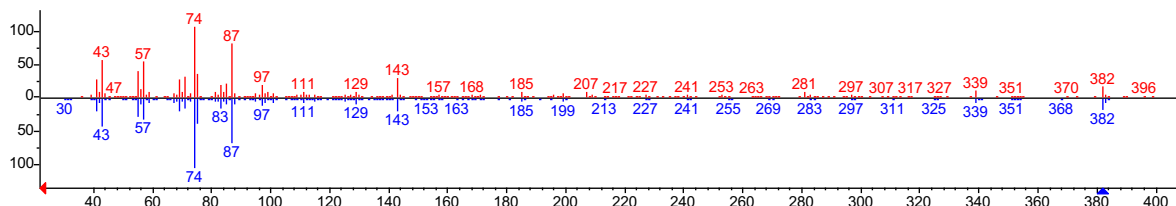

Scan 5299 (34.082 min): TAVO-003.D\data.ms (-5287) | Head to Tail MF=777 RMF=864 | Tetracosanoic acid, methyl ester

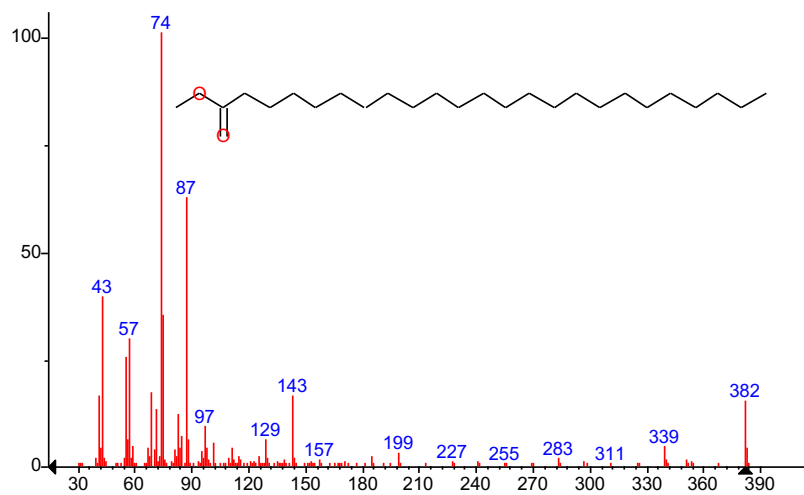

(mainlib) Tetracosanoic acid, methyl ester

**Figure S2.** HPLC–DAD chromatograms of the fractions obtained from the EA fraction of ChEEP (a-w).

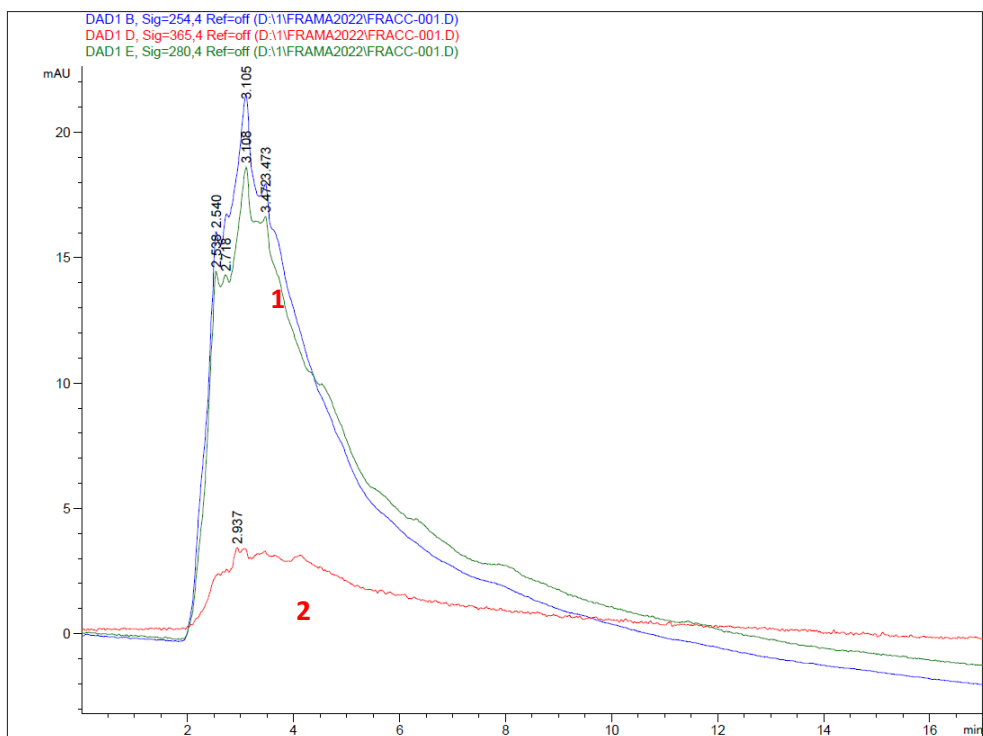

a.- Chromatogram fraction one (1.- Catechol, 2.- Catechine).

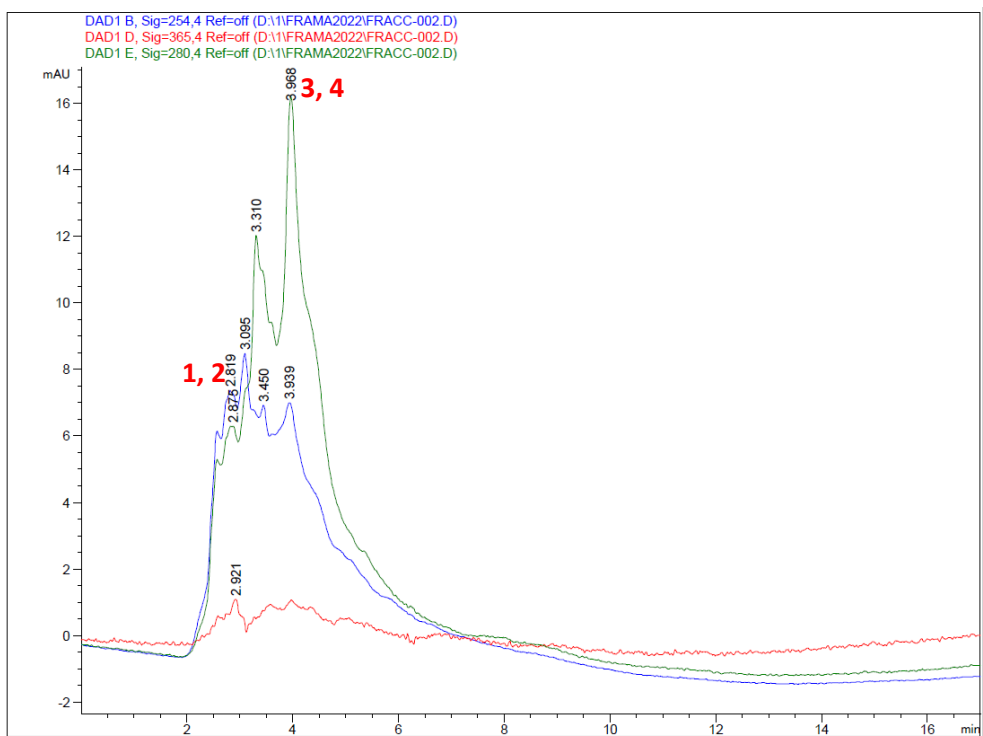

b.- Chromatogram fraction two (1.- Catechin, 2.- Catechol, 3.- Naringenin, 4.- Naringin).

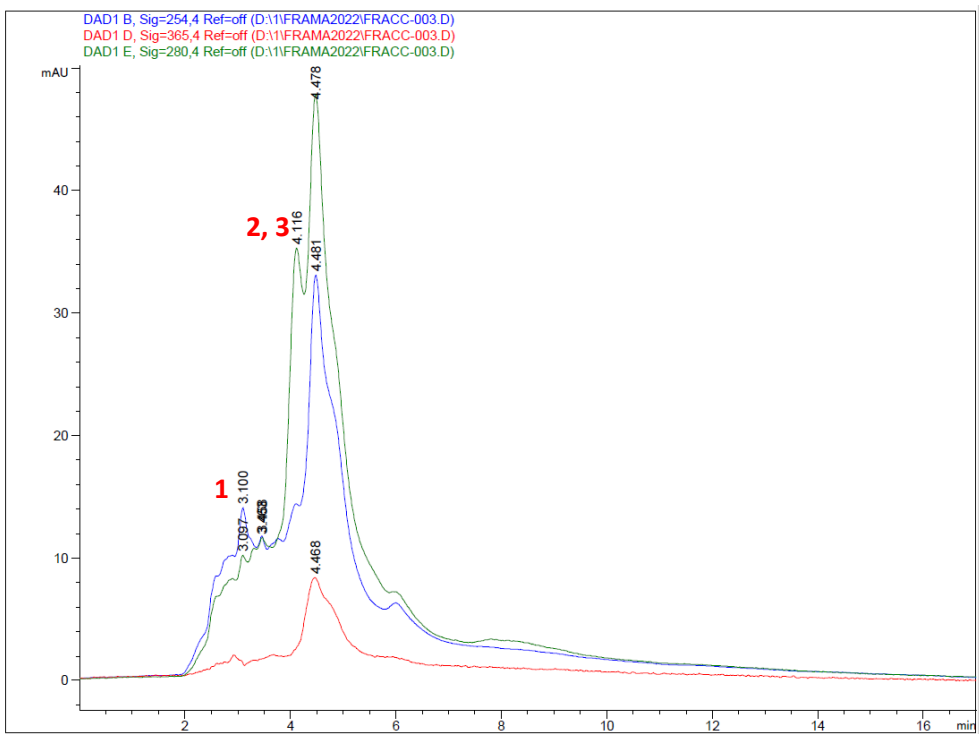

c.- Chromatogram fraction three (1.- Catechin, 2.- Naringin, 3.- Naringenin).

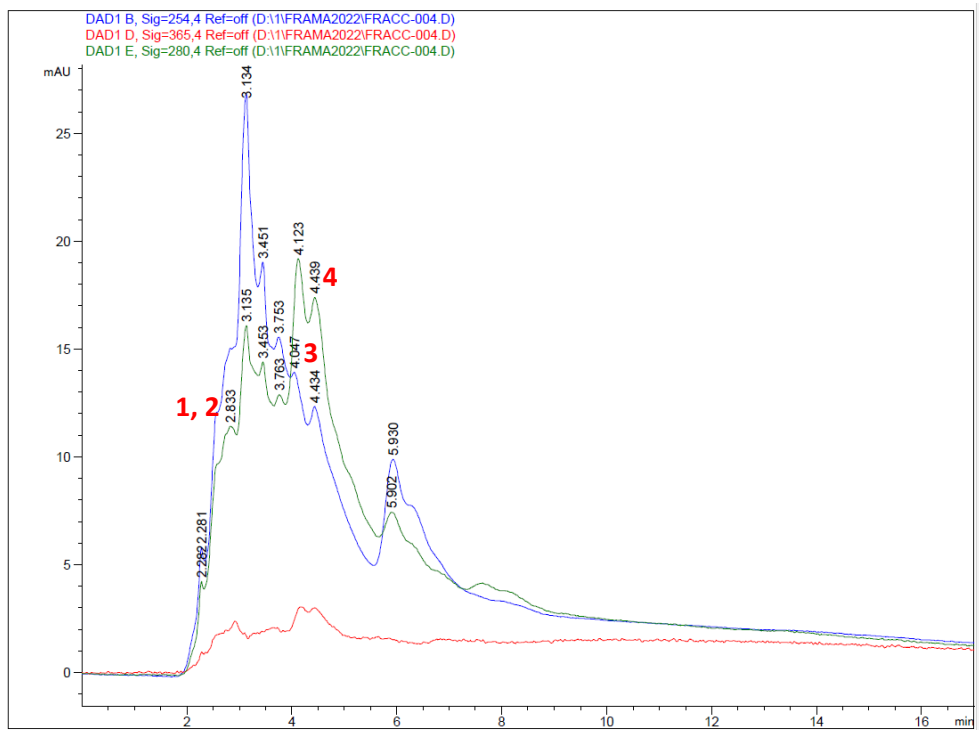

d.- Chromatogram fraction four (1.- Catechin, 2.- Catechol, 3.- Naringin, 4.- Naringenin).

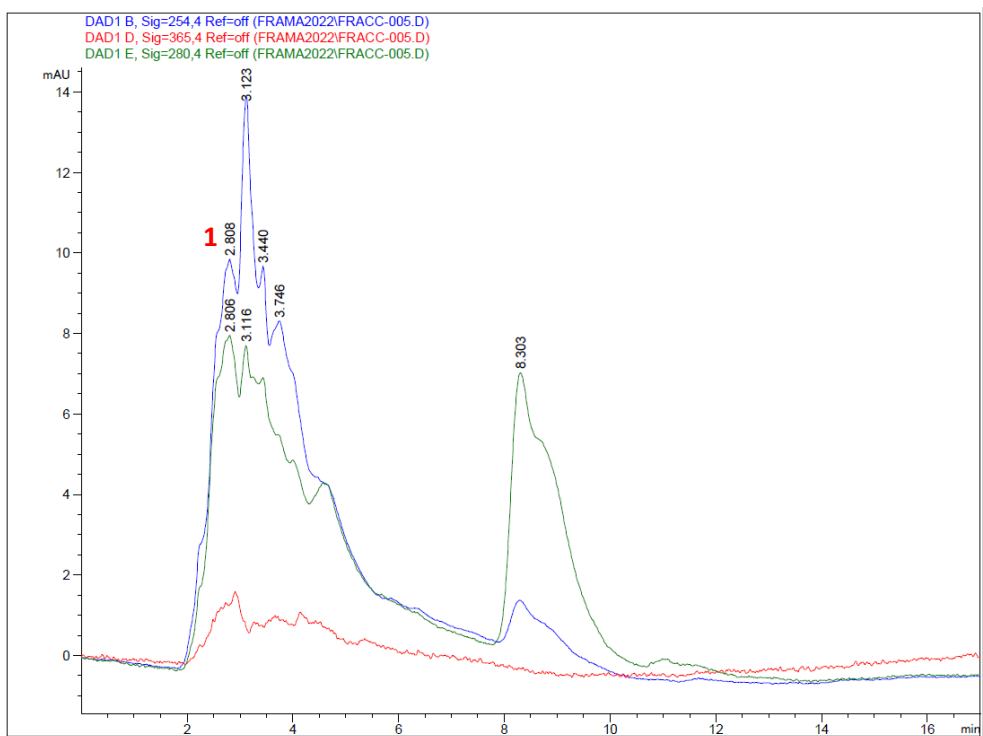

e.- Chromatogram fraction five (1.- Catechin).

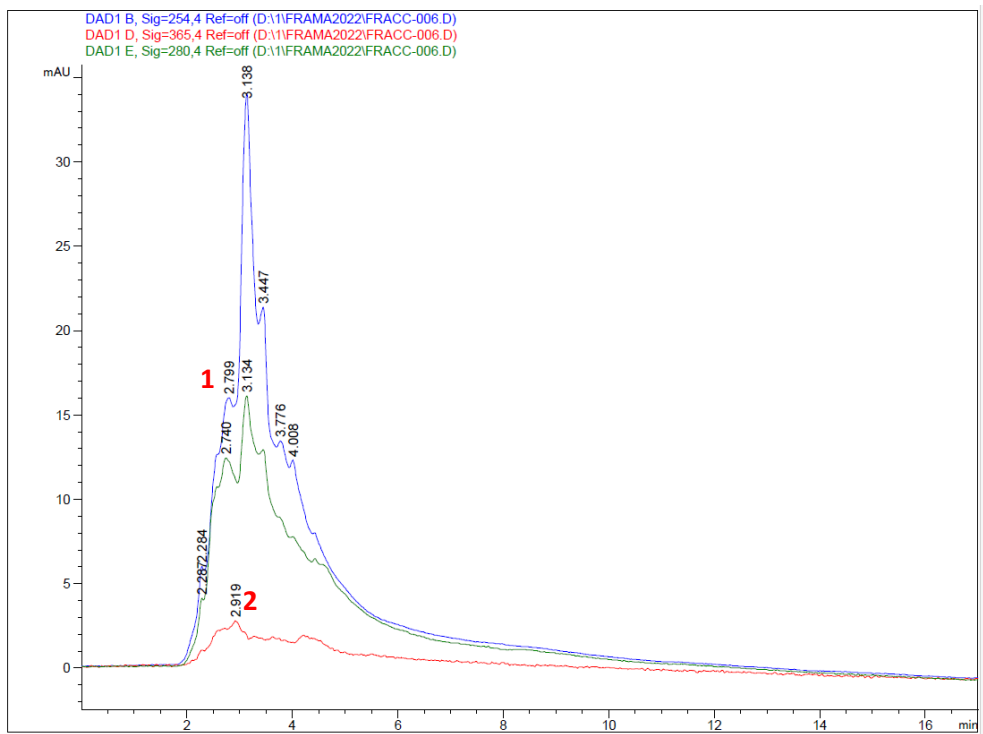

f.- Chromatogram fraction six (1.- Catechin, 2.- Catechol).

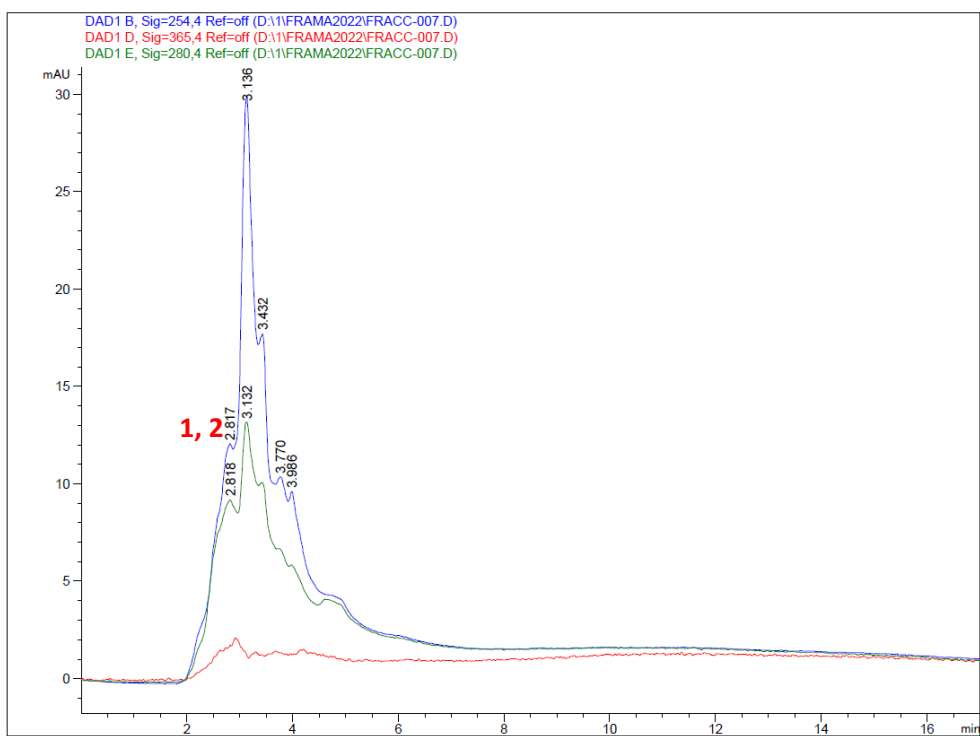

g.- Chromatogram fraction seven (1.- Catechin, 2.- Catechol).

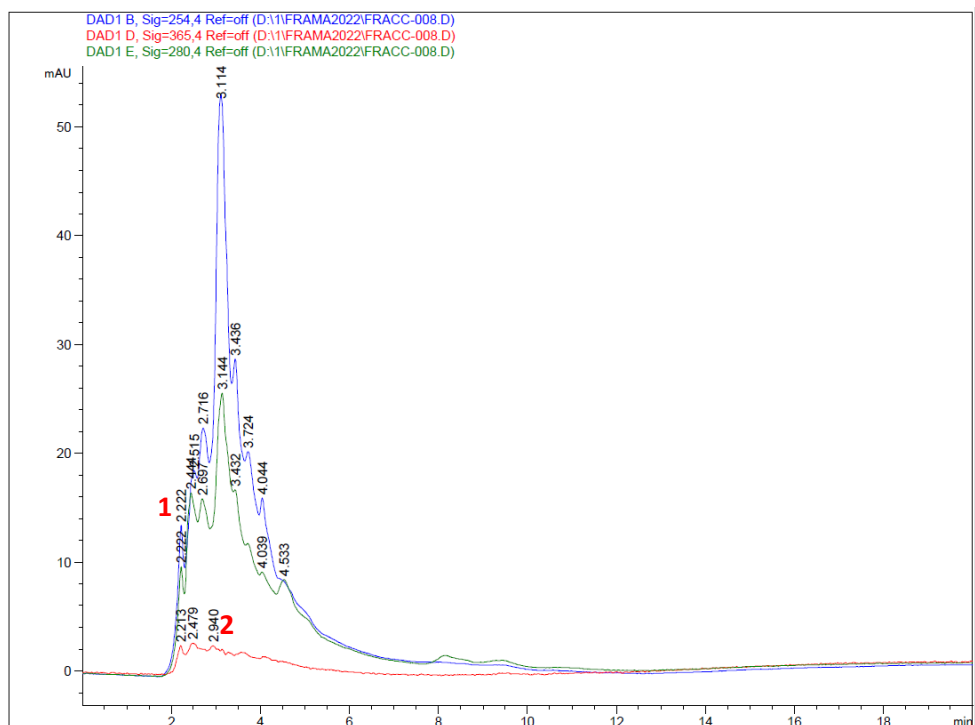

h.- Chromatogram fraction eight (1.- Catechin, 2.- Catechol).



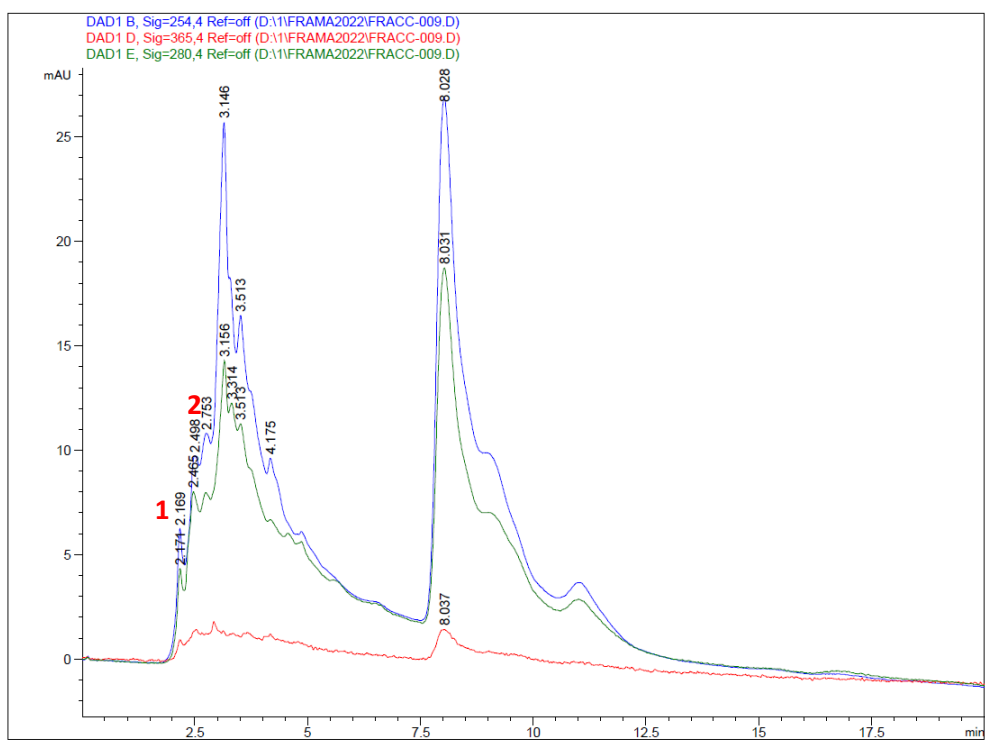

i.- Chromatogram fraction nine (1.- Catechin, 2.- Catechol).

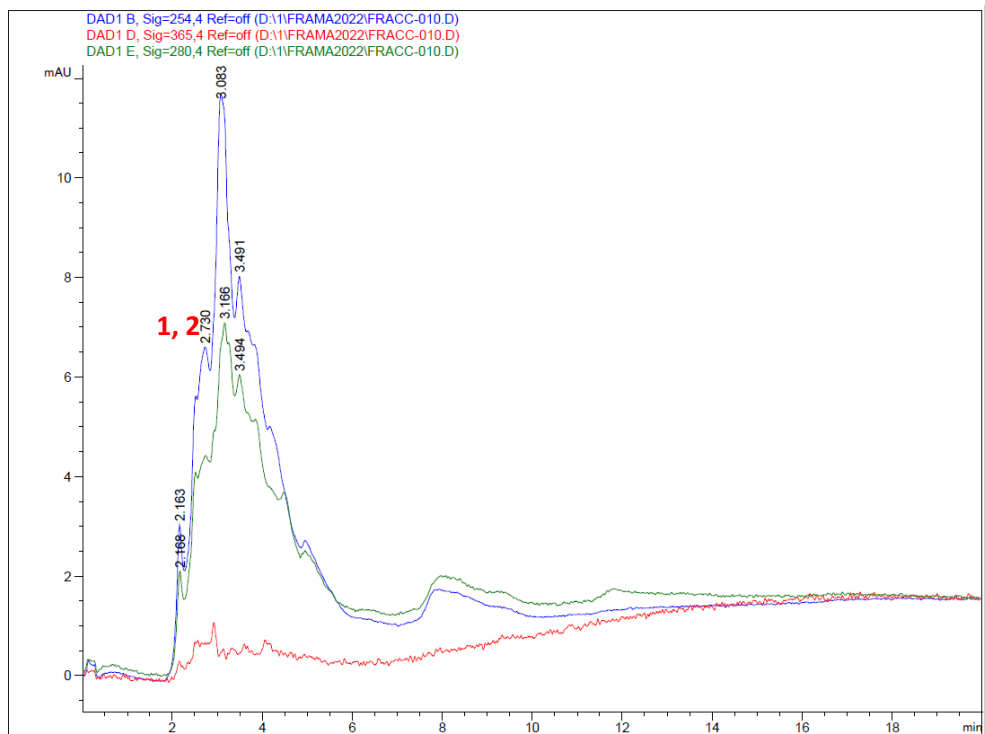

j.- Chromatogram fraction ten (1.- Catechin, 2.- Catechol).

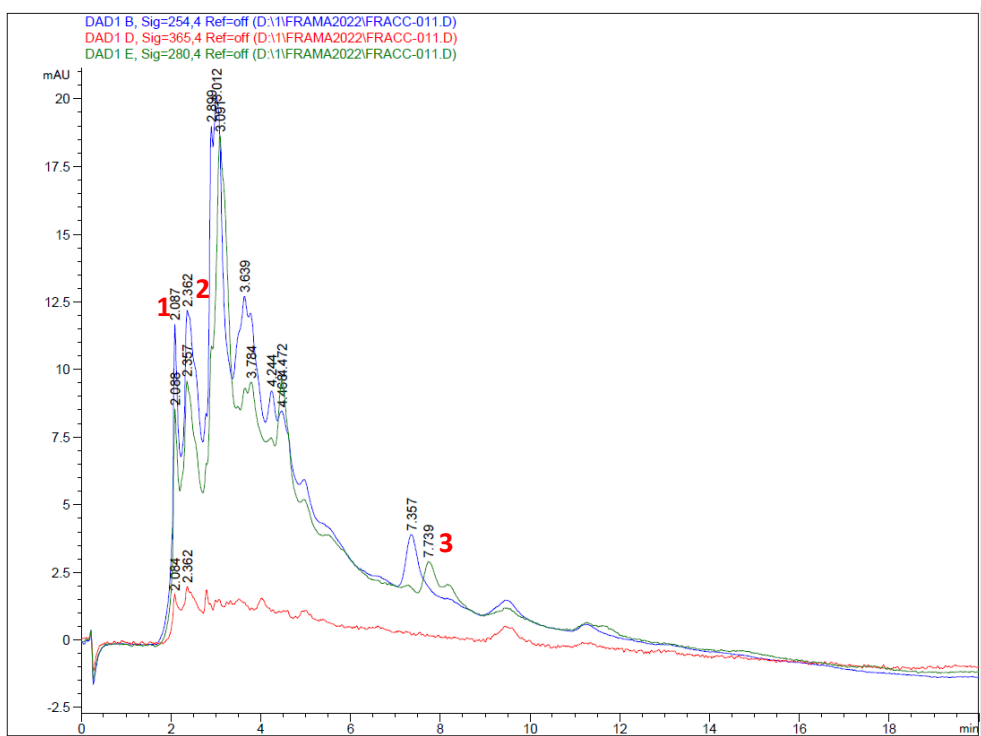

k.- Chromatogram fraction eleven (1.- Catechin, 2.- Catechol, 3.- Naringenin).

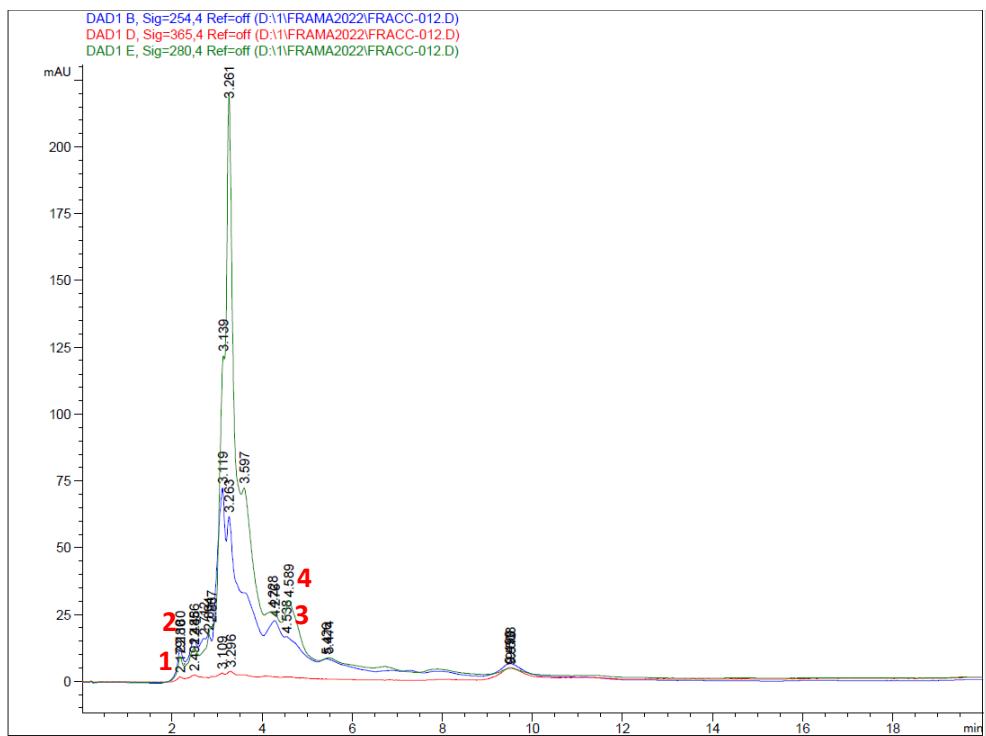

l.- Chromatogram fraction twelve (1.- Catechin, 2.- Catechol, 3.- Naringenin, 4.- Naringin).

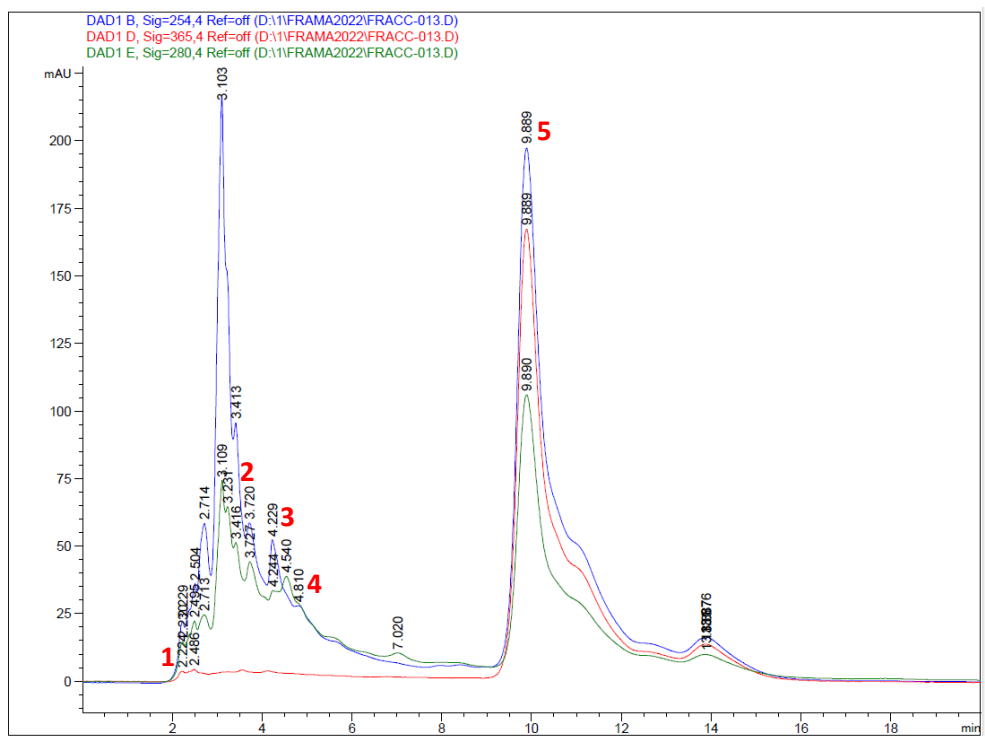

m.- Chromatogram fraction thirteen (1.- Catechin, 2.- Genistein, 3.- Naringin, 4.- Naringenin, 5.- Luteolin).

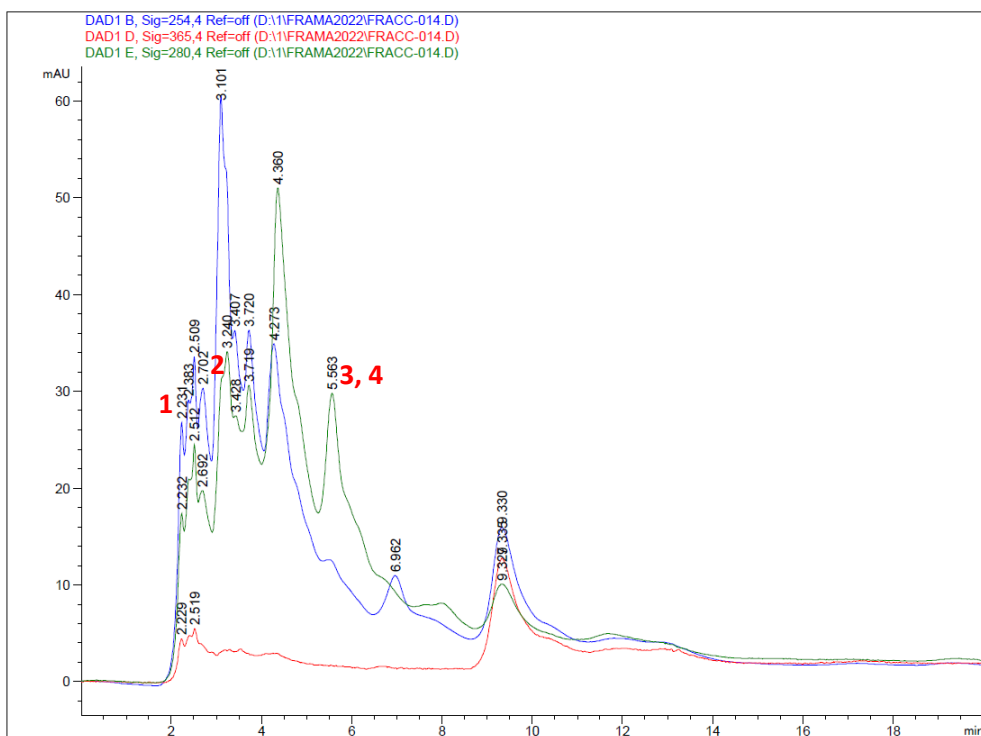

n.- Chromatogram fraction fourteen (1.- Catechin, 2.- Catechol, 3.- Naringin, 4.- Naringenin).

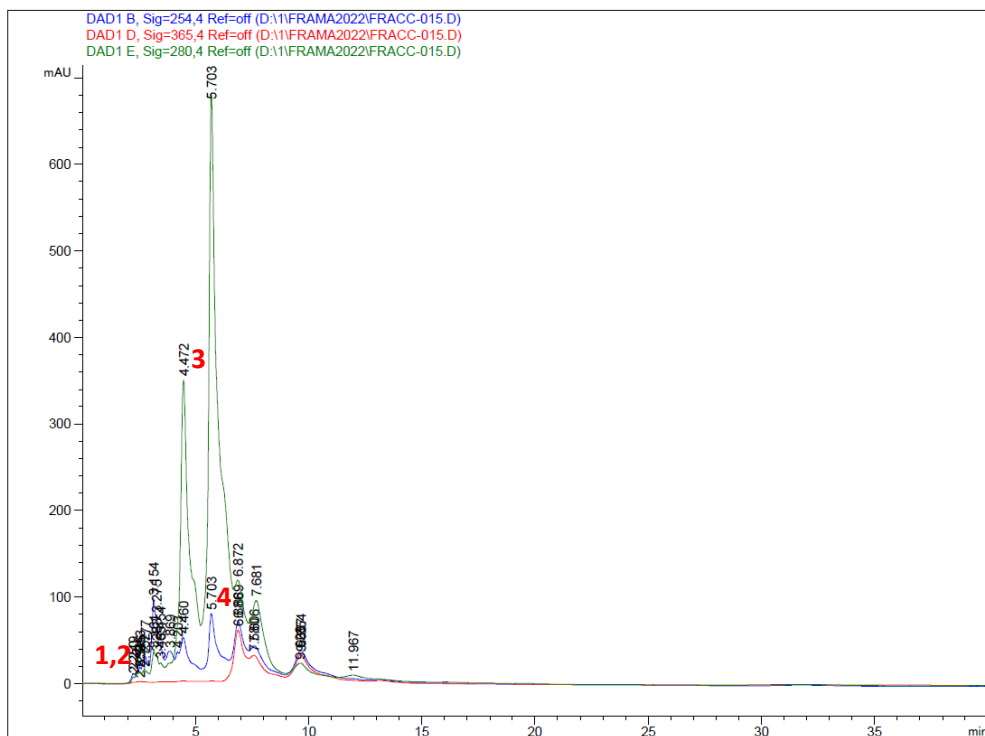

o.- Chromatogram fraction fifteen (1.- Catechin, 2.- Catechol, 3.- Naringin, 4.- Naringenin).

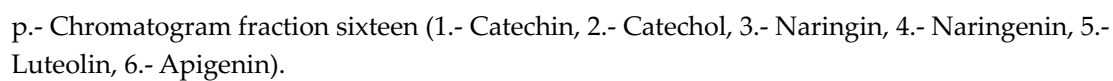

•

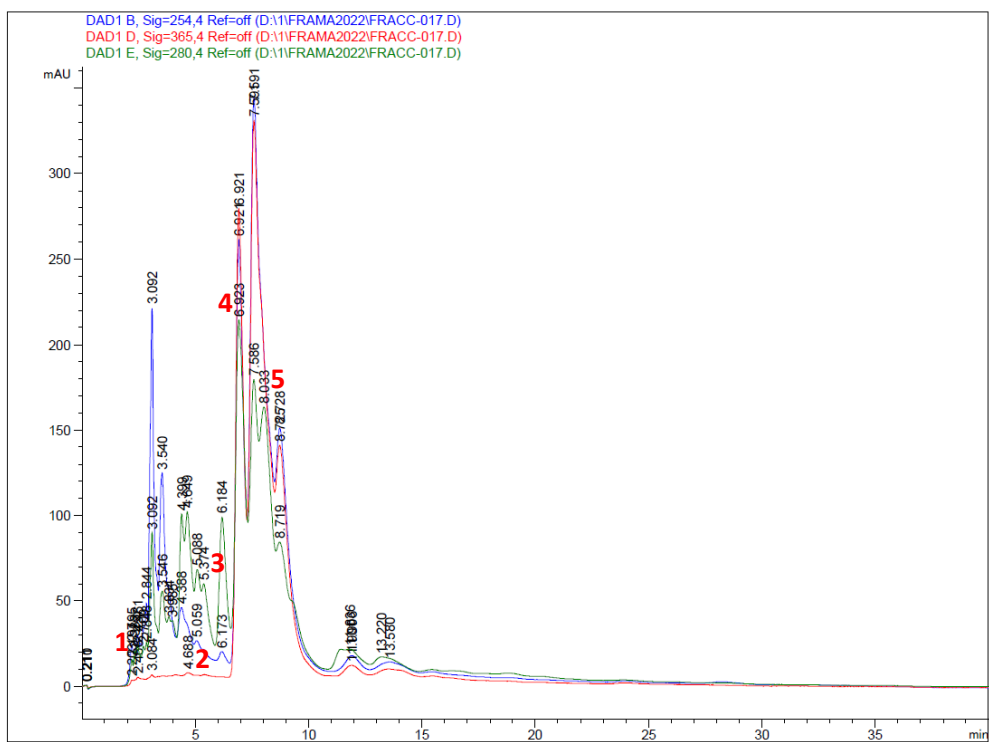

q.- Chromatogram fraction seventeen (1.- Catechin, 2.- Naringin, 3.- Naringenin, 4.- Apigenin, 5.- Luteolin.)

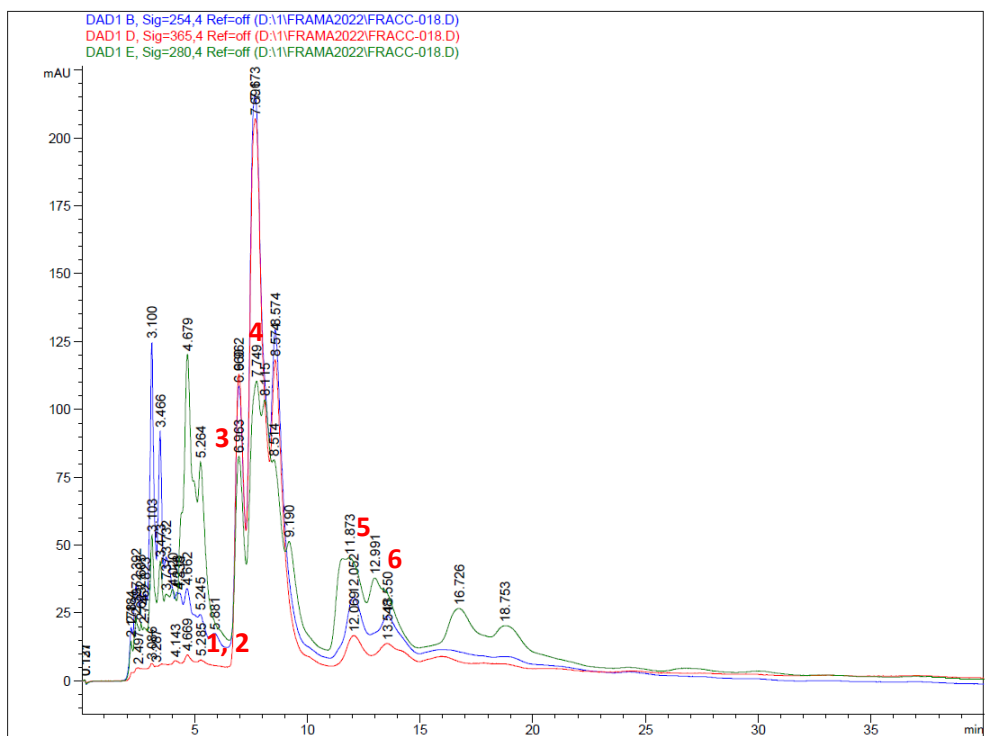

r.- Chromatogram fraction eighteen(1.- Naringin, 2.- Naringenin, 3.- Apigenin, 4.- Luteolin, 5.- Pinocembrin, 6.- Chrysin).

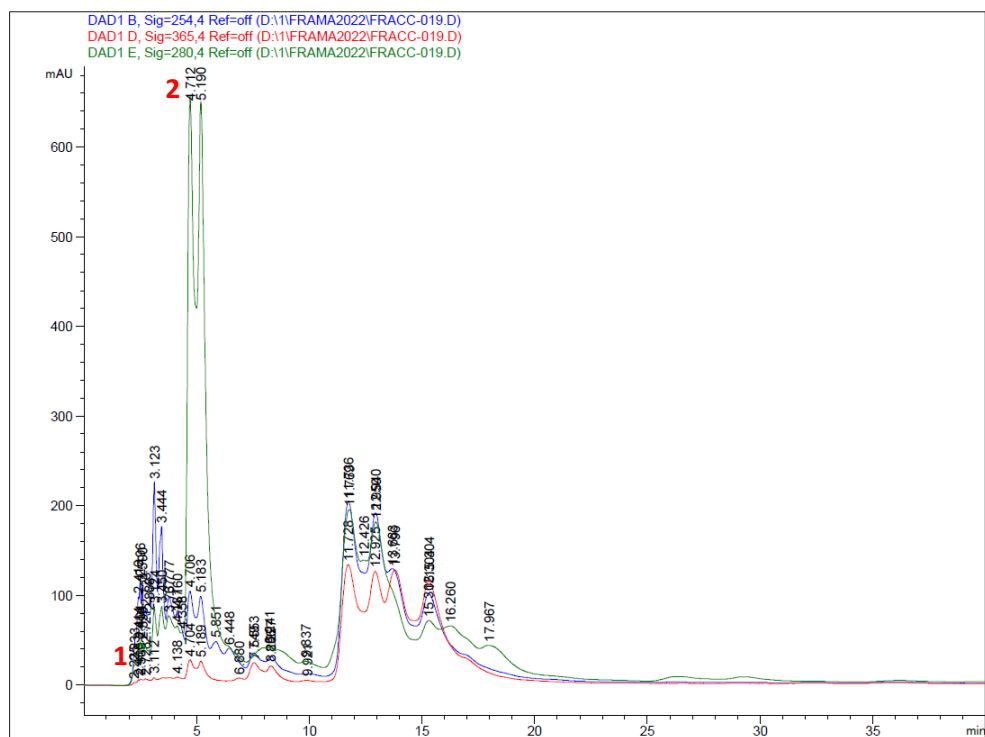

s.- Chromatogram fraction nineteen (1.- Catechin, 2.- Naringenin).

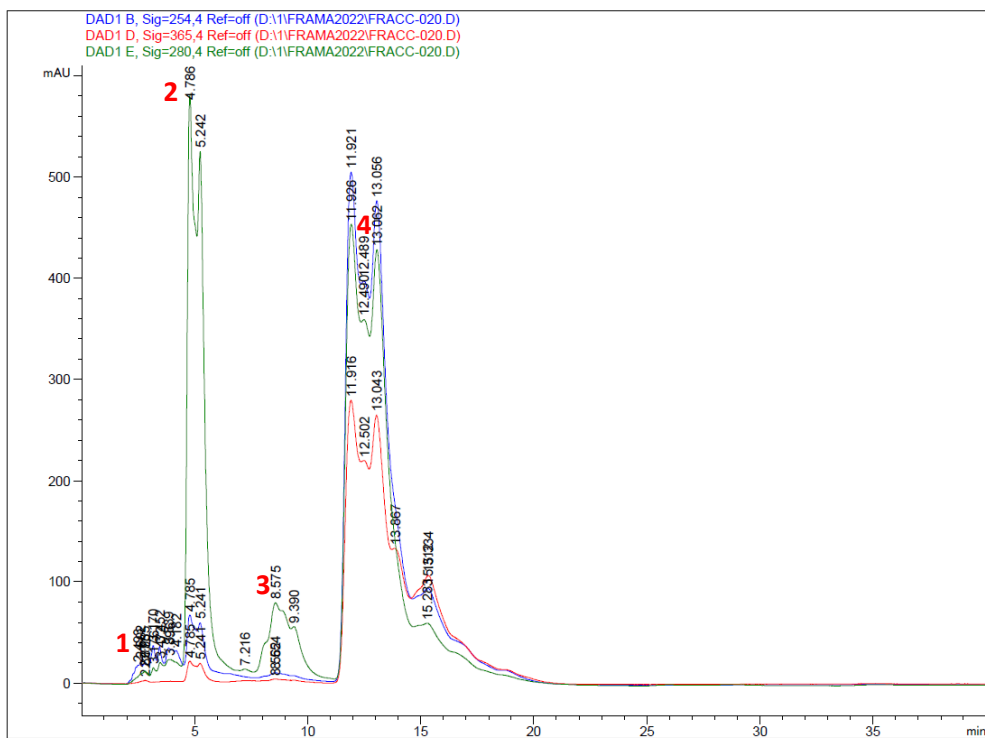



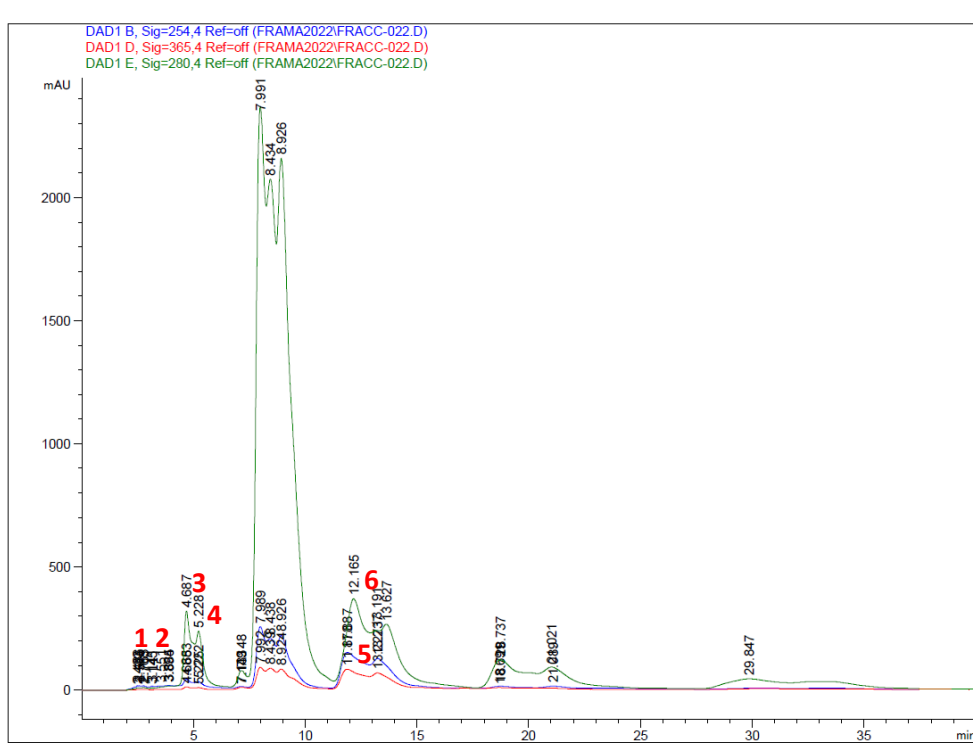

v.- Chromatogram fraction twenty-two (1.- Catechin, 2.- Catechol, 3.-Naringin, 4.- Naringenin, 5.- Baicalein, 6.- Chrysin).

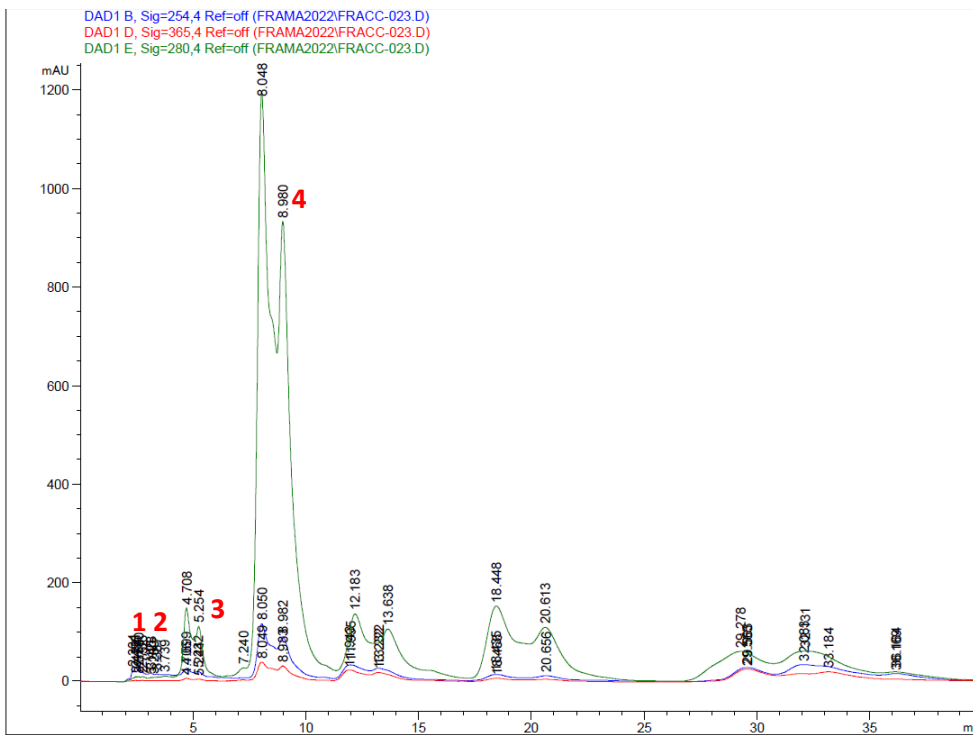

w.- Chromatogram fraction twenty-three (1.- Catechin, 2.- Catechol, 3.- Naringin, 4.- Naringenin).

**Figure S3.** HPLC–MS chromatograms of the fractions obtained from the EA fraction of ChEEP (a-w).

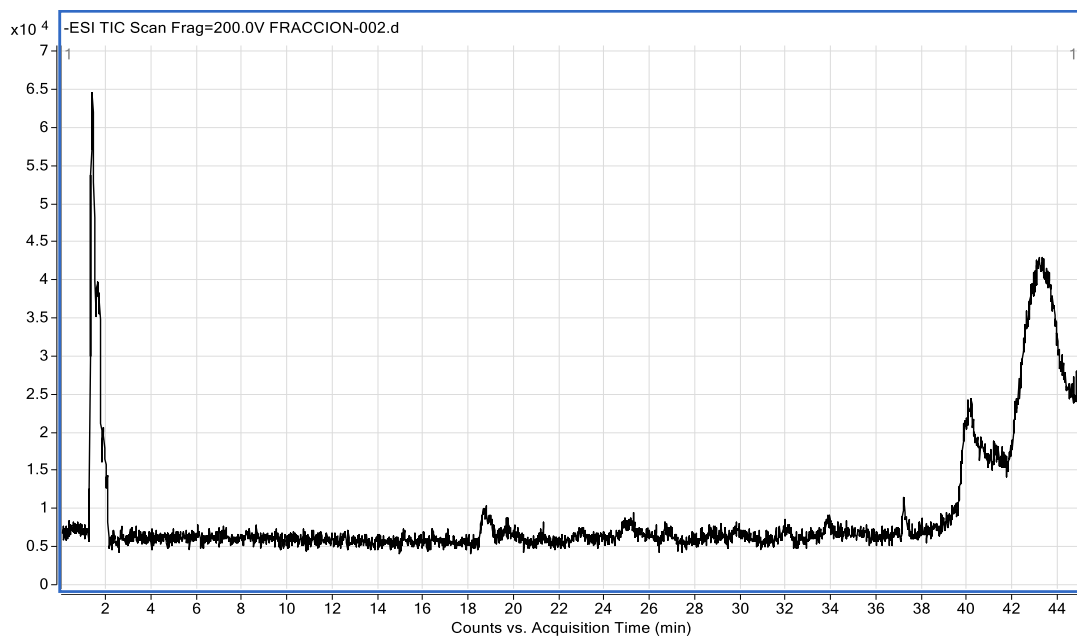

a.- Chromatogram fraction one (Not compounds detected).

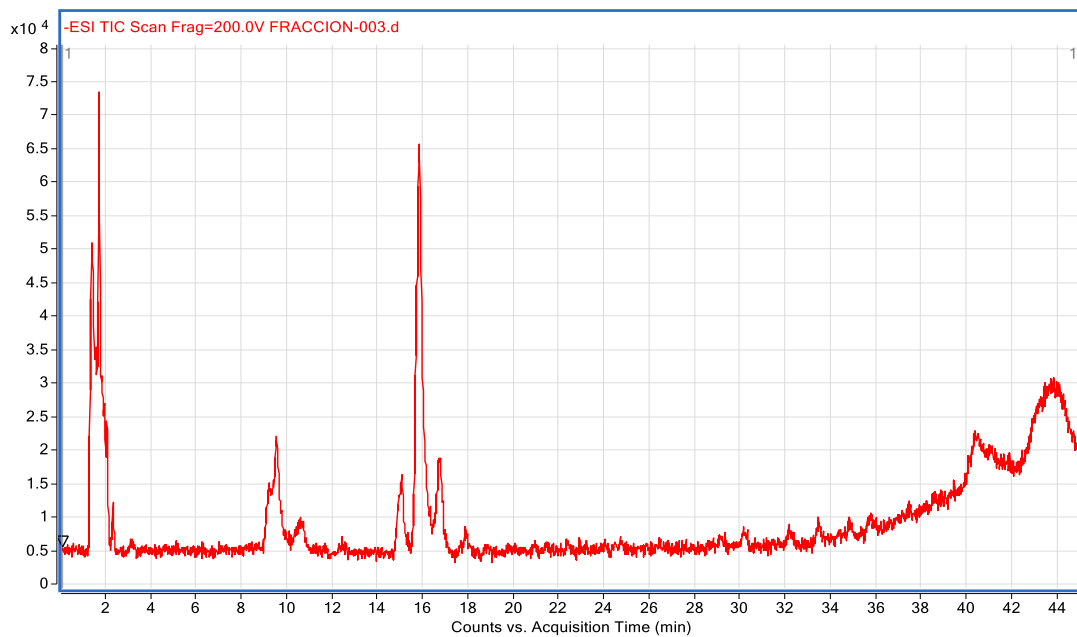

b.- Chromatogram fraction two (Not compounds detected).

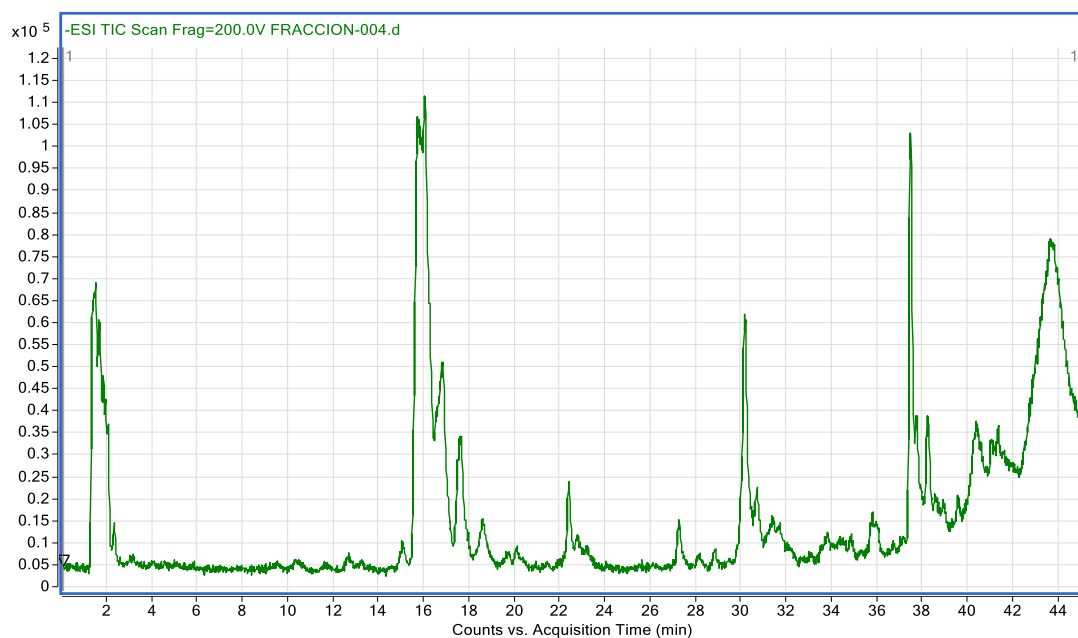

c.- Chromatogram fraction three (Not compounds detected).

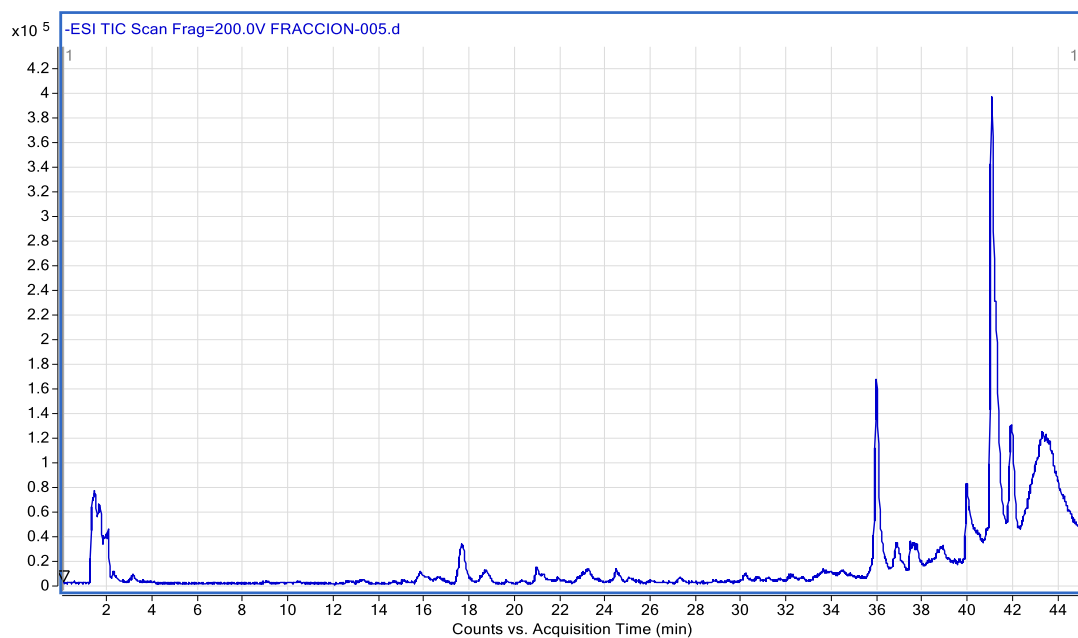

d.- Chromatogram fraction four (Not compounds detected).

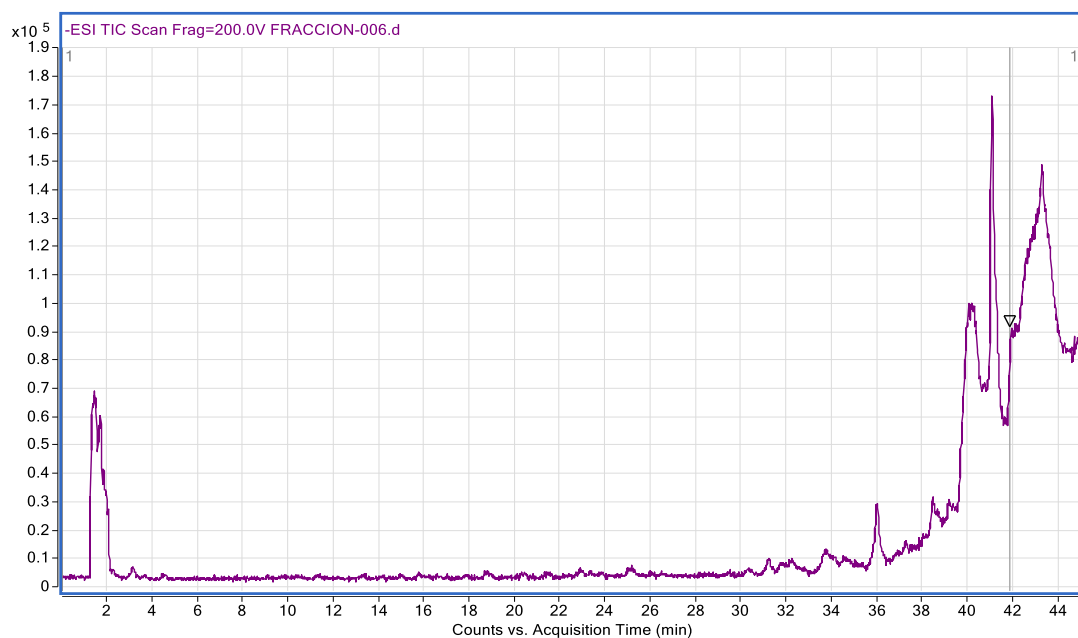

e.- Chromatogram fraction five (Not compounds detected).

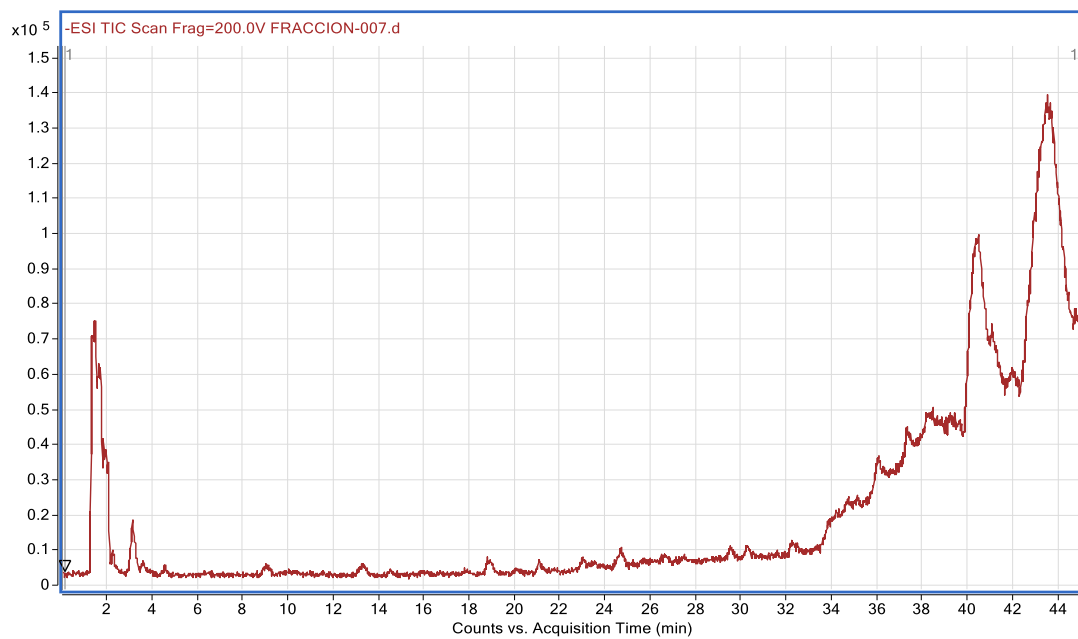

f.- Chromatogram fraction six (Not compounds detected).

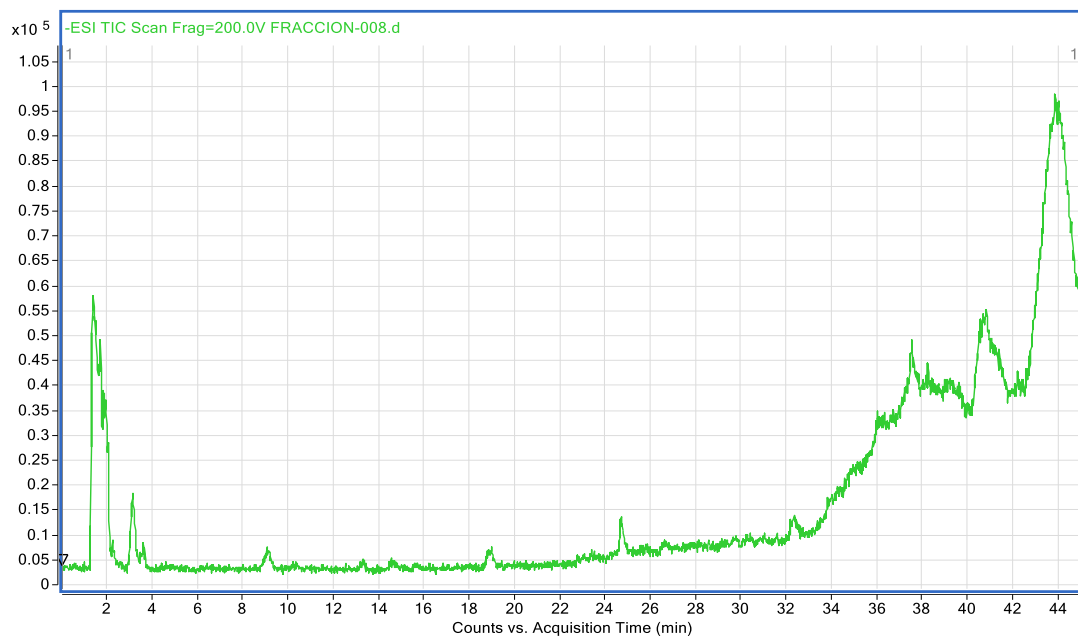

g.- Chromatogram fraction seven (Not compounds detected).

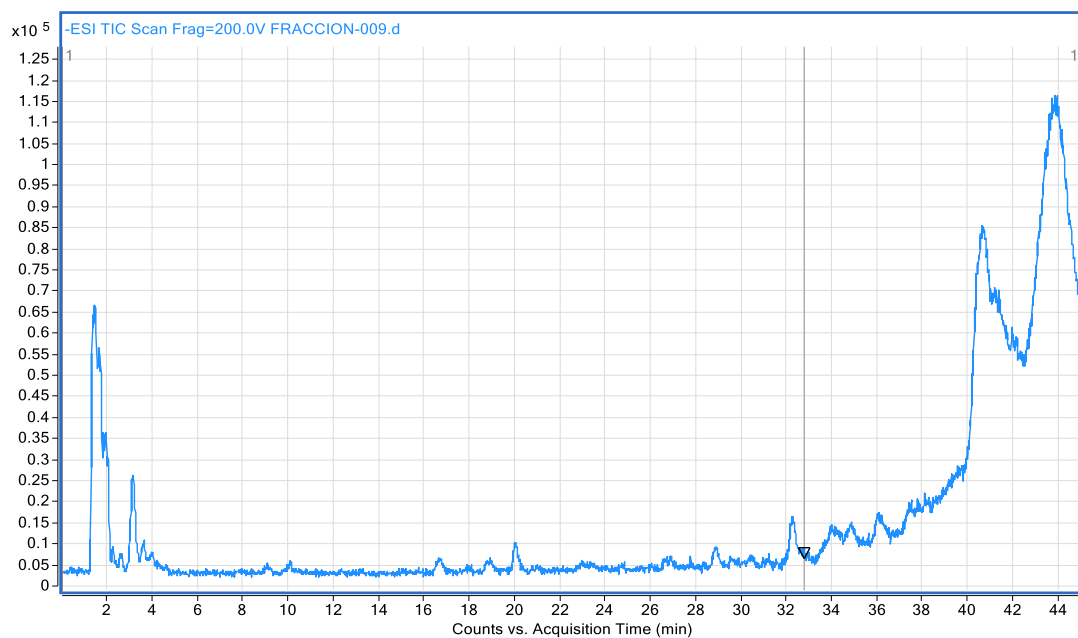

h.- Chromatogram fraction eight (Not compounds detected).

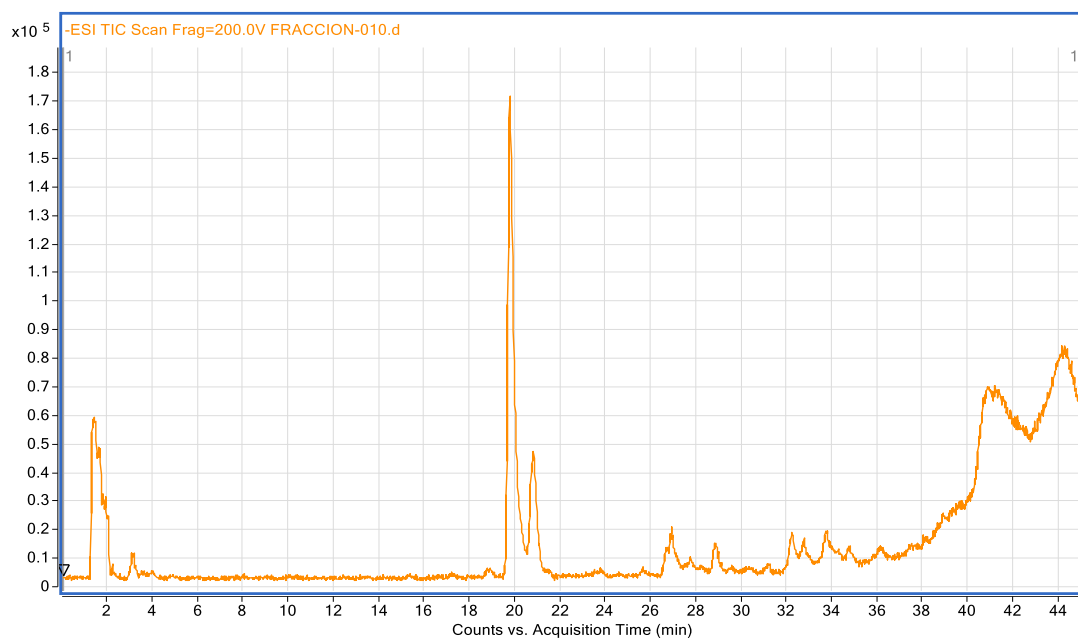

i.- Chromatogram fraction nine (Not compounds detected).

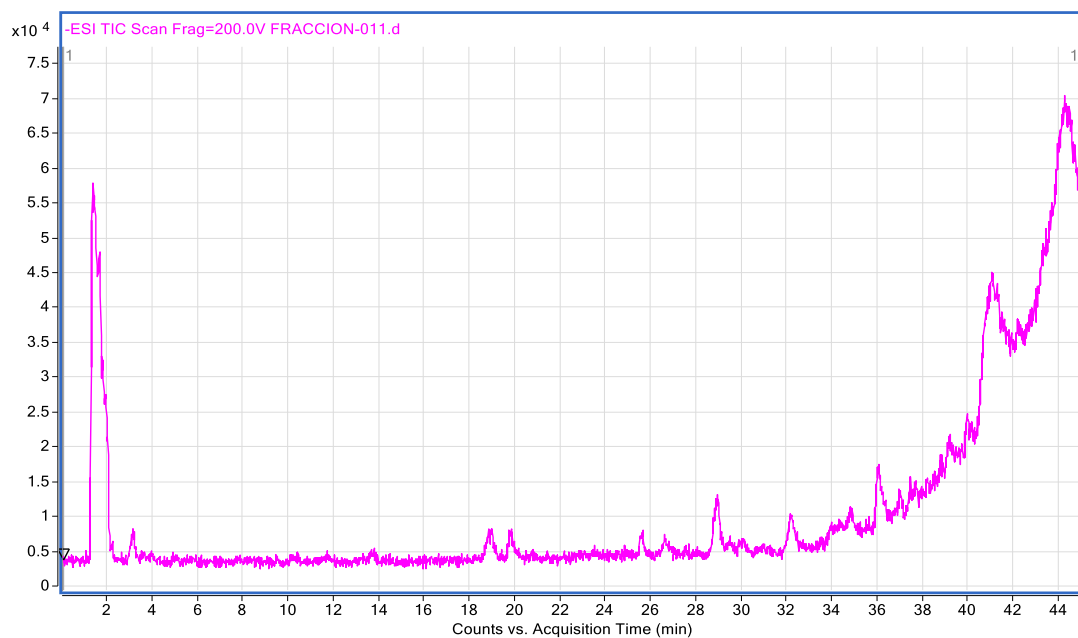

j.- Chromatogram fraction ten (Not compounds detected).

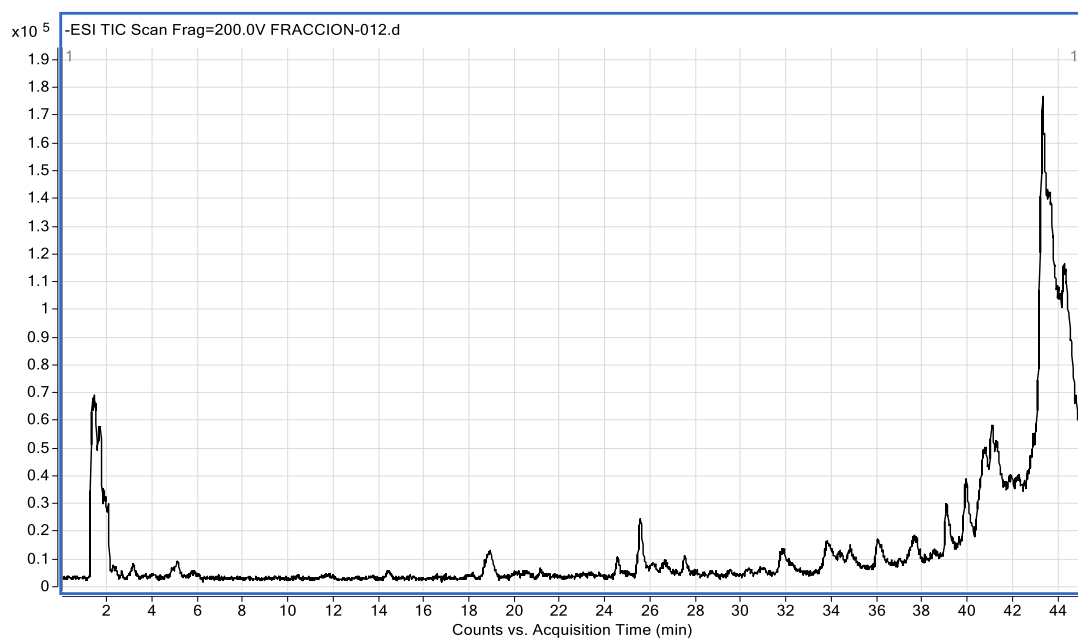

k.- Chromatogram fraction eleven (Not compounds detected).

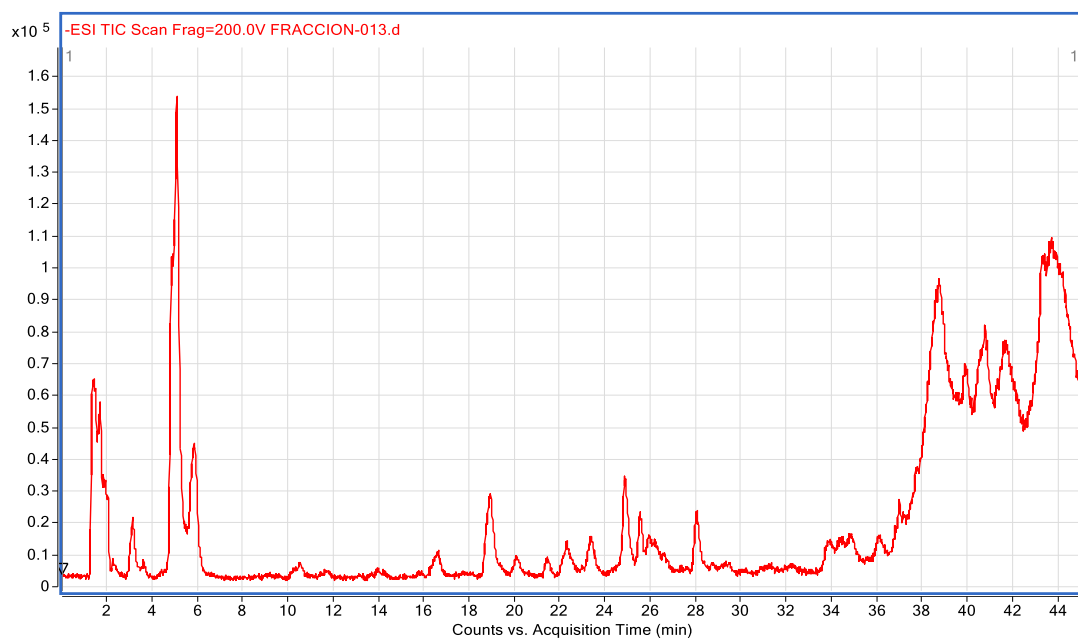

I.- Chromatogram fraction twelve (1. Kaemferol, 2. Pinocembrin, 3. Acacetin).

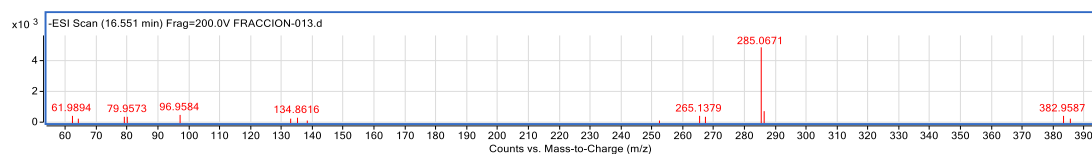

Kaemferol. Error ppm -2.94

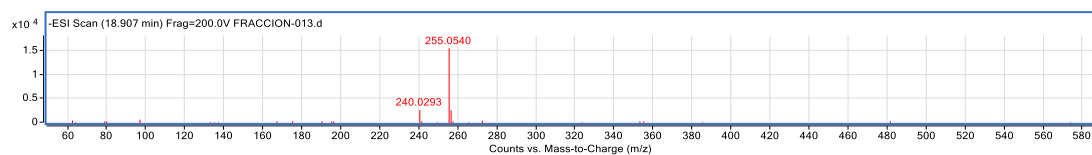

Pinocembrin. Error ppm -11.39

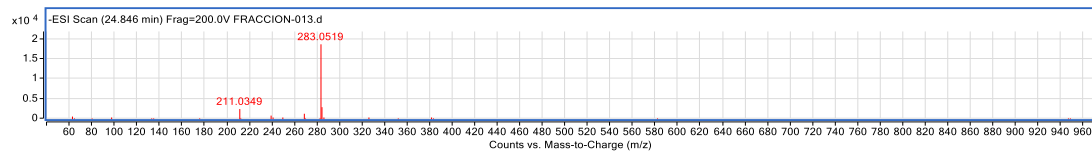

Acacetin. Error ppm -1.79



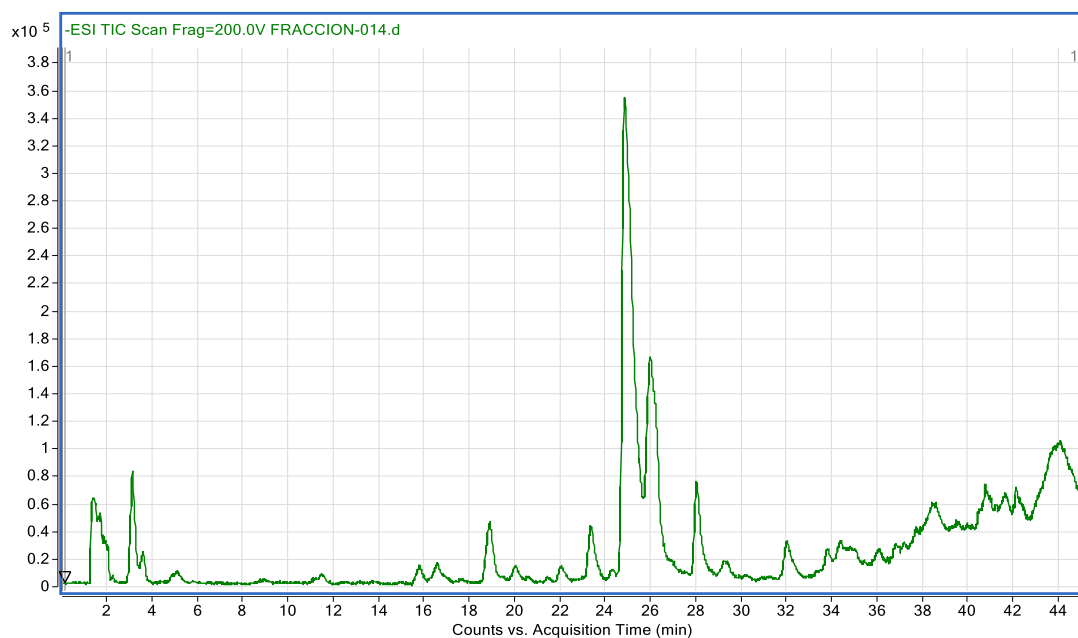

m.- Chromatogram fraction thirteen (1. Kaemferol, 2. Pinocembrin, 3. Acacetin).

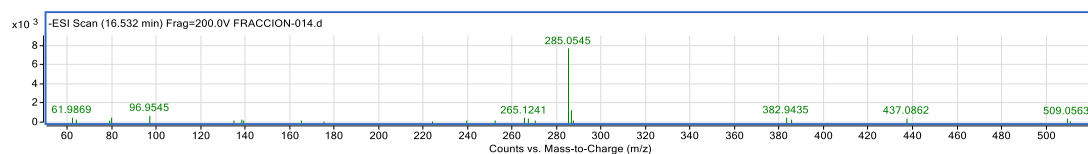

Kaemferol. Error ppm 3.68

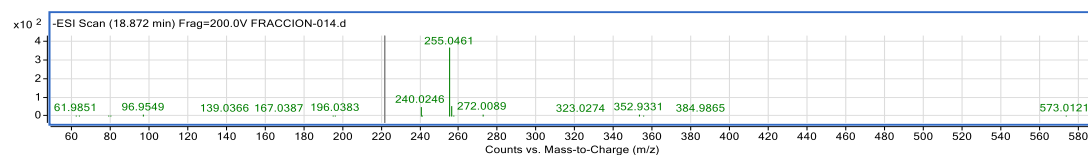

Pinocembrin. Error ppm -2.96

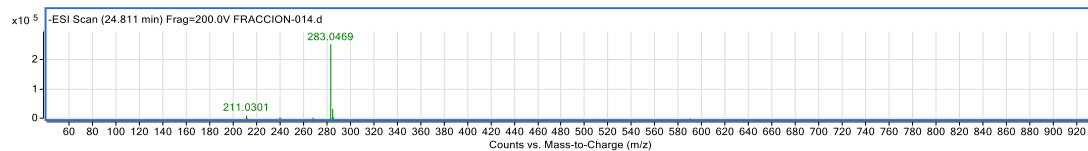

Acacetin. Error ppm -3.26

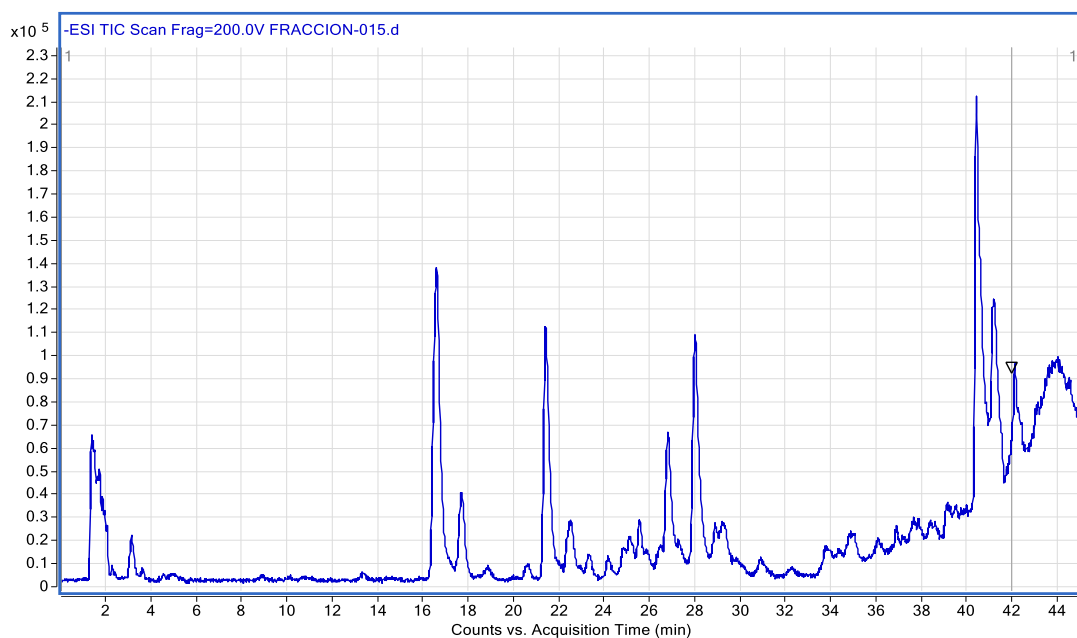

n.- Chromatogram fraction fourteen (1. Kaemferol, 2. Genistein, 3. Apigenin, 4. Baicalein).

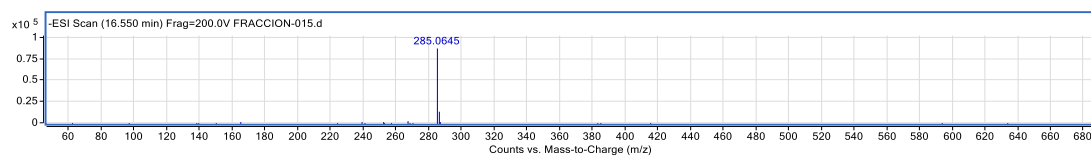

Kaemferol. Error ppm -9.81

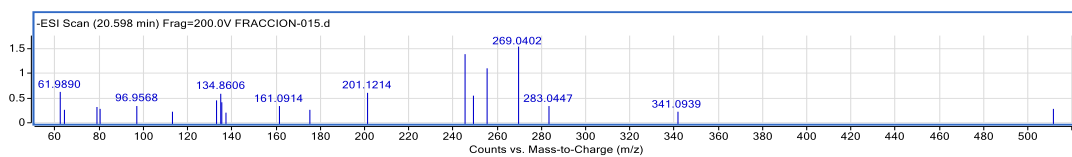

Genistein. Error ppm 4.98

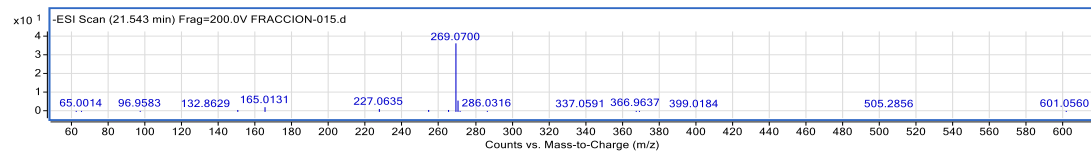

Apigenin. Error ppm -11.81

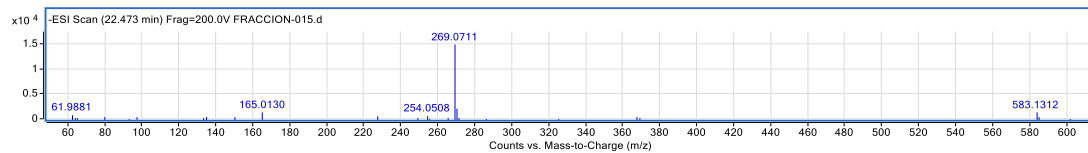

Baicalein. Error ppm 2.94

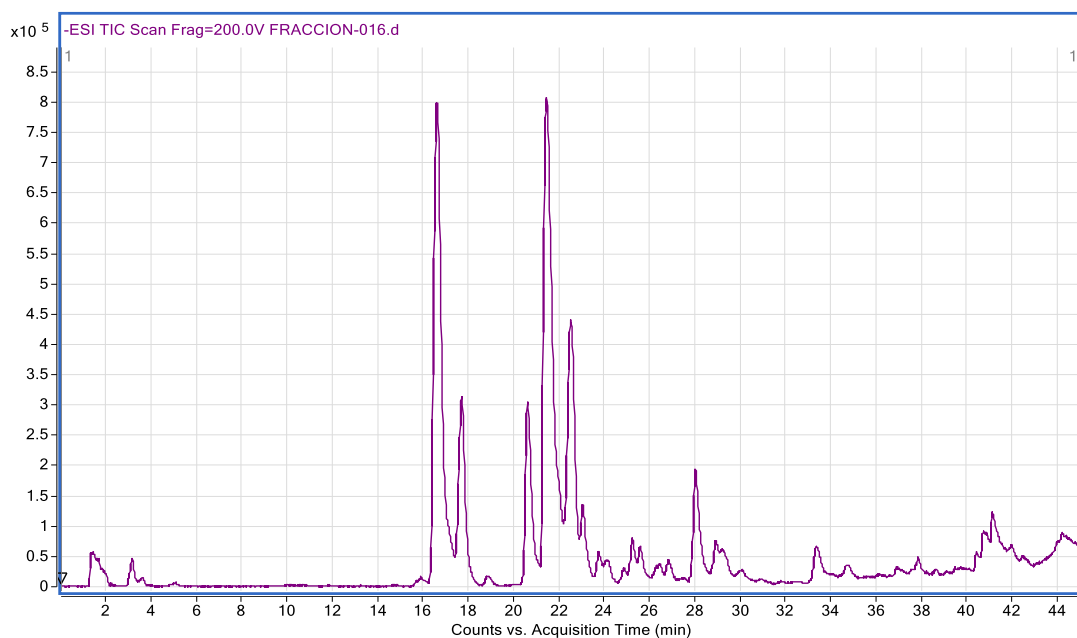

o.- Chromatogram fraction fifteen (1. Kaemferol, 2. Genistein, 3. Apigenin, 4. Baicalein).

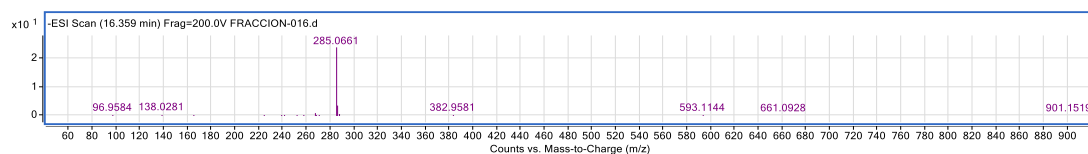

Kaemferol. Error ppm 3.38

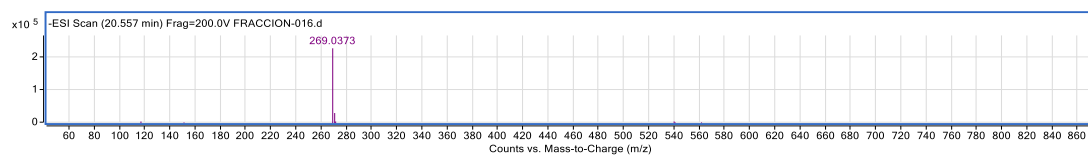

Genistein. Error ppm -6

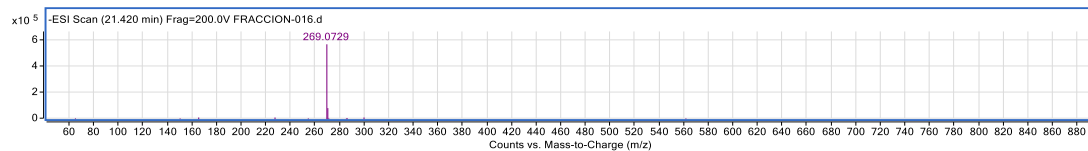

Apigenin. Error ppm -3.05

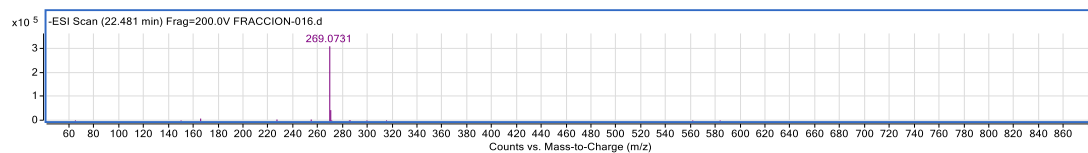

Baicalein. Error ppm -1.57

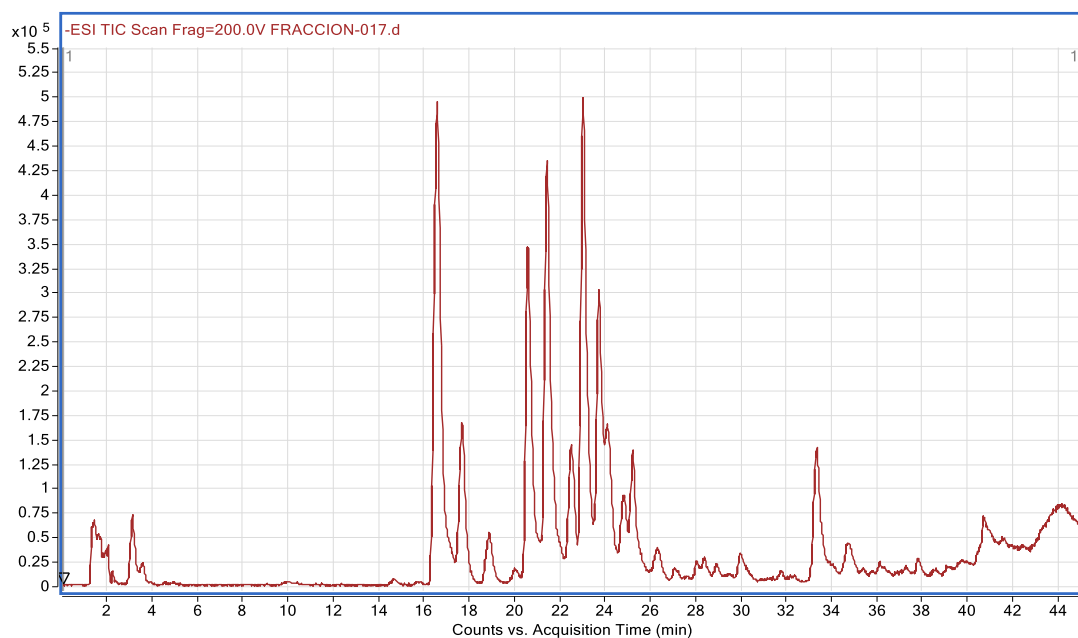

p.- Chromatogram fraction sixteen (1. Kaemferol, 2. Pinocembrin, 3. Genistein, 4. Apigenin, 5. Baicalein).

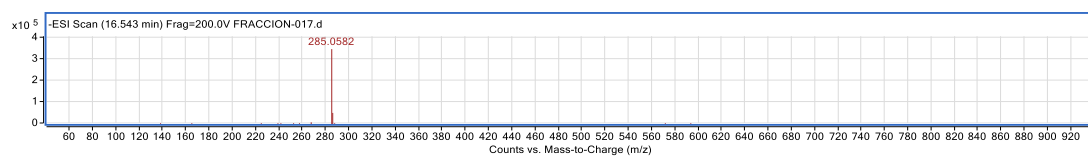

Kaemferol. Error ppm -8.16

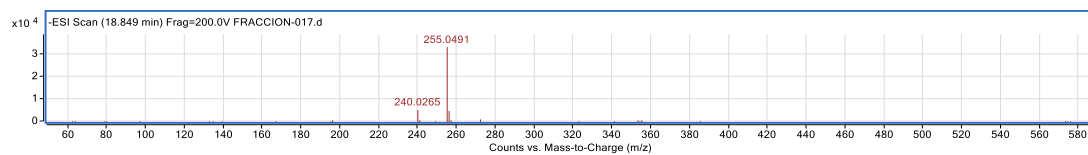

Pinocembrin. Error ppm 7.68

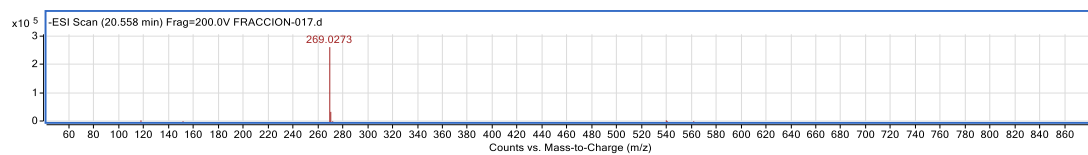

Genistein. Error ppm 11.39

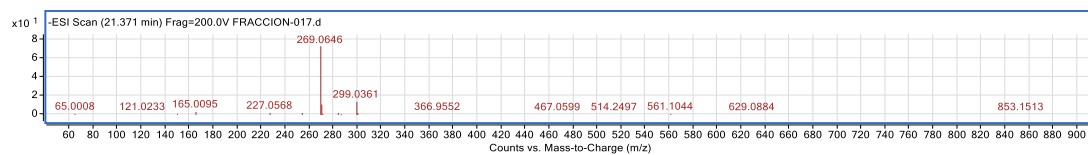

Apigenin Error ppm 12.67

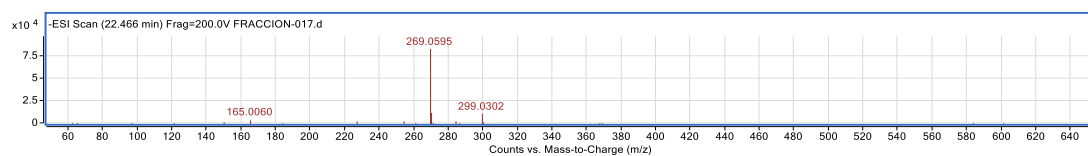

Baicalein. Error ppm -9.98

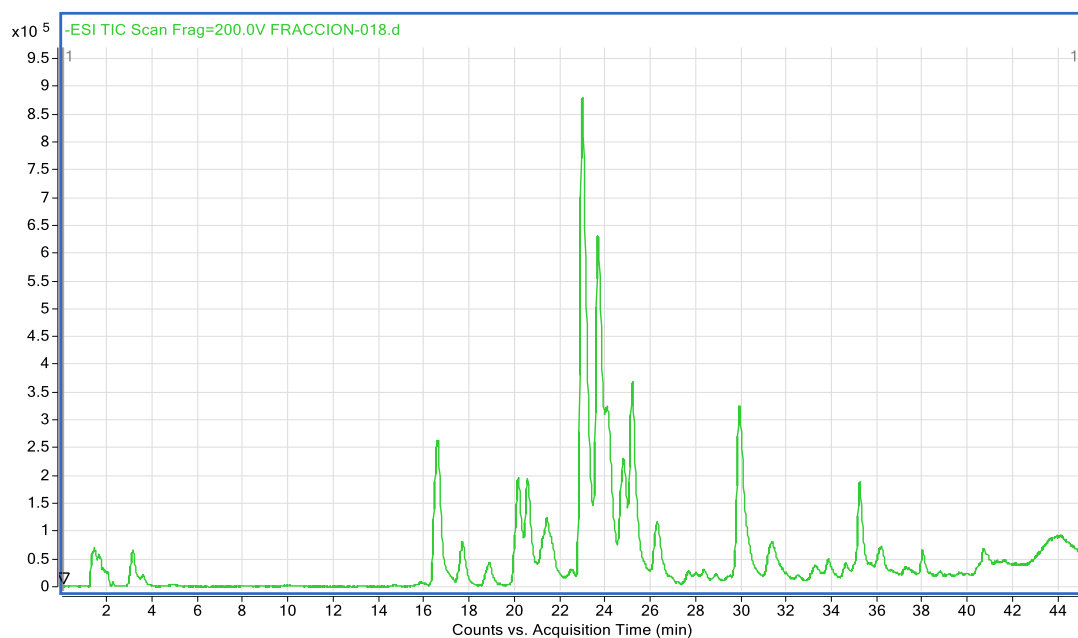

q.- Chromatogram fraction seventeen (1. Kaemferol, 2. Pinocembrin, 3. Naringenin).

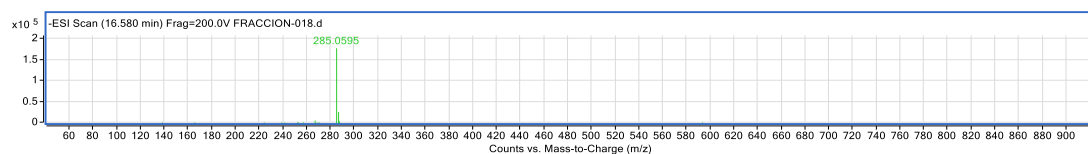

Kaemferol. Error ppm -6.41

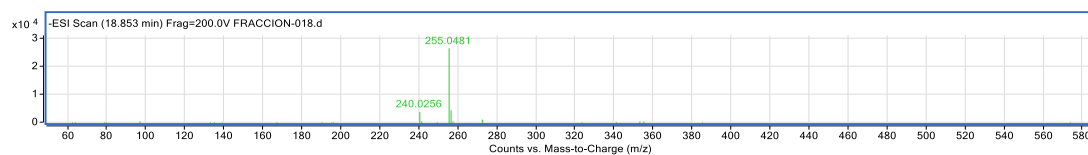

Pinocembrin. Error ppm 9.37

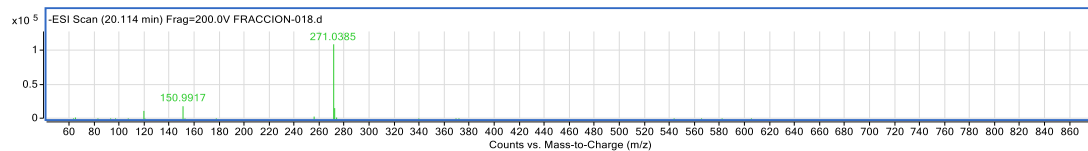

Naringenin. Error ppm 6.34

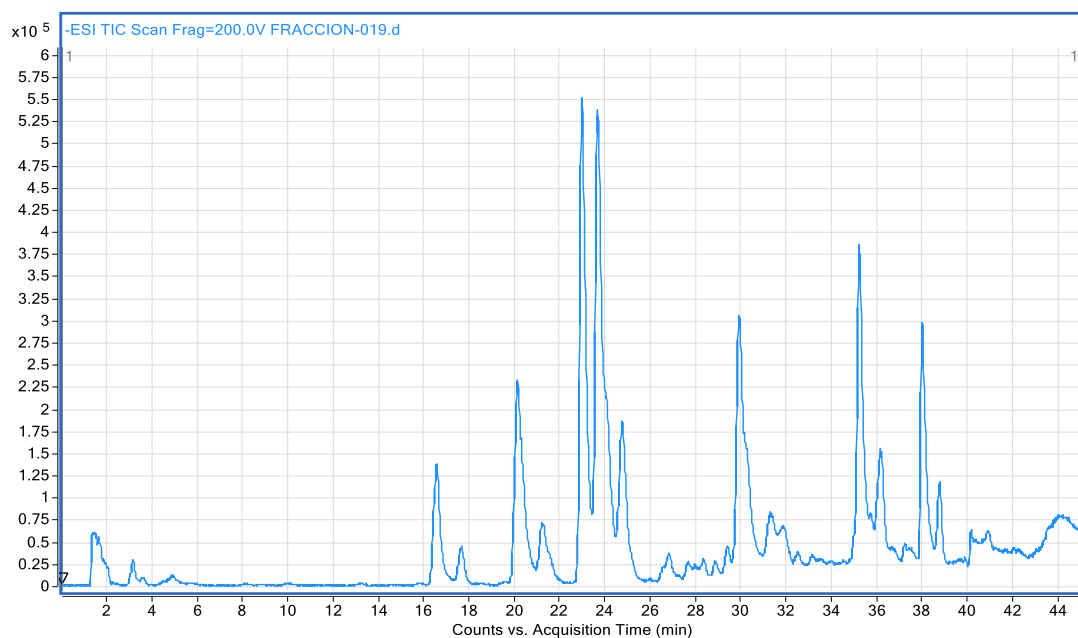

r.- Chromatogram fraction eighteen (1. Kaemferol, 2. Naringenin).

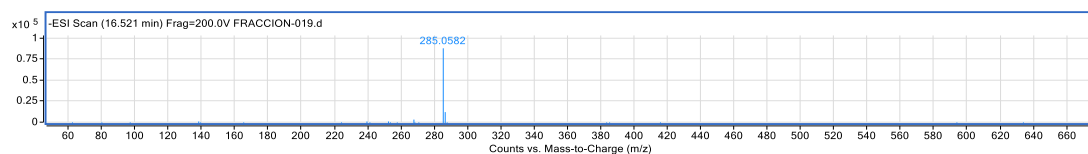

Kaemferol. Error ppm -8.04

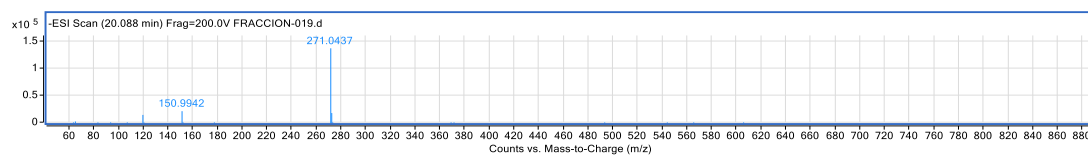

Naringenin. Error ppm 8.55

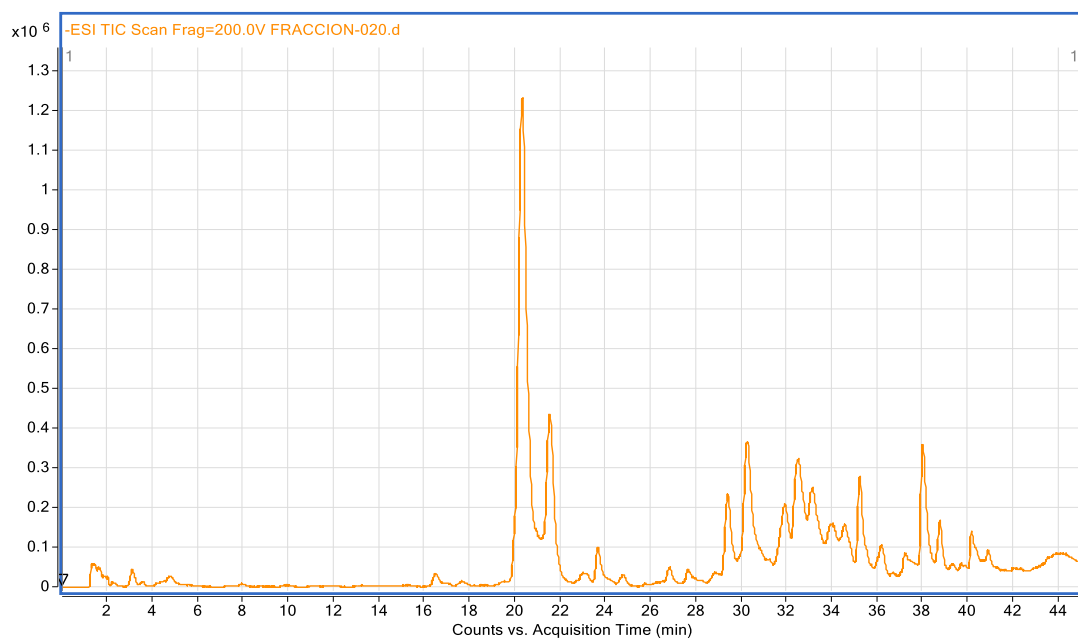

s.- Chromatogram fraction nineteen (1. Naringenin).

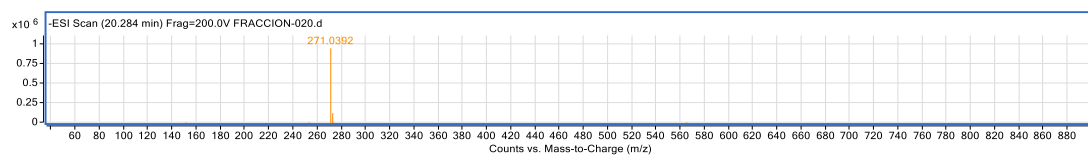

Naringenin. Error ppm 3.38



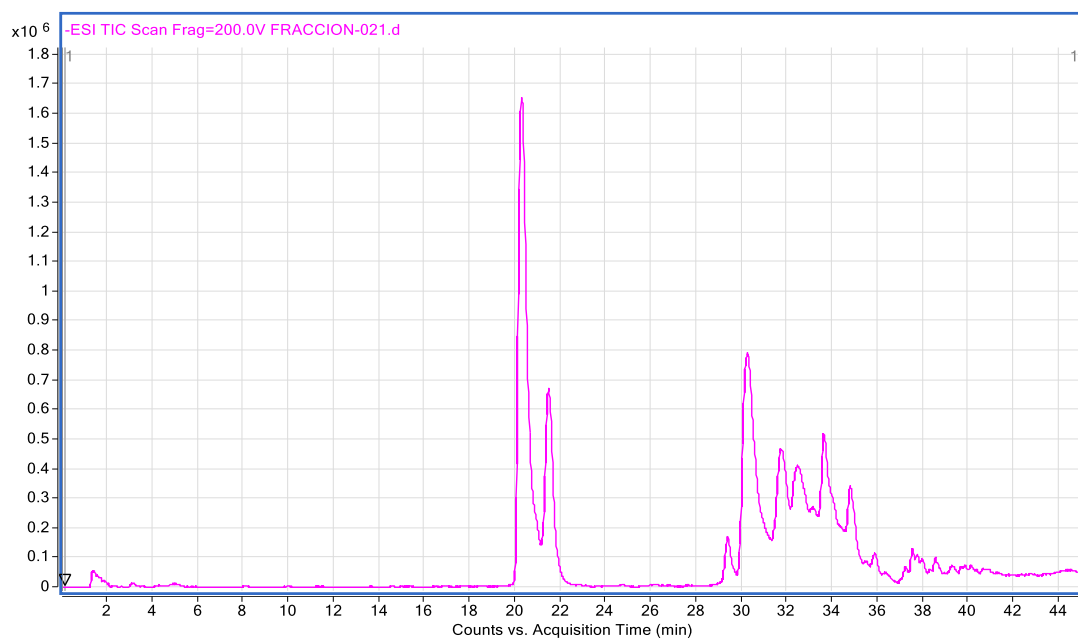

t.- Chromatogram fraction twenty (1. Naringenin).

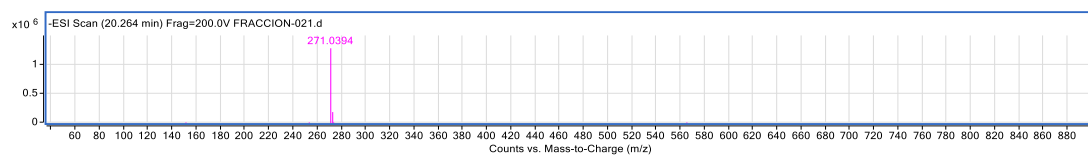

Naringenin. Error ppm 2.59

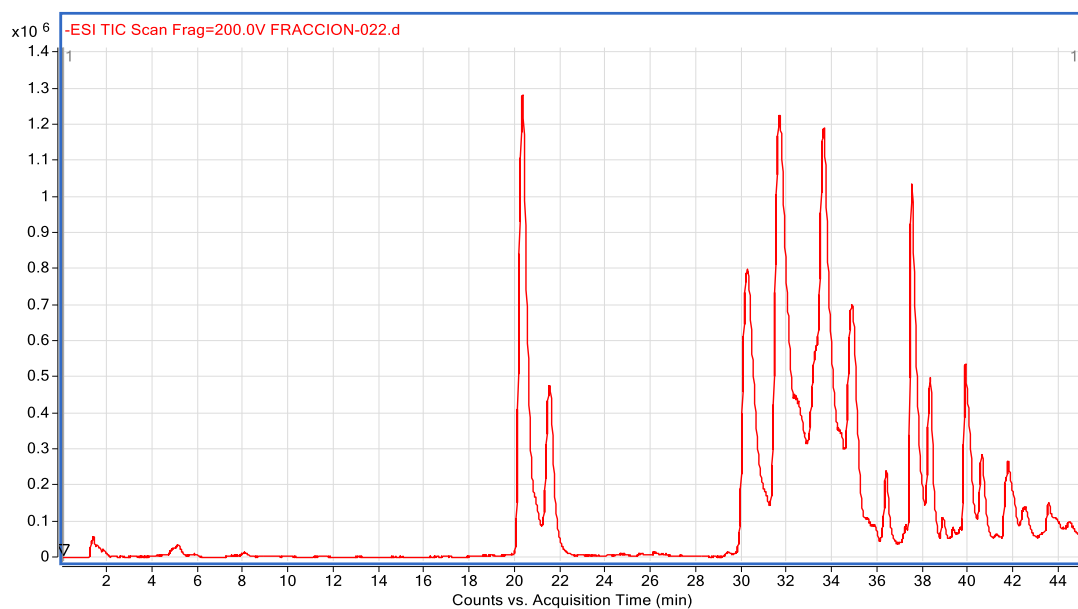

u.- Chromatogram fraction twenty-one (1. Naringenin).

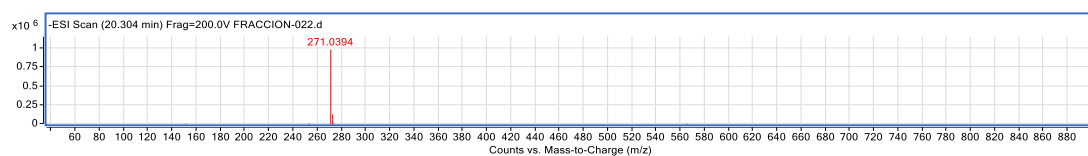

Naringenin. Error ppm 2.92

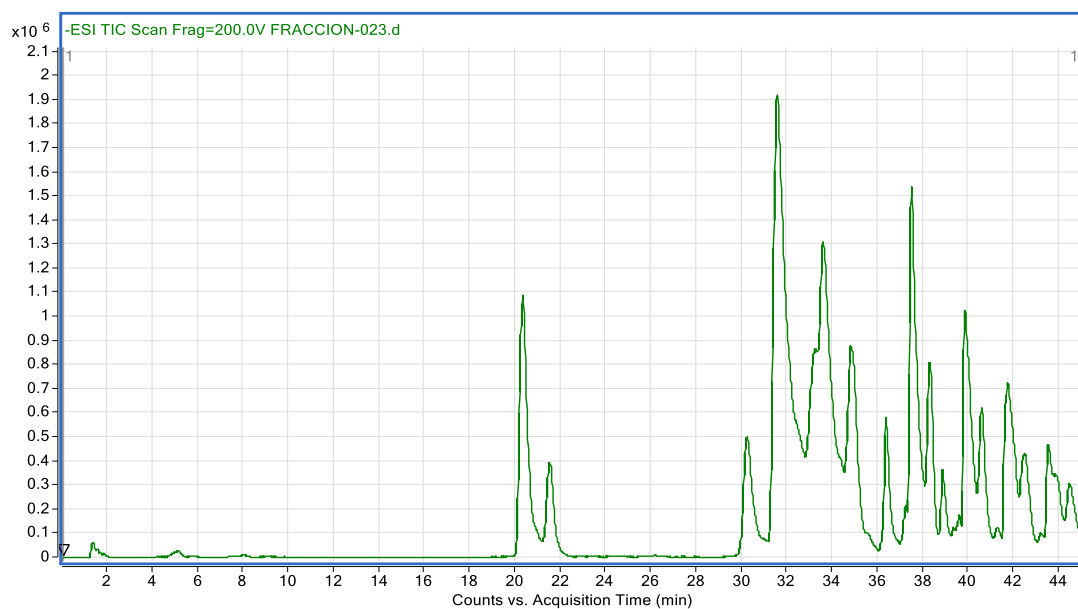

v.- Chromatogram fraction twenty-two (1. Naringenin).

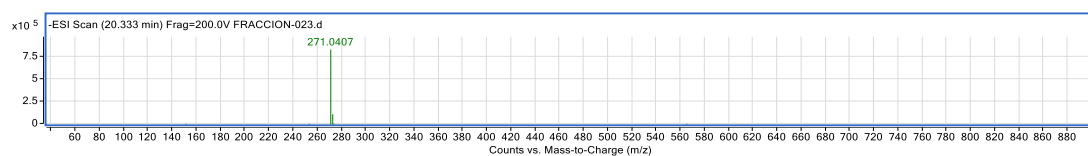

Naringenin. Error ppm -1.81

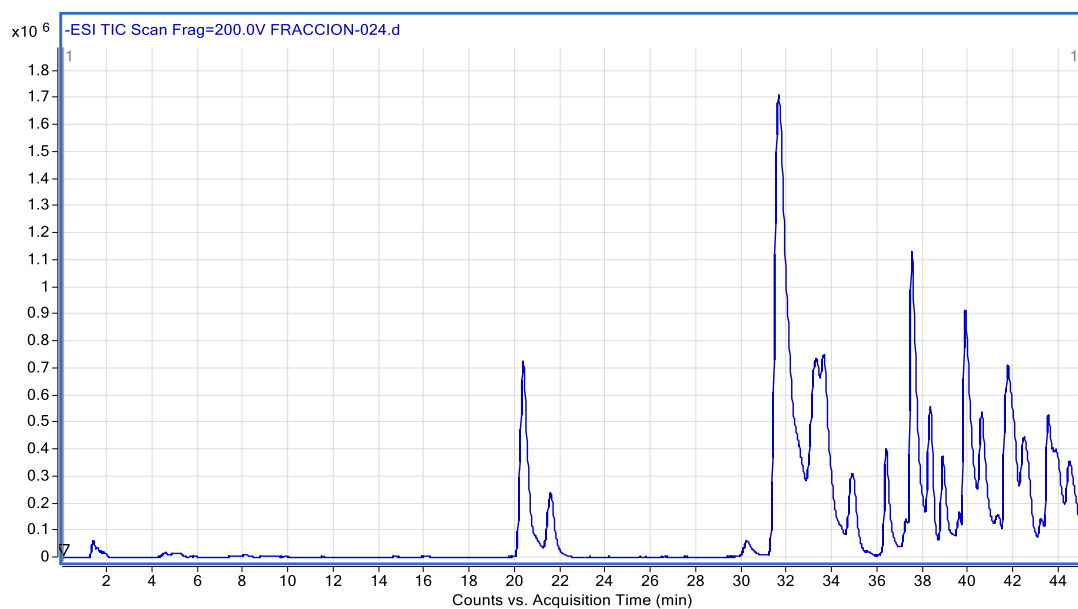

w.- Chromatogram fraction twenty-three (1. Naringenin).

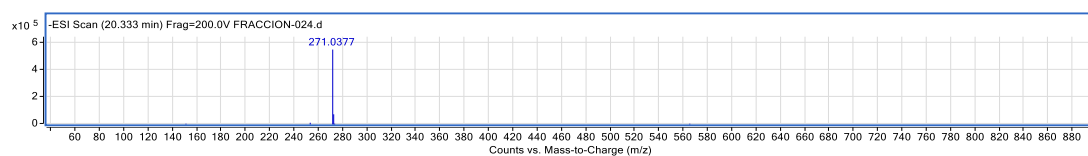

Naringenin. Error ppm 9.06
